# Supplementary material for: RNA-Seq and genetic diversity analysis of faba bean (Vicia faba L.) varieties in China
Source: PeerJ. 2023 Jan 10;11:e14259. doi: 10.7717/peerj.14259 (PMC9838209; doi:10.7717/peerj.14259)
Supplement: Supplemental Information 2 — The sequencing depth was 32 and the sample number was 3 [file peerj-11-14259-s002.xls]

## Sheet: result
power=c(0.8, 0.9)， numbers for samples=?
> rnapower(32, cv=0.37,cv2=0.35, effect=c(1.5, 2), alpha=.05,power=c(.8, .9))
	0.8	0.9
1.5	15.3682	20.5736
2	5.25869	7.0399
> rnapower(32, cv=0.35,cv2=0.43, effect=c(1.5, 2), alpha=.05,power=c(.8, .9))
	0.8	0.9
1.5	17.6598	23.6414
2	6.04284	8.08965
n=3，power=?
> rnapower(32, cv=0.37,cv2=0.35, effect=c(1.5, 2), alpha=.05,n=3)
1.5	2
0.2351	0.562017
> rnapower(32, cv=0.35,cv2=0.43, effect=c(1.5, 2),alpha = .05,n=3)
1.5	2
0.210336	0.505594
