# Supplementary material for: RNA-Seq and genetic diversity analysis of faba bean (Vicia faba L.) varieties in China
Source: PeerJ. 2023 Jan 10;11:e14259. doi: 10.7717/peerj.14259 (PMC9838209; doi:10.7717/peerj.14259)
Supplement: Supplemental Information 5 — 5200 SSR markers. SSR motif and repeats were analyzed with Microsatellite identification tool and the primers were designed using Primer 3.0. [file peerj-11-14259-s005.xls]

## Sheet: Sheet1
Unigene_ID	SSR	FORWARD PRIMER1 (5'-3')	Tm	REVERSE PRIMER1 (5'-3')	Tm
TRINITY_DN10012_c0_g1_i1_gene=TRINITY_DN10012_c0_g1_len=328	(CCA)5	CTGTCCCTGGTAAAACGCAT	59.993	TTGTGGAAGTTGACGTTGTTG	59.643
TRINITY_DN10160_c0_g2_i1_gene=TRINITY_DN10160_c0_g2_len=647	(T)11	AGCGGATCCATTGTTTATGC	59.929	AAGCGAATCAACCAGAATGG	60.074
TRINITY_DN10216_c0_g1_i1_gene=TRINITY_DN10216_c0_g1_len=374	(A)10	GACTGGATGAAGAATTAAACACATAAA	58.996	CGGCCCTGATTATACTCCAA	59.916
TRINITY_DN10297_c0_g1_i1_gene=TRINITY_DN10297_c0_g1_len=305	(GAA)5	TGGTGGAGTGAAGAAGGAGAG	59.435	GAGTTGTGACATGAAAATCACG	58.132
TRINITY_DN10415_c0_g1_i1_gene=TRINITY_DN10415_c0_g1_len=500	(TGA)8	GGAGAAAGCAATTCAGCGAC	59.962	CTGTTTTGGCCCTTCTTCAA	60.22
TRINITY_DN10416_c0_g1_i1_gene=TRINITY_DN10416_c0_g1_len=530	(ATTA)5	CGATTTAATTGACGCGTGTG	60.133	CCAACCCAAATCAAACAACC	60.066
TRINITY_DN10542_c0_g1_i1_gene=TRINITY_DN10542_c0_g1_len=234	(A)10	GGCCCAATAATAAAAATATTAGTCCA	59.788	AGCCTTCCCTCTTCCAAAAA	60.18
TRINITY_DN10574_c1_g1_i1_gene=TRINITY_DN10574_c1_g1_len=274	(T)10	CAGGCTTGGAAATGCAATCT	60.214	GTTGGAATGGCAACGTCTCT	60.119
TRINITY_DN10598_c0_g2_i1_gene=TRINITY_DN10598_c0_g2_len=932	(TCT)7	CCTTCTTGTTCTTCATCGCC	59.813	ATGTCCTCCACTTCGGACAG	60.112
TRINITY_DN10712_c0_g1_i1_gene=TRINITY_DN10712_c0_g1_len=289	(A)10	ACCACAATCACAACGTGCTC	59.603	TGAAGGGGTGTGTGTGATTC	59.367
TRINITY_DN10721_c0_g1_i1_gene=TRINITY_DN10721_c0_g1_len=296	(A)11	AAAAACCTCCCCCAACACAT	60.455	TGTGGGTGTCTCACGTTGAT	60.005
TRINITY_DN10731_c0_g1_i1_gene=TRINITY_DN10731_c0_g1_len=295	(A)10	CCCTTGACATAAAGGGAAACA	58.936	TGAGCTAGGTCATTGTTGCG	60.011
TRINITY_DN10892_c0_g1_i1_gene=TRINITY_DN10892_c0_g1_len=611	(ACA)7	CCAACAAAAATGAACATTCCA	58.374	GGAAGGAAGCTCAAACCTCA	59.405
TRINITY_DN10950_c0_g1_i1_gene=TRINITY_DN10950_c0_g1_len=977	(GTT)6	GACATCGTTTGGGTGTCAAA	59.394	CTTCGACCGAACACAGAACA	59.873
TRINITY_DN10951_c0_g1_i1_gene=TRINITY_DN10951_c0_g1_len=263	(A)13	CAAACAATGCAAGGTAACCAA	58.594	GGAGCAGTTTTGGAGGATCA	60.195
TRINITY_DN10958_c0_g1_i1_gene=TRINITY_DN10958_c0_g1_len=621	(T)10	CAAACCACCAGATGAAGCCT	60.111	CTCTCCATCGTCACATCCCT	60.072
TRINITY_DN10986_c0_g2_i1_gene=TRINITY_DN10986_c0_g2_len=457	(A)11	AAACATGAATCCATAACACCTCA	58.366	GGAAGAGCGAGCTGAAAGAA	59.836
TRINITY_DN1110_c0_g1_i1_gene=TRINITY_DN1110_c0_g1_len=475	(A)10	AAAGCCCAAATTGCACAAAG	60.11	TGGTCGACCTTAAAGTTTGGTT	59.907
TRINITY_DN11125_c0_g1_i1_gene=TRINITY_DN11125_c0_g1_len=526	(A)12	TCATGTGTGCACAAGAACCA	59.705	TGATGACAAAGAATTGCCCC	60.843
TRINITY_DN11158_c0_g1_i1_gene=TRINITY_DN11158_c0_g1_len=220	(A)12	GGCTTGGATGATTTGCCTAA	60.038	TTTCCATTTCGGTTACTGGG	59.795
TRINITY_DN11187_c0_g1_i1_gene=TRINITY_DN11187_c0_g1_len=237	(T)13	CTCCGAGGTATCTTCCTCCC	60.03	TGGAAACAGAAACGAAACATCA	60.514
TRINITY_DN11223_c0_g1_i1_gene=TRINITY_DN11223_c0_g1_len=755	(GA)6	CTGCACCAAGGCTAAGGAAG	60.008	TCGAATTCAATACCTCCAATCA	59.411
TRINITY_DN11242_c0_g1_i1_gene=TRINITY_DN11242_c0_g1_len=329	(T)10	TAGGAAGACCGTTTTGGTGG	59.964	CAAGTTCATGCGTACCTTCA	57.346
TRINITY_DN11249_c0_g1_i1_gene=TRINITY_DN11249_c0_g1_len=951	(A)12	ACAATAACCAACCTGCTGCC	60	GGTTATCAAGCAGCTCAGGG	59.836
TRINITY_DN11277_c0_g1_i1_gene=TRINITY_DN11277_c0_g1_len=1079	(TGT)5	GCAAATTCTGGGCACGTAGT	60.14	TTGACATCGTGACTTGGGAG	59.676
TRINITY_DN11450_c0_g1_i1_gene=TRINITY_DN11450_c0_g1_len=308	(ATC)6	GAAAACATGCCACCAACCTT	59.836	TCTTGTTTAGCTTATCAGCCATT	57.344
TRINITY_DN11495_c0_g1_i1_gene=TRINITY_DN11495_c0_g1_len=902	(CAA)5	TAACAATGCAGGCCAGAAAA	59.301	GTTGTTGATCGCGAGTCTGA	59.992
TRINITY_DN11652_c0_g1_i1_gene=TRINITY_DN11652_c0_g1_len=464	(T)10	GGAGAAGGTCTTTCTGGTCG	58.866	GCCTCAGAAGATGCAAAAGC	60.103
TRINITY_DN11672_c0_g1_i1_gene=TRINITY_DN11672_c0_g1_len=462	(TC)6	CGGTTTCCTCTGACATGGTT	59.966	TGAAAACACAAATTCAAACAAAGAA	59.944
TRINITY_DN11683_c0_g1_i1_gene=TRINITY_DN11683_c0_g1_len=322	(A)12	AAATTCGATCATGACCGTGC	60.874	TTTGTCTGAGAGGACACCCC	60.088
TRINITY_DN11686_c0_g1_i1_gene=TRINITY_DN11686_c0_g1_len=662	(TTC)5	GAGCCCCTGTTAACTCGAAA	59.312	GGCTATGCTTCTCTGTTGGC	59.985
TRINITY_DN11718_c0_g2_i1_gene=TRINITY_DN11718_c0_g2_len=935	(T)11	CGCATAACTTTGTTGTTTGCT	58.046	GACGCATCTTTCCCTAATCG	59.668
TRINITY_DN11803_c0_g1_i1_gene=TRINITY_DN11803_c0_g1_len=290	(A)10	AGGGCTCAACCTCCATCTGT	61.052	CTTTTCAACACTTGGGGCAT	59.971
TRINITY_DN11833_c0_g1_i1_gene=TRINITY_DN11833_c0_g1_len=1581	(CCA)6	CAACAACCTTACGCGCACTA	59.934	TGTTATTCTGCGCGATTGAG	59.976
TRINITY_DN11867_c0_g2_i1_gene=TRINITY_DN11867_c0_g2_len=310	(GA)6	CCCTTGAACAAAGCGAAGAG	59.986	TGCTCCTTTTCTCTCTCCCA	60.065
TRINITY_DN11907_c0_g1_i1_gene=TRINITY_DN11907_c0_g1_len=706	(AGA)5	TGTAACCGCAAATCACCAAA	59.969	ATTTTGCAGGTACCGATTGC	59.967
TRINITY_DN12071_c0_g1_i1_gene=TRINITY_DN12071_c0_g1_len=646	(GA)6	GATTTAGCGGCGAAACTGAG	59.982	CATTTCAAAACTTCATCTCCCTC	59.123
TRINITY_DN12093_c0_g1_i1_gene=TRINITY_DN12093_c0_g1_len=499	(AG)8	AGGAGCTCTTCCCATGGTTT	60.074	GGACTTCTGCTGTTTCATCTCTG	60.43
TRINITY_DN121_c0_g1_i1_gene=TRINITY_DN121_c0_g1_len=545	(T)11	CCGCGTACTCTCTTTTCTAATCA	59.926	GTGGAGCTTGCTAGAATGGG	59.836
TRINITY_DN12244_c0_g1_i1_gene=TRINITY_DN12244_c0_g1_len=218	(A)11	CAGGATCATCATTACCAATGGA	59.645	TCTTTCGTTATTTAGGGTTTTCG	58.785
TRINITY_DN12257_c0_g1_i1_gene=TRINITY_DN12257_c0_g1_len=959	(A)10	GTCACGTGGCAAGGAAAAAT	59.978	AGGGATAGGGAGACGAAAGC	59.674
TRINITY_DN12257_c0_g2_i1_gene=TRINITY_DN12257_c0_g2_len=918	(T)11	CATGATTTTTGCCGATGAAA	59.496	AAACAACACTGCCACCTTCC	60.012
TRINITY_DN12325_c0_g1_i1_gene=TRINITY_DN12325_c0_g1_len=313	(A)11	ACCATGGGTTAGCCTTTCCT	59.827	GTTTGTTCGCTGCTCATTCA	59.995
TRINITY_DN12340_c0_g1_i1_gene=TRINITY_DN12340_c0_g1_len=587	(AG)10	AACACGTGCTTGCTTCTTGA	59.64	ACAGCCAACAACGCTCTCTT	60.058
TRINITY_DN12372_c0_g1_i1_gene=TRINITY_DN12372_c0_g1_len=301	(T)10	AGGCATCAAAGAGGAACTGC	59.434	GCACATGGGTTAGCAGGATT	59.962
TRINITY_DN12575_c0_g1_i1_gene=TRINITY_DN12575_c0_g1_len=1567	(T)10	TGCTCTCAGAACCTTCAGCA	59.855	TTTCCTCTGCAACCAAAACC	60.088
TRINITY_DN12583_c0_g1_i1_gene=TRINITY_DN12583_c0_g1_len=408	(A)11	CAAGCTTTAATTCCATTGCCA	60.082	CCAGCTTTGGCTTTATCTCA	58.12
TRINITY_DN12595_c0_g1_i1_gene=TRINITY_DN12595_c0_g1_len=455	(A)10	ACCGCCTTTAAGTTGCAAGA	59.883	CCACGGTCGCTAGACTTTCT	59.496
TRINITY_DN12623_c0_g2_i1_gene=TRINITY_DN12623_c0_g2_len=515	(AG)7	TGCCGGGTGTTAGTTTTGTT	60.399	TCCATCTCTCCTCTCTCACCTT	59.439
TRINITY_DN12664_c0_g1_i2_gene=TRINITY_DN12664_c0_g1_len=791	(CT)6	AAACCTGCATAACACAGCCC	60	CAACAAGCCCTAAATCCCAA	59.931
TRINITY_DN12664_c0_g1_i2_gene=TRINITY_DN12664_c0_g1_len=791	(AG)7	AAAGGCAAGGGAGTACGGTT	59.998	TGGTCGCTGTTGTTACTTGC	59.911
TRINITY_DN12709_c0_g1_i1_gene=TRINITY_DN12709_c0_g1_len=230	(AT)7	TCCCAAGCAGAAATCCAAAC	60.051	TCATTGGTATTACATTAGGAGCAGA	59.122
TRINITY_DN12753_c0_g1_i1_gene=TRINITY_DN12753_c0_g1_len=513	(T)10	CAGAGCTCCATTGTGTATGGC	60.672	TTCTACGCCTTTGCCAAAAT	59.72
TRINITY_DN12766_c0_g1_i3_gene=TRINITY_DN12766_c0_g1_len=722	(CT)6	GACCGAAACAAACAAGGTTGA	60.001	GACGCGTTTGTCTGATTCAC	59.297
TRINITY_DN12784_c0_g1_i1_gene=TRINITY_DN12784_c0_g1_len=251	(A)10	CCACTACAAGAGAGAGAAATCAGAAA	59.517	TCAAGCAATCGAAAATGCAC	59.816
TRINITY_DN12815_c0_g1_i1_gene=TRINITY_DN12815_c0_g1_len=225	(A)10	TGGTGTTGTATGTGTTGGGTG	60.183	AATCATATGTGGTCATGTTATCTCA	57.475
TRINITY_DN12824_c0_g1_i1_gene=TRINITY_DN12824_c0_g1_len=573	(A)18	TCCGCTAGCATAAGCACTTG	59.23	CATCAATTTTTGTTTTATAGTGCG	57.928
TRINITY_DN12845_c0_g1_i2_gene=TRINITY_DN12845_c0_g1_len=284	(GA)8	GCCGTTGCCTAACACCTCTA	60.27	TCGGAGATTCGTCATCCTTT	59.629
TRINITY_DN12848_c0_g1_i1_gene=TRINITY_DN12848_c0_g1_len=325	(T)10	CAACCCAAGAACCATTTTTGA	59.825	TCCATATTGTGTGGGCATTG	60.197
TRINITY_DN12856_c0_g1_i1_gene=TRINITY_DN12856_c0_g1_len=381	(GA)8	GAAGGCCGCAGTTTCTACAG	60.015	CAACAACATTTTCGTCAAGGA	58.661
TRINITY_DN13037_c0_g1_i2_gene=TRINITY_DN13037_c0_g1_len=222	(A)10	TCCAGTGCATCATTTGGAAT	58.926	TCACTGAAGCCTCGGAGAAT	59.95
TRINITY_DN13076_c0_g1_i1_gene=TRINITY_DN13076_c0_g1_len=341	(A)10	AGAAACGCGTCTAGTCGGAG	59.639	TTCGTTTGAATTCGTTGAGAGA	59.861
TRINITY_DN13081_c0_g1_i1_gene=TRINITY_DN13081_c0_g1_len=656	(TC)8	TGGCTCAAGAACACAAAGGA	59.415	AACCAATCGTGGAATCGAAG	59.933
TRINITY_DN13126_c0_g1_i1_gene=TRINITY_DN13126_c0_g1_len=458	(A)10	CATGTGTCAGACTCGGATCG	60.27	GGCAGTGTGTCGAAGGAAAT	60.119
TRINITY_DN13186_c0_g1_i1_gene=TRINITY_DN13186_c0_g1_len=436	(T)11	GAAAAACGTCGCATCATCCT	60.081	TCCTTTCTTCTTCACCCAGC	59.405
TRINITY_DN13249_c0_g1_i1_gene=TRINITY_DN13249_c0_g1_len=220	(TGA)6	AGTGGTGTGTGGTTTTGTTGA	58.944	GAGTTAATACTTCAGCTCAACCAGTTT	59.717
TRINITY_DN13278_c0_g1_i1_gene=TRINITY_DN13278_c0_g1_len=607	(A)13	CCAAAACGTAACAAAATCAATGC	60.603	CCTGTGTAACGATGCCCTTT	59.993
TRINITY_DN13279_c0_g1_i2_gene=TRINITY_DN13279_c0_g1_len=391	(CAT)5	TGCAGTTTTCTTTTCCCTGC	60.365	CAACAAATACCTTTACAGTCCAAAA	58.647
TRINITY_DN13283_c0_g1_i1_gene=TRINITY_DN13283_c0_g1_len=296	(T)12	TGCGCTCATTTGAAAACTTG	59.992	CCCTTGATGGATTGAGTACAGA	59.052
TRINITY_DN13426_c0_g1_i1_gene=TRINITY_DN13426_c0_g1_len=415	(A)14	CATGTTTGATCCATAACGTGTG	58.822	TTTTTCTTGTAATTCTCGCTTCAA	59.472
TRINITY_DN13455_c0_g2_i1_gene=TRINITY_DN13455_c0_g2_len=547	(TTA)5	ACACAACGAGGGTGTTCCTC	60.009	TGTATGGCGGGGTAGTAGGA	60.344
TRINITY_DN13458_c0_g1_i1_gene=TRINITY_DN13458_c0_g1_len=379	(A)10	TGCGAAATTGATTTCAGTGC	59.816	CAACTATTGGCCCTACCCAA	59.817
TRINITY_DN13472_c0_g1_i1_gene=TRINITY_DN13472_c0_g1_len=495	(GA)6	TGGTAGTGAGGAGAGAGATGTGG	60.686	TTATTGGCTAAGGTGTCCGC	60.096
TRINITY_DN13476_c0_g1_i1_gene=TRINITY_DN13476_c0_g1_len=724	(A)11	CAATCAAACAATCGCAGAACA	59.72	ATGAAATTGGGATTTGGGAA	59.067
TRINITY_DN13495_c0_g1_i1_gene=TRINITY_DN13495_c0_g1_len=404	(A)11	TAATGTGTTGGCATGCGAGT	60.142	CAGGATCCATCCAAATATACGC	60.536
TRINITY_DN13536_c0_g1_i1_gene=TRINITY_DN13536_c0_g1_len=310	(CGT)5	AGGTTCAAACCACCCAAGTC	58.891	TGGATGCAGTTTTTGTGATTT	58.134
TRINITY_DN13569_c0_g1_i1_gene=TRINITY_DN13569_c0_g1_len=442	(TA)6	CGCTCAAATGTTTGCATGTT	59.735	CGCATGCAACCTTGTTTTTA	59.742
TRINITY_DN13651_c0_g1_i1_gene=TRINITY_DN13651_c0_g1_len=387	(AG)9	GGCGGGAGTTGTGTTAGTGT	60.035	TGATCAATCATTCTCACCTCTTG	59.184
TRINITY_DN13653_c0_g1_i1_gene=TRINITY_DN13653_c0_g1_len=865	(T)12	CCGATTTTCTTCTCCTTTCA	57.007	TCTCACCCGGTTATTCATCC	59.75
TRINITY_DN13688_c0_g1_i1_gene=TRINITY_DN13688_c0_g1_len=932	(T)10	GACAACCTGGCAGTTTCCAT	59.973	GTGACCGACGAAAACTCGAT	60.119
TRINITY_DN13734_c0_g1_i1_gene=TRINITY_DN13734_c0_g1_len=264	(T)11	CGCTTCTTCTTCATCGCTCT	59.859	GCATTGGAAGCAGTAGCAGA	59.178
TRINITY_DN13792_c0_g1_i1_gene=TRINITY_DN13792_c0_g1_len=517	(A)10	TCACAATGTCAAAAAGCATTCTC	59.261	TGCATTTCCATTTTTATTGCAT	59.351
TRINITY_DN13792_c0_g1_i1_gene=TRINITY_DN13792_c0_g1_len=517	(A)10	TCACAATGTCAAAAAGCATTCTC	59.261	TGCATTTCCATTTTTATTGCAT	59.351
TRINITY_DN13827_c0_g2_i1_gene=TRINITY_DN13827_c0_g2_len=298	(T)10	GAGTGCGAGTAAGAGTCGGC	60.164	AAACAGAACGCTGGTCGAAG	60.431
TRINITY_DN13880_c0_g1_i1_gene=TRINITY_DN13880_c0_g1_len=606	(T)10	TAGCCTCCGTTACACTGCCT	59.898	CCCAAAATTTCTCAAGCAGC	59.823
TRINITY_DN13983_c0_g1_i1_gene=TRINITY_DN13983_c0_g1_len=371	(A)10	CGCACTTTCCAGCTTCTCTT	59.757	TGTGAACAAAGGGGACGTTT	60.388
TRINITY_DN14003_c0_g1_i1_gene=TRINITY_DN14003_c0_g1_len=531	(AT)8	TCCTCCAATGTTGTTGTCCA	59.935	ACTAGGCGCACTTGTTGGAT	59.763
TRINITY_DN14064_c0_g1_i2_gene=TRINITY_DN14064_c0_g1_len=743	(T)10	ACCAAGCCTTTGTCATCACC	59.973	CTAGCAACAATCCCAAACCC	59.429
TRINITY_DN14069_c0_g1_i2_gene=TRINITY_DN14069_c0_g1_len=630	(AT)7	ACCATGTGTGCATGTCTTCC	59.399	GCAGTAGGAGGGGACAGTTG	59.721
TRINITY_DN14076_c0_g1_i1_gene=TRINITY_DN14076_c0_g1_len=218	(A)12	AGCATGCAAATATGGAGCAA	59.285	AAATTTTCATTCTCATTCTTTCTTACA	58.084
TRINITY_DN14079_c0_g1_i1_gene=TRINITY_DN14079_c0_g1_len=759	(T)11	AGGTCAAGCAAGCTGGGTAA	59.875	TTTTCTTCTGGAGGGTGGGT	60.852
TRINITY_DN14086_c0_g1_i1_gene=TRINITY_DN14086_c0_g1_len=3855	(T)10	AGTGGCGAGAACAAGAGGAA	59.989	CCGCCAAAATTTATGACTTACC	59.748
TRINITY_DN14112_c0_g1_i1_gene=TRINITY_DN14112_c0_g1_len=568	(CAA)6	GCAGGTTTGGGCACACTTAT	60	GGTAATTGCAGTTTCCCCCT	60.187
TRINITY_DN14112_c0_g1_i1_gene=TRINITY_DN14112_c0_g1_len=568	(A)11	GCAGGTTTGGGCACACTTAT	60	GGTAATTGCAGTTTCCCCCT	60.187
TRINITY_DN14185_c0_g1_i1_gene=TRINITY_DN14185_c0_g1_len=1584	(AGA)6	CTTTCAAGAACCGCACAACA	59.881	CCACAAGCAAGGGGTAAAGA	60.103
TRINITY_DN14185_c0_g1_i1_gene=TRINITY_DN14185_c0_g1_len=1584	(ATC)5	TGGCCTAGAATGCTTCTCCT	59.031	CGGTGAAAGATTGTGAGGGT	59.966
TRINITY_DN14187_c0_g1_i1_gene=TRINITY_DN14187_c0_g1_len=722	(A)11	TCACCAACACAACACCAACC	60.309	AGTCGAAATTGCATCAAGCC	60.221
TRINITY_DN14260_c0_g2_i1_gene=TRINITY_DN14260_c0_g2_len=1761	(A)10	AACCAAATTCACGTGGAAGC	59.978	CCACCGGTATACTCCCAAAA	59.679
TRINITY_DN14279_c0_g1_i1_gene=TRINITY_DN14279_c0_g1_len=1170	(TTG)5	GAGTCCTCGATATATGCCGC	59.656	AGCTAAAGACCCTCCGTCGT	60.268
TRINITY_DN14304_c0_g1_i2_gene=TRINITY_DN14304_c0_g1_len=608	(TGG)5	ATGCTGACATTTTAAGCCGC	60.238	TTCTCCATCCTTTTCTCCGA	59.744
TRINITY_DN14451_c0_g1_i1_gene=TRINITY_DN14451_c0_g1_len=359	(TCT)5	ACCAGTATGCCCCACTGAAG	59.989	TGCAGTGGCTTTTCCATACA	60.257
TRINITY_DN14451_c0_g2_i1_gene=TRINITY_DN14451_c0_g2_len=462	(TC)8	GGCTATATGCACCTCCCTTG	59.551	GGGTGTGAACTGAAGACGGT	60.009
TRINITY_DN14486_c0_g2_i1_gene=TRINITY_DN14486_c0_g2_len=976	(TTG)7	TAATTGCAATGCCATGGTTG	60.334	GATACATTTGCACACACCGC	60.003
TRINITY_DN14518_c0_g2_i1_gene=TRINITY_DN14518_c0_g2_len=246	(TG)6	GCTTGGTTTGGATGGATGAT	59.756	GCATGGCATTATGGTGAAGA	59.504
TRINITY_DN14552_c0_g2_i1_gene=TRINITY_DN14552_c0_g2_len=745	(A)11	CCCAACCCAACAATAGGAAA	59.657	CCCTAAGTCAAGGCTCCTCC	60.204
TRINITY_DN14583_c0_g1_i1_gene=TRINITY_DN14583_c0_g1_len=370	(T)11	CACAAGATTAGGCTCGGTCG	60.786	GAGGGTCGCTGTTGAGTTTT	59.333
TRINITY_DN14637_c0_g2_i1_gene=TRINITY_DN14637_c0_g2_len=735	(TTG)5	CACCAACACAATTCCAAAACA	59.327	TGTGTGTCGATGGAGGGTAA	59.96
TRINITY_DN14637_c0_g2_i1_gene=TRINITY_DN14637_c0_g2_len=735	(AG)6	CCCTTTTTCATGTTTTGCATC	59.442	TCAGAGAAACAACATCACACCC	60.012
TRINITY_DN14641_c0_g2_i1_gene=TRINITY_DN14641_c0_g2_len=325	(A)10	CCGACTTCTTTTCCATTTTGTT	59.518	CCATTTGTGTTCATTGCACC	59.823
TRINITY_DN14679_c0_g1_i4_gene=TRINITY_DN14679_c0_g1_len=568	(CTT)5	ATTGGAAAGGATTGCGTTTG	59.938	TCACAGTTGAATCCCGATGA	60.048
TRINITY_DN14682_c0_g1_i2_gene=TRINITY_DN14682_c0_g1_len=676	(A)10	CAACGATGTTTCTAGACCGCT	59.392	TGTTAATTTTTGGGTGGAAAA	57.112
TRINITY_DN14716_c0_g1_i1_gene=TRINITY_DN14716_c0_g1_len=209	(AC)6	GATGATGAAGAAGAACGGCG	60.744	TGGAAATGGAAAGGTCACTG	58.541
TRINITY_DN14758_c0_g1_i1_gene=TRINITY_DN14758_c0_g1_len=643	(A)10	GCTCCTGAGAGACACGATCC	59.952	TTGATGCATGTGTAGTGCCA	59.701
TRINITY_DN14767_c0_g1_i1_gene=TRINITY_DN14767_c0_g1_len=268	(A)10	GGACGATGGGGAACAATGTA	60.582	TTTGATGAGACGGTGTGCTT	59.293
TRINITY_DN14832_c0_g1_i1_gene=TRINITY_DN14832_c0_g1_len=585	(T)12	AAAAGGTGTGCCATCACCAC	60.823	TTTGGAAGCATTTGATTTGC	58.746
TRINITY_DN14868_c0_g1_i1_gene=TRINITY_DN14868_c0_g1_len=287	(GTT)5	GGATTAGTCTCGGGAGGGAC	59.896	TAAAACACGCTTTCTCCCCA	60.608
TRINITY_DN14874_c0_g1_i2_gene=TRINITY_DN14874_c0_g1_len=722	(GGA)5	CCAAGAATTGCACAGCAAAA	59.849	AGTACTGTTCCAGAAACTGCAAA	58.125
TRINITY_DN14877_c0_g3_i1_gene=TRINITY_DN14877_c0_g3_len=585	(CA)6	CTCTCACCAAGTCTCTCGGG	59.978	ACCGTAACCTAAGCCCCATT	59.725
TRINITY_DN14879_c0_g1_i1_gene=TRINITY_DN14879_c0_g1_len=387	(A)10	CCCAAGTGTTAAACCAAAGGTC	59.778	TTGTTTTCTTGAACTCTTTCATTTG	58.933
TRINITY_DN14881_c0_g1_i1_gene=TRINITY_DN14881_c0_g1_len=487	(A)10	CAGTCAAATCTCCCGCTCAT	60.218	TTCAATTTCGTCTACAGAAAGCA	59.065
TRINITY_DN14889_c0_g1_i1_gene=TRINITY_DN14889_c0_g1_len=2000	(AGC)5	ATTCGCGATTCAACTTCTGG	60.214	AATGAGTTGGGACATGGAGC	59.934
TRINITY_DN14890_c0_g1_i1_gene=TRINITY_DN14890_c0_g1_len=468	(A)11	AATAGTTCAAATCCAACAAAGAAATC	58.232	TCGTGTGTTGATCAATCCGT	59.967
TRINITY_DN14898_c0_g2_i1_gene=TRINITY_DN14898_c0_g2_len=570	(CA)7	CATGCCCTTTCAATGTTCCT	59.933	TGCTGTTGCAACTTTTGGTC	59.888
TRINITY_DN14901_c0_g1_i2_gene=TRINITY_DN14901_c0_g1_len=1711	(GA)8	AACCACCGTTGAAATTCTGG	59.83	GATTCCGAAGCGGTTAAAGA	59.297
TRINITY_DN14903_c0_g1_i1_gene=TRINITY_DN14903_c0_g1_len=589	(T)10	TGAACCCGAGACCTTGCTTA	60.766	TGTGAGAAAAAGTGGGGGAG	60.081
TRINITY_DN14971_c0_g1_i1_gene=TRINITY_DN14971_c0_g1_len=495	(GAG)5	TGCCAAGAAAAGGCCAAATA	60.56	TTCAACCATGACCAAACCAA	59.792
TRINITY_DN15005_c0_g1_i1_gene=TRINITY_DN15005_c0_g1_len=274	(A)10	CCAAGAGGCCCAATAACAGA	60.066	CATAATTCAGCCAAGGAAATCA	59.078
TRINITY_DN15008_c0_g1_i1_gene=TRINITY_DN15008_c0_g1_len=296	(A)10	GCGGTTGTGAAAAGGAGAAA	60.227	TTTCGATTCCTTCATTGCGT	60.585
TRINITY_DN15024_c0_g1_i2_gene=TRINITY_DN15024_c0_g1_len=550	(T)12	AACAGAATCTGGGTGGAACG	59.966	TTCATATCTCCCCACCATCC	59.563
TRINITY_DN15044_c0_g1_i1_gene=TRINITY_DN15044_c0_g1_len=768	(A)12	AACCAAACCCAACCTCACAA	60.246	TGGAGAGCTTGCATTGATGT	59.399
TRINITY_DN1511_c0_g1_i1_gene=TRINITY_DN1511_c0_g1_len=305	(A)10	AGGACAATTCCACCCATGAT	59.068	AAGGTTGCATCCCACTTGTC	59.973
TRINITY_DN15111_c0_g1_i1_gene=TRINITY_DN15111_c0_g1_len=388	(A)10	GAGAGAAAAATCCGTGGCTG	59.813	GCATGCATTAAGCAAATAACG	58.4
TRINITY_DN15135_c0_g1_i1_gene=TRINITY_DN15135_c0_g1_len=1047	(AGT)5	TCTCAAGCTCTTCCTCCAGC	59.827	CCATCTTTGGCGAACGTATT	59.96
TRINITY_DN15167_c0_g1_i1_gene=TRINITY_DN15167_c0_g1_len=420	(ACA)6	TCTGCTTCTCTCAAGCGACA	60.008	ATTTTTCCGGATTGAGGGAG	60.258
TRINITY_DN15218_c0_g1_i1_gene=TRINITY_DN15218_c0_g1_len=1050	(ACG)5	TGCTGAGCCACTTGAATTTG	59.988	TCTCAATGCAAACACAACGA	58.835
TRINITY_DN15225_c0_g2_i1_gene=TRINITY_DN15225_c0_g2_len=237	(TAT)5	GCAATCGGAAACAGACACCT	60.119	TGGTTTCTCTTCAACTTTCTGC	58.627
TRINITY_DN15279_c0_g1_i4_gene=TRINITY_DN15279_c0_g1_len=864	(AT)8	TCCGCCATGAATAATTTGGT	60.153	GCGAGCTAACGCTCAGAATC	60.265
TRINITY_DN15286_c0_g1_i1_gene=TRINITY_DN15286_c0_g1_len=579	(A)10	TGACGATCCATTCTGGTCAA	60.048	CCTTTGAAATCTACATGGGAGG	59.829
TRINITY_DN15321_c0_g2_i1_gene=TRINITY_DN15321_c0_g2_len=299	(A)10	AGCAAAAGCTGCAAAGTGGT	60.059	CCCCTCATCTATTCACCTTCA	58.992
TRINITY_DN15347_c0_g1_i1_gene=TRINITY_DN15347_c0_g1_len=499	(TA)6	CCAACCAACAATGGCTTCTT	59.971	GATTACAGTCCACCGTGCCT	59.997
TRINITY_DN15362_c0_g3_i1_gene=TRINITY_DN15362_c0_g3_len=591	(T)10	GAATTTGGAGATGCCACCAC	60.326	TCCACGCATCTTCTTTCACA	60.39
TRINITY_DN15382_c0_g1_i2_gene=TRINITY_DN15382_c0_g1_len=492	(T)11	GAATCCAAGAGCATTCGAAAA	59.287	CCATGGATTGCGCTAAAAAT	59.928
TRINITY_DN15388_c0_g1_i2_gene=TRINITY_DN15388_c0_g1_len=265	(CT)9	AAGATTCACGGTGGTTCAGG	59.966	CGGGGTTCATTTTTCCACTT	61.069
TRINITY_DN15444_c0_g1_i1_gene=TRINITY_DN15444_c0_g1_len=660	(T)10	TCAAATGCAGAAAGCTTGAAGT	59.158	TGGGAAAGCTTTTTCTGTTGA	59.847
TRINITY_DN15481_c0_g1_i1_gene=TRINITY_DN15481_c0_g1_len=285	(T)10	CAAAATAATCCACCTTATTTCTTTTAG	57.319	TGACTTGACGTCTCTGTGGC	60.03
TRINITY_DN15485_c0_g1_i2_gene=TRINITY_DN15485_c0_g1_len=651	(ATT)5	ACCATGAAATTGGGCTTGAG	59.933	ACAAGGAGACACAAAACGCC	60.156
TRINITY_DN15588_c0_g1_i1_gene=TRINITY_DN15588_c0_g1_len=566	(A)10	CGCAAAAGAATGTAAAAGCG	58.632	CAGCAAAAGCTGCGGACTAT	60.543
TRINITY_DN15646_c0_g1_i1_gene=TRINITY_DN15646_c0_g1_len=372	(A)14	ATTGCTTTTTCCACCACCTG	59.971	TGAATGCTACAATATCCGTCCA	60.343
TRINITY_DN15655_c0_g1_i3_gene=TRINITY_DN15655_c0_g1_len=641	(G)12	GCTGCAACCTTGATGCTATTC	59.866	AGAAGCGGTGGTTTTAGGGT	59.998
TRINITY_DN15734_c0_g2_i1_gene=TRINITY_DN15734_c0_g2_len=620	(GA)9	AACGAAGCTCGAAGGATTCA	59.955	TGTTTCAGCAACAACAAATGA	57.808
TRINITY_DN15779_c0_g2_i1_gene=TRINITY_DN15779_c0_g2_len=345	(A)10	GCTTCAATATGCCTATCCATGA	59.061	TTTCAAACCCAACACCTTCTG	59.994
TRINITY_DN15780_c0_g1_i1_gene=TRINITY_DN15780_c0_g1_len=1120	(TGG)8	TGATGTTGTTGTCAGCGGTT	60.16	AACCATGGACCAAACGAAAA	60.206
TRINITY_DN15783_c0_g1_i1_gene=TRINITY_DN15783_c0_g1_len=587	(T)10	TATTGCATTTATTGCGTGGC	59.567	AAAATCGCAGCCCTTAACCT	60.095
TRINITY_DN15798_c0_g1_i3_gene=TRINITY_DN15798_c0_g1_len=1553	(A)11	GAGCTAATTTCTTAAGCCCAGAA	58.314	GTAACCATGGCAGTGGCTTT	60
TRINITY_DN15799_c0_g1_i4_gene=TRINITY_DN15799_c0_g1_len=686	(A)10	TGTCAAACCTTTTCGCCTCT	59.853	TGGAGCCTTAGGGTAATCCC	60.278
TRINITY_DN15806_c0_g1_i1_gene=TRINITY_DN15806_c0_g1_len=496	(A)10	ATATTGTGAAGGGCACAGGC	59.962	TCTTTCCCGCATTTCTTTTG	60.181
TRINITY_DN15831_c0_g2_i1_gene=TRINITY_DN15831_c0_g2_len=845	(A)10	CACACCAACACTTTACTCTCCC	58.625	TTTCTTTGCTGGGTTGATTTG	60.096
TRINITY_DN15842_c0_g1_i1_gene=TRINITY_DN15842_c0_g1_len=614	(TTG)5	AAGAGGATCTGGAGAACTGGG	59.685	TGTATTTCTCCATGGCGTTG	59.542
TRINITY_DN15884_c0_g1_i1_gene=TRINITY_DN15884_c0_g1_len=925	(GA)7	CACCTTCATTTACTTGCACCA	58.687	AAAGCTTAATGAAAGCTCAATGCT	59.955
TRINITY_DN1589_c0_g1_i1_gene=TRINITY_DN1589_c0_g1_len=353	(A)10	TCCTCTCCTTCATCTTCCCTC	59.763	CTTTTAGCGCGGAGAATTTG	59.979
TRINITY_DN15905_c0_g1_i4_gene=TRINITY_DN15905_c0_g1_len=1227	(A)12	TGGATGAAGTTGCAAAGCTG	59.988	TGCATTCTTGGTGTGGAAGA	60.24
TRINITY_DN15945_c0_g1_i4_gene=TRINITY_DN15945_c0_g1_len=428	(A)10	CCTGAACCATCGCTTATGCT	60.235	TGGAAGCGAGTTTTGGAGTT	59.853
TRINITY_DN15968_c0_g1_i1_gene=TRINITY_DN15968_c0_g1_len=316	(T)10	GAGGTTTCTCGCACAACTCC	59.851	TACCTGAAATTGGAGGCGAC	60.074
TRINITY_DN16021_c0_g1_i1_gene=TRINITY_DN16021_c0_g1_len=845	(A)12	CCCTCGGTTTTCCATCATAA	59.756	GCCAAGTTGTCCAGATCCTC	59.661
TRINITY_DN16027_c0_g1_i1_gene=TRINITY_DN16027_c0_g1_len=1116	(T)14	GCGGCAACAGAGGTAGAAAG	60.015	AAATGCAGCAGATGAAACCC	60.081
TRINITY_DN16027_c0_g1_i1_gene=TRINITY_DN16027_c0_g1_len=1116	(TTG)5	TCTCTTCGCCAAGTTGGTTT	59.853	CTTTCTACCTCTGTTGCCGC	60.015
TRINITY_DN16102_c0_g2_i1_gene=TRINITY_DN16102_c0_g2_len=716	(T)10	TGCAAAAACATCCTATGCCA	60.073	ATAAGCTGTGGGTTCGTTGG	59.993
TRINITY_DN16108_c0_g1_i2_gene=TRINITY_DN16108_c0_g1_len=384	(A)10	TGGGAGATATTAAATTGGAAGTGA	58.924	ATTGTTACTCCCTCGGTCCC	60.19
TRINITY_DN16118_c0_g1_i1_gene=TRINITY_DN16118_c0_g1_len=2901	(A)12	AGCCTTTTAAGCCCATCCAT	59.93	CAAAGTCGTGCCATTACCCT	59.993
TRINITY_DN16131_c0_g1_i1_gene=TRINITY_DN16131_c0_g1_len=663	(GGT)5	GTTCCATGATGCCTCCATTT	59.756	AACCTCCCCATTCATCATCA	60.135
TRINITY_DN16160_c0_g1_i2_gene=TRINITY_DN16160_c0_g1_len=1590	(TTA)12	ATGCACTCGATGCTTGTCTG	60.016	GCACATGCAAAACAGAATGG	60.119
TRINITY_DN16168_c0_g1_i1_gene=TRINITY_DN16168_c0_g1_len=528	(T)10	CCGGATCCGAGTTTCTCTCT	60.725	AATTCCCTCCCAAAATCCAG	60.124
TRINITY_DN16180_c0_g1_i1_gene=TRINITY_DN16180_c0_g1_len=576	(ATG)5	CCTTCAAGAAACCCAATCCA	59.903	CCAACGTTTGAACAACAACG	60.043
TRINITY_DN16225_c0_g1_i3_gene=TRINITY_DN16225_c0_g1_len=835	(A)13	AAGCTGATGATGGAAGAGGG	59.239	TTTCATCCTTCACGTTTCCC	59.91
TRINITY_DN16238_c0_g2_i1_gene=TRINITY_DN16238_c0_g2_len=1153	(ATT)5	CAAACGAGTGGGTCTTTGGT	60.005	TAACCTCGCCGACAGAAAAT	59.708
TRINITY_DN16251_c0_g1_i1_gene=TRINITY_DN16251_c0_g1_len=1441	(TCA)6	ATTCAACAAAACCTCGCACC	59.978	ATGCAGTGCACCAAGAGACA	60.473
TRINITY_DN16251_c0_g1_i1_gene=TRINITY_DN16251_c0_g1_len=1441	(A)12	CTGCTTGCAAAGTTGTGCTC	59.788	GCTTTCAAGAGGCTTTGGTG	59.993
TRINITY_DN16255_c0_g1_i1_gene=TRINITY_DN16255_c0_g1_len=528	(A)10	CCAAACGTGTATGCTTCCAA	59.585	ATGTGGTTCGTGAGGGAGAG	60.112
TRINITY_DN16261_c0_g1_i1_gene=TRINITY_DN16261_c0_g1_len=268	(GAT)5	CGAAGGGAAGATGGAATTGA	60.006	GCGTGAATTGAGAGGAGAGG	59.95
TRINITY_DN16264_c0_g1_i2_gene=TRINITY_DN16264_c0_g1_len=512	(A)12	TGCCTGAAACTAAAACTAACTGGA	59.387	TTAGAGGGTATTTGGCCGTG	59.953
TRINITY_DN16270_c0_g1_i1_gene=TRINITY_DN16270_c0_g1_len=233	(AAG)6	CAACACCAATAATCTGCAGGC	60.517	CGGAATTCGAAACCCAGAT	59.879
TRINITY_DN16323_c0_g1_i1_gene=TRINITY_DN16323_c0_g1_len=448	(AAT)5	CCCAAGTAAATTTCAAGAAAGCA	59.667	TTCCTGACCATAACCAAGCC	59.933
TRINITY_DN16333_c0_g1_i1_gene=TRINITY_DN16333_c0_g1_len=335	(T)10	TAGAGCGTGCTGTTGAATGG	60.011	GGGGGCAGATTGAAAAAGC	61.835
TRINITY_DN16356_c0_g1_i2_gene=TRINITY_DN16356_c0_g1_len=304	(A)13	GCTATCATCAGCGCAACAAA	59.983	TTACCCCCGATGGACAATAA	60.009
TRINITY_DN16370_c0_g2_i1_gene=TRINITY_DN16370_c0_g2_len=441	(TTG)6	GAATCTGAGCCAAGGAACCA	60.195	GCTTTTGAATTGGCCAAAAA	60.054
TRINITY_DN16395_c1_g1_i1_gene=TRINITY_DN16395_c1_g1_len=2224	(A)11	ACAACAGGGATTGGGTTTTG	59.688	GCAGGTTGTTGAGAGCCATT	60.263
TRINITY_DN16421_c0_g2_i1_gene=TRINITY_DN16421_c0_g2_len=289	(GA)6	AGTGAAGTGAGGTGAGGTGTTT	57.821	TTCCTCATCTATTCCTGCCC	59.08
TRINITY_DN16435_c0_g1_i5_gene=TRINITY_DN16435_c0_g1_len=1288	(T)11	TAGAGGAGGAGAAGCCGACA	60.088	GGTGGAAGATGTAGAGGTTGGA	60.361
TRINITY_DN16482_c0_g1_i1_gene=TRINITY_DN16482_c0_g1_len=1168	(A)10	GATCTCCATTTTCGGCTCAA	60.155	CTTTTTCTCGCCGCTTTCTT	60.966
TRINITY_DN16489_c0_g1_i2_gene=TRINITY_DN16489_c0_g1_len=2851	(AAG)5	GGACGTGGTTGAAGAAATGAA	59.963	GGCATCTCACTCTCGATCTTCT	59.986
TRINITY_DN16521_c0_g1_i1_gene=TRINITY_DN16521_c0_g1_len=343	(TC)8	ATACACCGCAGAATCGAAGG	60.096	AAGGTGAGGCTGTTAAACAAACA	60.082
TRINITY_DN16528_c0_g1_i1_gene=TRINITY_DN16528_c0_g1_len=890	(ATT)5	CAAAAGTGTTGCAAAAACTCAA	58.06	CTCCTTGGGCTGATGATTGT	60.073
TRINITY_DN16528_c0_g1_i1_gene=TRINITY_DN16528_c0_g1_len=890	(TTC)5	TCCACTTCCCAAAATCCATC	59.727	TTCGACGAGCTCGAAGAGTA	58.9
TRINITY_DN16529_c0_g1_i1_gene=TRINITY_DN16529_c0_g1_len=548	(GA)6	CTCTGGCATTTCAAGAAGGG	59.807	CAAAGAAGAATCATTTTGCATCA	59.244
TRINITY_DN16562_c0_g1_i1_gene=TRINITY_DN16562_c0_g1_len=1134	(A)11	GGGGTGCTCAATAGAAATGG	59.387	AGAGAAAGAGGGGAGGGGTT	60.43
TRINITY_DN16582_c0_g1_i1_gene=TRINITY_DN16582_c0_g1_len=436	(T)14	ACCCAAGCAAGACAAGGATT	58.646	GATAGTATCCGCGGAGGTGA	60.059
TRINITY_DN16655_c0_g1_i1_gene=TRINITY_DN16655_c0_g1_len=1959	(CTT)6	ACGGAAAACGTGAAGGGTAG	59.097	CCAAGATGCTGATGTTCAGG	59.241
TRINITY_DN16664_c0_g1_i1_gene=TRINITY_DN16664_c0_g1_len=942	(TA)17	GGCATCAATTGAGCTCTTGG	60.744	AAGAGCTGTCAAACGTGCAA	59.64
TRINITY_DN16683_c0_g1_i2_gene=TRINITY_DN16683_c0_g1_len=356	(TCA)8	CCTGCTACCCACATCGTTCT	60.134	CGGAGGAAGGTGATGTCAGT	60.112
TRINITY_DN16685_c0_g1_i1_gene=TRINITY_DN16685_c0_g1_len=1522	(T)10	AGTCCAACCGGTGGTCTATG	59.844	CGTTTCGAGTAAAATTTTTCGTTT	59.948
TRINITY_DN16685_c0_g1_i1_gene=TRINITY_DN16685_c0_g1_len=1522	(A)10	TAATTTGGCTTGGTTGAGGG	59.931	TGGATTAATCACAGCGCATT	59.14
TRINITY_DN16707_c0_g1_i1_gene=TRINITY_DN16707_c0_g1_len=461	(T)10	CATTATTGGCTCCCCCTGTA	59.778	TGCCTCTTAACACCTCTAACTCAA	59.492
TRINITY_DN16743_c0_g2_i1_gene=TRINITY_DN16743_c0_g2_len=692	(GA)6	GGTTTTAGGGTGGTCGGATT	60.053	GGTGATTATTCACTTTCTCTTCCC	59.407
TRINITY_DN16754_c0_g1_i2_gene=TRINITY_DN16754_c0_g1_len=1520	(TA)6	GCGCGAAACTTTTGAATCTC	59.967	AAAAGACTCTTCCAAGGTCTCTATTA	57.504
TRINITY_DN16757_c0_g1_i1_gene=TRINITY_DN16757_c0_g1_len=681	(A)12	TGCAATCTTCTAGCCCCAAT	59.668	CCTTCCCATCTCCACTCTCA	60.191
TRINITY_DN16768_c0_g1_i1_gene=TRINITY_DN16768_c0_g1_len=1004	(AT)6	GTCTCAGGGAATTGATCGGA	60.011	TTATTACCTTCGAAAGCACGC	59.398
TRINITY_DN16800_c0_g2_i1_gene=TRINITY_DN16800_c0_g2_len=614	(A)12	GCCAAGCCCTCTATGAAGGT	60.599	TCTGCCTTATCCCGTGTTTC	60.074
TRINITY_DN16802_c0_g1_i1_gene=TRINITY_DN16802_c0_g1_len=403	(T)10	TGGAGTTCAAGCCATCACAG	59.831	CCCCATACTAAACCTTGGTGC	60.598
TRINITY_DN16805_c0_g2_i1_gene=TRINITY_DN16805_c0_g2_len=281	(TGT)5	CGAAACAGAGCCGATGAAAT	60.214	ACCTCTGTGCAATCGCTTCT	60.02
TRINITY_DN16808_c0_g1_i1_gene=TRINITY_DN16808_c0_g1_len=592	(AC)6	CCCATTTTCAGAAGGACCAA	59.903	TGGTGTGCATGTGTATGTGTG	59.929
TRINITY_DN16823_c0_g1_i1_gene=TRINITY_DN16823_c0_g1_len=317	(TTC)5	CTCTGAACCCAAGCCAGTTC	59.844	GCAGTGTTCGCTCCAACTAA	59.076
TRINITY_DN16823_c1_g1_i1_gene=TRINITY_DN16823_c1_g1_len=549	(GAA)5	AAGAAAAATCCTCAAGGACCG	59.58	TCTCTGAACCCAAGCCAGTT	59.844
TRINITY_DN16826_c0_g1_i1_gene=TRINITY_DN16826_c0_g1_len=677	(T)10	TCCCTAATTGATTCACAATCCC	60.02	ATCATCTCCCCCGTCTTCTT	59.896
TRINITY_DN16845_c0_g1_i1_gene=TRINITY_DN16845_c0_g1_len=412	(A)10	GTGGCTGTGAATGATTGTGG	59.967	CTCCGTAACCAACCTTGCAT	59.993
TRINITY_DN16865_c0_g1_i1_gene=TRINITY_DN16865_c0_g1_len=743	(T)10	TCCAACCTTCAATCTCCATTT	58.491	TGGATGTTAAAGACAAAGGTTGG	60.255
TRINITY_DN1690_c0_g1_i1_gene=TRINITY_DN1690_c0_g1_len=258	(A)13	CCACCCGTTATTATTGAATCC	58.188	AATGCTTCGTTTGGAACCAG	60.11
TRINITY_DN16900_c0_g1_i1_gene=TRINITY_DN16900_c0_g1_len=781	(CAC)5	TCCATACAGCCATCAACAGC	59.679	AGGGTTAGTCACCAAACACCA	59.362
TRINITY_DN16918_c0_g2_i1_gene=TRINITY_DN16918_c0_g2_len=595	(TGT)5	TGGTGGTTGTGCTAGAGCTG	60.049	CAGGAAGATGGATGGGTTGT	59.779
TRINITY_DN16924_c1_g4_i1_gene=TRINITY_DN16924_c1_g4_len=351	(TC)6	CTCCCACTGCAGGAGGATTA	60.21	GGGACAAGAAATTTGTGGGA	59.767
TRINITY_DN16970_c0_g1_i1_gene=TRINITY_DN16970_c0_g1_len=830	(A)11	GGACGATCAAGCTTACGAGG	59.836	TGCCCGGAAGTTGTAAAGAG	60.241
TRINITY_DN16988_c0_g1_i1_gene=TRINITY_DN16988_c0_g1_len=1628	(GTT)7	CGGTGAAAGTATGCGTGATG	60.134	CTTCAATCATGTCGGTGGTG	59.96
TRINITY_DN16994_c0_g2_i1_gene=TRINITY_DN16994_c0_g2_len=1997	(TA)8	AAGGAACCATGTTGTGGTGG	60.668	GGAAAGCCTATATTTCCCATCC	60.012
TRINITY_DN17007_c0_g1_i1_gene=TRINITY_DN17007_c0_g1_len=1123	(A)12	ATGTGCATTTGGAGGGAAAG	59.933	CCTGAGCAAGGAGAACCAAC	59.844
TRINITY_DN17017_c0_g1_i1_gene=TRINITY_DN17017_c0_g1_len=2181	(A)14	CCAATCTCAATTCAACAAGAAAT	57.314	GGGACCTCAACTTCAAGCAA	60.232
TRINITY_DN17029_c0_g1_i2_gene=TRINITY_DN17029_c0_g1_len=485	(CCA)6	GCAGCATGAAGACCACTGAA	59.992	CTAAAGGTGGAGGCGCTAAA	59.492
TRINITY_DN17035_c0_g3_i1_gene=TRINITY_DN17035_c0_g3_len=315	(A)12	TAAACTCCAGCTCCCACCAG	60.246	TGGAGTCTTGTTCTCTTGGTGA	59.884
TRINITY_DN1709_c0_g1_i1_gene=TRINITY_DN1709_c0_g1_len=395	(A)10	GGCGGCCTAGGACACTAGA	60.368	GGCATCATCCTCTCACCCTA	60.034
TRINITY_DN1710_c0_g1_i1_gene=TRINITY_DN1710_c0_g1_len=347	(A)10	GGCCATGTTCATTTCAGTACC	59.307	TGCTGGATAATGGCAGTGAG	59.823
TRINITY_DN17110_c0_g1_i1_gene=TRINITY_DN17110_c0_g1_len=789	(A)10	CATCTACCCGAAAGAACCGA	60.066	GTGGCAGGTGGAGGTGTAAT	59.851
TRINITY_DN17116_c0_g1_i3_gene=TRINITY_DN17116_c0_g1_len=451	(T)14	ATCATTCTCCAGCGAGCACT	59.981	TCTCAAACTCATTTCTTCTTTCAGG	60.267
TRINITY_DN17152_c0_g1_i1_gene=TRINITY_DN17152_c0_g1_len=982	(A)13	CTGTCCTTCCTGCTTTCTGG	59.982	ATGAATCAGCGGTTTTCGAC	60.081
TRINITY_DN17157_c0_g1_i1_gene=TRINITY_DN17157_c0_g1_len=1474	(A)11	GCATGTTACAACACACCATGAA	59.371	GGAGATGAATCTGCTTCTGGA	59.376
TRINITY_DN17174_c0_g1_i2_gene=TRINITY_DN17174_c0_g1_len=427	(A)11	GAGATCTTGTCCTGAATTCCAA	58.24	CGAGAGTTTGATTTTGGTTAGACA	59.703
TRINITY_DN17201_c0_g1_i1_gene=TRINITY_DN17201_c0_g1_len=467	(GTT)5	ATTCACGGTTTGGTGGTGTT	60.134	ATCATTCAACACCTTTCCGC	59.939
TRINITY_DN17201_c0_g3_i1_gene=TRINITY_DN17201_c0_g3_len=653	(AAC)5	GGAGGCGGATCAAATTGTAA	59.901	GGATGGAGGACGAGTTGAGA	60.199
TRINITY_DN17209_c0_g1_i2_gene=TRINITY_DN17209_c0_g1_len=842	(TC)7	GAACTAAGCCAGCGAAAACG	60.018	GCTAGGGCTGGTTTGATTTG	59.708
TRINITY_DN17221_c0_g1_i1_gene=TRINITY_DN17221_c0_g1_len=882	(T)10	CCACAACCATACATGCATCA	58.782	CGAAACCGTCATGGGATTAC	60.192
TRINITY_DN17222_c0_g1_i1_gene=TRINITY_DN17222_c0_g1_len=388	(A)10	CAAAATAAGCCATCATAGAATCAGAA	59.904	TTGTTCCCTTCCTCTTTGTCA	59.697
TRINITY_DN17222_c0_g2_i1_gene=TRINITY_DN17222_c0_g2_len=441	(T)10	TCTCTGAGGGCTAAGTTGATCC	59.848	TTTGACCACCAAAACAAAACA	58.95
TRINITY_DN17258_c0_g2_i2_gene=TRINITY_DN17258_c0_g2_len=2326	(CAT)5	CCCAACATCAACCACTCTCC	60.363	AATCGCTATGAGGAGGCAGA	59.939
TRINITY_DN17266_c1_g1_i2_gene=TRINITY_DN17266_c1_g1_len=954	(T)12	AATTAATTGGAGCAAAGAGAGGT	57.591	CAAATTCATGCATCCACCAC	59.781
TRINITY_DN17306_c0_g1_i2_gene=TRINITY_DN17306_c0_g1_len=627	(TAG)5	AACTTGGTGTTGGTGCAGGT	60.466	TTTTTCCTATTTCAAACCCTTCTG	59.888
TRINITY_DN17316_c0_g1_i2_gene=TRINITY_DN17316_c0_g1_len=468	(T)11	ATCGAGGTCGGGCTTATCTT	60.06	TGATAGATGTAAACATGGATGGA	57.002
TRINITY_DN17319_c0_g1_i1_gene=TRINITY_DN17319_c0_g1_len=735	(TA)6	ATAGCTTTTCGCCGCCTATT	60.207	TCTTTTGGAGCAAAACAAGAAA	59.03
TRINITY_DN17320_c0_g1_i5_gene=TRINITY_DN17320_c0_g1_len=520	(A)10	AAGGGGACGAAGACATTGTG	59.966	TCCTCTCTGATTCGCGTTTT	59.955
TRINITY_DN17320_c0_g1_i5_gene=TRINITY_DN17320_c0_g1_len=520	(T)10	TACCGTCCTCAAACCCTCAC	59.966	CCGCAAACCCTCCTTCTAA	60.191
TRINITY_DN17347_c0_g1_i1_gene=TRINITY_DN17347_c0_g1_len=900	(CAAAA)5	ATCTTGATCCATCGGCTCTG	60.181	GTTGCCGGAAACAAAGAGAG	59.853
TRINITY_DN17366_c0_g1_i1_gene=TRINITY_DN17366_c0_g1_len=2190	(A)11	ACTCAGCGAAGGGTTTACGA	59.875	CCATCACCACCAATTCATCA	60.177
TRINITY_DN17369_c0_g1_i1_gene=TRINITY_DN17369_c0_g1_len=1021	(TCA)5	CATCAATTTTCCCTCCCTCA	59.864	CAATGAAGTGGTGGCATCTG	60.112
TRINITY_DN17386_c0_g1_i1_gene=TRINITY_DN17386_c0_g1_len=1604	(T)10	GGTCGCATGTTAGGGTTCTT	59.056	CGCGTTCTCTTTAGCATTTTT	58.71
TRINITY_DN17410_c0_g1_i1_gene=TRINITY_DN17410_c0_g1_len=328	(GA)7	GTGGAGAGCTGTTCGTGTGA	60.03	GGGGGTAGGCATAGCATATCA	61.035
TRINITY_DN17504_c0_g1_i1_gene=TRINITY_DN17504_c0_g1_len=942	(AC)6	AAAGAACAACATGGCCAACA	59.024	TGGTTCTTTTTGTCAGCGTG	59.881
TRINITY_DN17505_c0_g1_i2_gene=TRINITY_DN17505_c0_g1_len=622	(T)11	CAGCACCACCATTAGAAGCA	59.864	TTCCAAACGCATCCTTATCC	59.901
TRINITY_DN17519_c0_g3_i1_gene=TRINITY_DN17519_c0_g3_len=507	(A)11	GCTGACATGAATCCAAACCA	59.502	TCGTCTTCGGTATGCAACAA	60.257
TRINITY_DN17521_c0_g1_i2_gene=TRINITY_DN17521_c0_g1_len=978	(AT)6	CCCCCTCAAGTTGGAGTACA	59.959	CATGGTAAATTCCAGGACGG	60.184
TRINITY_DN17533_c0_g1_i2_gene=TRINITY_DN17533_c0_g1_len=1371	(A)10	ACAGCCACCAAACAAAATCA	59.024	GTTGGTTGAGCAGCTTGGTT	60.299
TRINITY_DN17566_c0_g1_i1_gene=TRINITY_DN17566_c0_g1_len=423	(A)10	CCGGTGGGTAAAGAATCAAA	59.795	CCCCTCTTTCTCTTTCACGA	59.401
TRINITY_DN1757_c0_g1_i1_gene=TRINITY_DN1757_c0_g1_len=245	(GAA)5	TCTTTGACGGCATTTTCGAC	61.149	CACACACATCTCAAAAATCCAAA	59.89
TRINITY_DN17614_c0_g1_i2_gene=TRINITY_DN17614_c0_g1_len=1273	(A)11	TCTTTCCTGTCATGCAACCA	60.24	TGGTGAAAATCGAATGACCA	59.9
TRINITY_DN17634_c0_g1_i1_gene=TRINITY_DN17634_c0_g1_len=1246	(A)10	CCTAAGCTTGTCTAATAGCCCG	59.453	ATGTGGGAGAGGAACTTTGC	59.141
TRINITY_DN17636_c0_g2_i1_gene=TRINITY_DN17636_c0_g2_len=481	(TGT)6	GGTTGCATGAGACAACCTGA	59.682	TGCAACTAAACAAACAGGGTCA	60.566
TRINITY_DN17668_c0_g1_i1_gene=TRINITY_DN17668_c0_g1_len=616	(T)12	GTGAACCCAACAATCCCATC	60.034	ATGCCGAGGAAAGTCACAGT	59.727
TRINITY_DN17714_c0_g2_i1_gene=TRINITY_DN17714_c0_g2_len=390	(T)11	CCGTGAGAATTTGAGAGGACA	60.239	CATCACCACCCTGCTTCTTT	60.111
TRINITY_DN17764_c0_g1_i2_gene=TRINITY_DN17764_c0_g1_len=534	(AG)8	CCTCCAAGCTCCAAGTATGG	59.688	CCCGAGGAAATGAGATGAAA	60.006
TRINITY_DN17776_c0_g1_i2_gene=TRINITY_DN17776_c0_g1_len=1772	(T)11	AAAAACTGCATCTCCACAACC	59.091	TTACATGTCCTCAGCCACCA	60.112
TRINITY_DN17776_c0_g1_i2_gene=TRINITY_DN17776_c0_g1_len=1772	(GTG)5	TGCCTGCTGGTCTTCTTTTT	59.993	CCACGAATAAAGCTGAATTTCC	59.97
TRINITY_DN17790_c0_g1_i1_gene=TRINITY_DN17790_c0_g1_len=3280	(GA)8	AGATGTTTGTTGCAGGGTCC	59.973	CGATCAAATCTAATAATATCTCACCTC	57.923
TRINITY_DN17790_c0_g1_i1_gene=TRINITY_DN17790_c0_g1_len=3280	(T)11	CCCATCCTTCTTTCTGACCA	60.042	CACAGTAGCCCCTGCTCTTC	60.012
TRINITY_DN17826_c0_g1_i2_gene=TRINITY_DN17826_c0_g1_len=2308	(A)10	TCTGCGGTTGTCCAACATAA	60.111	TGAATCTGCTGCTTCATTGC	60.104
TRINITY_DN17855_c0_g1_i1_gene=TRINITY_DN17855_c0_g1_len=1006	(TTG)7	GCTGAAGACGTGAGGGAGAC	59.993	CGCAGAGAGGGGTAACAGAG	60.005
TRINITY_DN17864_c0_g1_i2_gene=TRINITY_DN17864_c0_g1_len=818	(A)14	TGCTAAGCATTTCCTTGCCT	59.982	TGATGTCCCTTCAAAAGGTTG	59.956
TRINITY_DN17873_c0_g2_i1_gene=TRINITY_DN17873_c0_g2_len=475	(A)10	AGAAACAAAGGCAGATTGCG	60.386	CATGGTATCAGAGCGTGAACA	59.731
TRINITY_DN17944_c0_g1_i3_gene=TRINITY_DN17944_c0_g1_len=353	(A)10	TATTGTTCACGCTCCATCCA	60.073	TGTTTGGTGATTAATTGTGTCCA	60.138
TRINITY_DN17966_c0_g2_i1_gene=TRINITY_DN17966_c0_g2_len=417	(A)10	CCACGTATTAATTCCAAATTCCA	59.961	GAGGGGCAACAGAGGAAGAT	60.596
TRINITY_DN17981_c0_g1_i1_gene=TRINITY_DN17981_c0_g1_len=945	(TGG)5	ATCAGGTGGCTTTTGCATTC	60.081	TCACTGCACGTCAGGAAGAG	60.178
TRINITY_DN17985_c0_g1_i1_gene=TRINITY_DN17985_c0_g1_len=1242	(TGA)5	AAAAGAGTCGTGGGTTGTGG	60.005	CAAACACTTTCATTTTCTCTTCCA	59.682
TRINITY_DN18006_c0_g1_i2_gene=TRINITY_DN18006_c0_g1_len=1278	(A)11	CAAAATTTACGAACCGAGAAAAA	59.56	CGTGCAATTTCCAAGCACTA	59.872
TRINITY_DN18014_c0_g4_i1_gene=TRINITY_DN18014_c0_g4_len=1059	(A)12	TCCTTTATCTTCCTTCCCTCA	57.863	GGAGTGATAGATCTCGGCCA	60.181
TRINITY_DN18015_c0_g1_i1_gene=TRINITY_DN18015_c0_g1_len=936	(AAG)5	GCTTGAGAAGGTTTGCCTTG	59.993	GAAAGAGACCAGAAGAATGTGC	58.055
TRINITY_DN18034_c0_g1_i2_gene=TRINITY_DN18034_c0_g1_len=2805	(ACA)5	GGACAACAAAAACAACAACAACA	59.836	TTTCCATTCATCCATCACCC	60.526
TRINITY_DN18086_c0_g1_i1_gene=TRINITY_DN18086_c0_g1_len=806	(T)11	CAGGACACGCTGACATGAAG	60.463	TAGGCAGTTTGTTATGGGGG	59.817
TRINITY_DN1812_c0_g1_i1_gene=TRINITY_DN1812_c0_g1_len=1017	(AG)6	GGCAAAAAGGTTTGGATGAA	59.916	GGGAGAGAGGTGTCGTTGTC	59.688
TRINITY_DN18124_c0_g1_i2_gene=TRINITY_DN18124_c0_g1_len=657	(A)12	TCATGGCATCACTATCACCAA	59.94	GAGCTTGTTCTGTGCTGTGG	59.622
TRINITY_DN18135_c0_g1_i7_gene=TRINITY_DN18135_c0_g1_len=1762	(TCA)6	TCATTTGCCTTTGCATCAAC	59.67	ATGCAATTGTGCTTGTTGGA	60.119
TRINITY_DN18136_c0_g1_i2_gene=TRINITY_DN18136_c0_g1_len=544	(A)10	CAGTCAATTTTGCAGCCTCA	59.988	CCCTACTGCGGTTTGATGTT	59.993
TRINITY_DN18141_c0_g1_i1_gene=TRINITY_DN18141_c0_g1_len=284	(T)14	GCAAAACCTCCATTGCATCT	60.081	TGCAACTAAATCTAAGCAAAGGAA	59.492
TRINITY_DN18179_c0_g1_i3_gene=TRINITY_DN18179_c0_g1_len=673	(CA)6	TGTCACACAGTAAACACACAAACA	59.119	ATTCCTGGTCACTGCCAATC	59.934
TRINITY_DN18234_c0_g1_i1_gene=TRINITY_DN18234_c0_g1_len=632	(A)10	TGAGTTCGAATCCAAAACACAC	60.015	AGCATCGTCTTCCTCATGCT	59.981
TRINITY_DN18240_c0_g1_i2_gene=TRINITY_DN18240_c0_g1_len=2559	(A)12	ATCATCATCGTGGAAGGAGC	60.042	GACGTGTTCCTTAGGCAGGA	60.255
TRINITY_DN18265_c0_g1_i2_gene=TRINITY_DN18265_c0_g1_len=1962	(GAT)5	CCGAGAAAAATTGACACTCACA	60.147	CGTTCCAAATCCAAAACCAA	60.702
TRINITY_DN18267_c0_g3_i1_gene=TRINITY_DN18267_c0_g3_len=382	(T)11	GCCATGGCCACATTATACAG	58.872	TGCAGAAATCAAAAGCTTGAA	58.688
TRINITY_DN18272_c0_g1_i5_gene=TRINITY_DN18272_c0_g1_len=1285	(TCA)7	CCCCAAACTCCATCTCAGAA	60.042	TGATTGGAGTCGCTCTTGTG	59.984
TRINITY_DN18303_c0_g1_i4_gene=TRINITY_DN18303_c0_g1_len=1852	(T)10	CCCAACACGGCATAGACAAT	60.776	CACTGTCGGTTCTTTCGGTT	60.149
TRINITY_DN18311_c0_g1_i1_gene=TRINITY_DN18311_c0_g1_len=1028	(GGA)6	GGGAGGTGGCGATAGTCATA	59.917	ACATGGAACCCTCCTCACAC	59.817
TRINITY_DN18312_c1_g2_i1_gene=TRINITY_DN18312_c1_g2_len=312	(T)10	AGACAAAAATCAGCATCGCC	60.221	GCCATTGTTTTGTTTGTTTTGA	59.89
TRINITY_DN1832_c0_g1_i1_gene=TRINITY_DN1832_c0_g1_len=317	(A)11	GTGTTTTAGATCGCGCACAA	59.879	GTAGCTTCAAAAAGGGCCAA	59.338
TRINITY_DN18332_c0_g1_i1_gene=TRINITY_DN18332_c0_g1_len=754	(T)12	GAGAAAACGGTTTGACCCAA	59.948	TCCATCATCCACTTTCCCAT	60.135
TRINITY_DN18348_c0_g1_i3_gene=TRINITY_DN18348_c0_g1_len=1151	(A)10	GCAGTTCCAATCTCCTGGTC	59.661	CATTCTTCCCACCATCAACC	60.173
TRINITY_DN1835_c0_g1_i1_gene=TRINITY_DN1835_c0_g1_len=359	(GA)7	TACCTGGGCTTGGCTTTATG	60.089	TTCTGTTAATGTTAGAATATGGACCC	58.851
TRINITY_DN18352_c0_g2_i1_gene=TRINITY_DN18352_c0_g2_len=1757	(A)12	TGACCTCTCCAAGTGGTTAATTC	59.513	AGATAGAGGAACAAAGCATGAAA	57.228
TRINITY_DN18364_c0_g2_i1_gene=TRINITY_DN18364_c0_g2_len=601	(AGA)5	CCTCCTCCGTTTTGCAAGTA	60.241	TCTCATGGATTCTTCTCTTCCTC	58.933
TRINITY_DN18371_c0_g1_i1_gene=TRINITY_DN18371_c0_g1_len=529	(A)10	GATGACACATCCATTGAAAATCA	59.682	TGTCATTTCTTACCAATGATTCTTTT	59.385
TRINITY_DN18381_c0_g1_i2_gene=TRINITY_DN18381_c0_g1_len=1718	(A)13	CAAAACATCACAAAACACCCA	59.327	CAAATGCAGCTCCTTAAGCC	59.982
TRINITY_DN18394_c0_g1_i3_gene=TRINITY_DN18394_c0_g1_len=1108	(GA)7	ACAAAACCAGCGAAATCTGG	60.11	AAAGAAATGGTGCTCGGTTG	60.11
TRINITY_DN18416_c0_g2_i1_gene=TRINITY_DN18416_c0_g2_len=1552	(A)10	TGGAGCTTTTTGGAATGACC	60.051	TCCATGATGCAAGCGACTTA	60.366
TRINITY_DN18420_c0_g2_i1_gene=TRINITY_DN18420_c0_g2_len=760	(CA)7	CATTGCGGCTCACATAAAAA	59.702	CATTGCCATCCACAACCATA	60.197
TRINITY_DN18426_c0_g1_i1_gene=TRINITY_DN18426_c0_g1_len=855	(T)11	CCCCTTAAGGTATGAACGCA	59.953	TTATTGTCGAGAAGGGACCG	60.066
TRINITY_DN18437_c0_g1_i1_gene=TRINITY_DN18437_c0_g1_len=1171	(T)12	ATTACGCCGCAGTTGTTGAT	60.531	ACGCTTTCTCTACTTGGCCT	58.227
TRINITY_DN18441_c0_g1_i1_gene=TRINITY_DN18441_c0_g1_len=1788	(TA)7	CAGTGTTGGTGAACGGATTG	60.001	ATCCATCATCGTCGTCATCA	59.882
TRINITY_DN18457_c0_g1_i1_gene=TRINITY_DN18457_c0_g1_len=952	(T)10	TGGCAATGGAAAGTGAAAGA	59.247	TCCAAGGGTGGAAGTTTTTCT	59.963
TRINITY_DN18462_c0_g1_i2_gene=TRINITY_DN18462_c0_g1_len=1550	(GA)6	GGGGGAAAAAGAAGAAATGG	59.75	CCAAAAATGGATACTTTGCCA	59.818
TRINITY_DN18472_c0_g1_i1_gene=TRINITY_DN18472_c0_g1_len=808	(A)10	CAAGGCCCAAAATTTTTCAA	59.916	CTTGACAGCCCAACGAAAAT	60.11
TRINITY_DN18482_c1_g1_i1_gene=TRINITY_DN18482_c1_g1_len=636	(A)10	AAGCATACCAGCAATGAATGTG	60.025	GACGGTTGAAGATTGACGGT	59.973
TRINITY_DN18492_c0_g2_i1_gene=TRINITY_DN18492_c0_g2_len=232	(A)12	CCTGCAAACCAATCGAGTTA	58.771	CTGCGCTTCCCTTAATTCTG	59.975
TRINITY_DN18520_c0_g2_i1_gene=TRINITY_DN18520_c0_g2_len=1225	(A)11	CAACCATCAAGCCTTATCCC	59.387	CGTGGCTGAATCCCATATCT	59.917
TRINITY_DN18524_c0_g1_i6_gene=TRINITY_DN18524_c0_g1_len=2912	(T)10	TCCAATCAGGCCTAGGAAAA	59.64	CCAAACATGGTCAATTGCAG	59.964
TRINITY_DN18527_c0_g1_i1_gene=TRINITY_DN18527_c0_g1_len=1038	(A)10	AGGACAGTCAACCACATTGAG	57.625	CCCAACTCACGCGATTGTAT	60.914
TRINITY_DN18527_c0_g1_i1_gene=TRINITY_DN18527_c0_g1_len=1038	(GA)6	CCAAGATGATACAAATGGTTGG	59.202	GCCACTGCTTTTCCAATGTA	58.773
TRINITY_DN18535_c0_g1_i1_gene=TRINITY_DN18535_c0_g1_len=1224	(ATG)6	ATTTTCCTGTGGCTGTTGCT	59.74	TCTCATCTCCAAAGGCACAA	59.369
TRINITY_DN18535_c0_g1_i1_gene=TRINITY_DN18535_c0_g1_len=1224	(GAA)5	GCAGCAGCCATAAGATCACTC	59.999	CCTGTTTTTAGGAAGCGTGG	59.741
TRINITY_DN18585_c0_g1_i1_gene=TRINITY_DN18585_c0_g1_len=605	(T)10	CACTGATCTTGCTTGTTGCC	59.445	AGACCACCCACCTGCATAAC	59.851
TRINITY_DN18596_c0_g1_i1_gene=TRINITY_DN18596_c0_g1_len=527	(A)10	GCAGCTTTTTCGAGACTTGG	60.132	TCAGATTGATCAACTCACTCAACTT	59.336
TRINITY_DN18605_c0_g2_i1_gene=TRINITY_DN18605_c0_g2_len=1195	(AC)8	TCTTTGTTCAAATATGCTGTGC	57.98	CGAATTTGATGTTTCCCTTGA	59.924
TRINITY_DN18606_c0_g1_i1_gene=TRINITY_DN18606_c0_g1_len=318	(A)10	GCTCTTTTCAATACACCCCC	58.504	TCTCCTACAGGCCCACTCTG	60.399
TRINITY_DN18613_c0_g1_i2_gene=TRINITY_DN18613_c0_g1_len=1309	(GCTC)6	GGCTTGCTTACGAATCTTGG	59.845	CCCTTGAAACTTTGTCTCCG	59.705
TRINITY_DN18641_c0_g1_i1_gene=TRINITY_DN18641_c0_g1_len=1537	(A)10	CCCTATGTTGCAAATTGCCT	59.96	AAGAGGACAAAACGGTGACG	60.149
TRINITY_DN18647_c0_g2_i1_gene=TRINITY_DN18647_c0_g2_len=457	(T)10	CATCTCCGTAATGACCCTCG	60.474	CCCTTTTCTCAGAACCACCA	60.081
TRINITY_DN18649_c0_g1_i2_gene=TRINITY_DN18649_c0_g1_len=745	(T)10	TCTTTTGCTGGTCCAACTGA	59.415	AAAGCCATGAAGACAGTATCTGG	59.666
TRINITY_DN18650_c0_g1_i1_gene=TRINITY_DN18650_c0_g1_len=1346	(A)10	TGCCAAATTTGATGGAGTTG	59.518	TTGCCATCTTTTCCACCACT	60.495
TRINITY_DN18663_c0_g1_i1_gene=TRINITY_DN18663_c0_g1_len=991	(GTG)5	GTGATCTGAAAATGGTGGCA	59.502	CGTGTGGTATCTAGGGTTTCG	59.503
TRINITY_DN18673_c0_g1_i5_gene=TRINITY_DN18673_c0_g1_len=1406	(A)10	TGAAGATATCAACCGATCAACTTA	57.848	ACCCAAATTGCTGCAAAAAC	59.982
TRINITY_DN18676_c0_g2_i2_gene=TRINITY_DN18676_c0_g2_len=1327	(T)10	GAGGTGGTTGGTTTCTTCCA	59.943	CTCTTCTCCACCACCTTACCA	59.193
TRINITY_DN18679_c0_g1_i2_gene=TRINITY_DN18679_c0_g1_len=1251	(AGC)5	CGAGTCATTGTTTCAGCCAA	59.84	GCTGTTCCTACAAAAACACCG	59.663
TRINITY_DN18691_c0_g1_i1_gene=TRINITY_DN18691_c0_g1_len=306	(T)10	TACTTATCACCGGCAATCCC	59.784	GCAATATCCCACTTGCTCGT	60.103
TRINITY_DN18725_c0_g1_i1_gene=TRINITY_DN18725_c0_g1_len=798	(A)13	TCGATAGTTGCACAAAAGCG	60.014	CAGGTGGTGGAGGTGAAAGT	60.002
TRINITY_DN18729_c0_g1_i1_gene=TRINITY_DN18729_c0_g1_len=782	(A)11	GCTCCTCTTTTATTAAACAAACAAAAA	59.591	CACGACGAAGAATGGAGAGAG	59.997
TRINITY_DN18739_c3_g1_i1_gene=TRINITY_DN18739_c3_g1_len=971	(TC)6	CATTCTGTTGGATTCTTTGCC	59.56	ATTTTCCATTCGTTGATCGC	59.907
TRINITY_DN18754_c0_g1_i1_gene=TRINITY_DN18754_c0_g1_len=1464	(AAC)7	AAAAGCCCGAAGGGAATAGA	60.034	CATGGTGAAATTTGTTTCGCT	59.989
TRINITY_DN18754_c0_g1_i1_gene=TRINITY_DN18754_c0_g1_len=1464	(A)11	TCGGTACTTTCCTGCCAATAA	59.595	TCTATTCCCTTCGGGCTTTT	60.034
TRINITY_DN18769_c0_g1_i2_gene=TRINITY_DN18769_c0_g1_len=1745	(A)11	CCGACGTCAAAGAAGGGTAA	60.103	TTCAAGACATGGAGGCTGGT	60.656
TRINITY_DN18777_c0_g1_i1_gene=TRINITY_DN18777_c0_g1_len=775	(TTG)6	CAAAGCGGAGAAGTTTCTGG	59.986	GAAGAAAAGCAACGATGGGA	60.192
TRINITY_DN18777_c1_g1_i1_gene=TRINITY_DN18777_c1_g1_len=1209	(A)11	CGATCTCGACCGTTCAATTT	60.074	CCTTCCCAAAGAAAACTCCC	59.912
TRINITY_DN18789_c0_g2_i1_gene=TRINITY_DN18789_c0_g2_len=214	(A)11	TCACCCAAATCAAAAGCAAA	59.133	TGATCCGTGTGATTTGTTGG	60.367
TRINITY_DN18793_c0_g1_i1_gene=TRINITY_DN18793_c0_g1_len=1033	(A)10	AACCATGAATCACATGCAACA	59.838	ACTTTGGCCCACACTCTTTG	60.149
TRINITY_DN18834_c0_g2_i1_gene=TRINITY_DN18834_c0_g2_len=723	(AAC)5	CAAAACAGAAACCACATACCCA	59.763	TGGCGCTAAAGTCATCCTCT	59.978
TRINITY_DN18864_c0_g2_i2_gene=TRINITY_DN18864_c0_g2_len=770	(GA)6	CACGCCGAGATTGTATTCCT	60.096	GGCGGTAACGACAAGTGTG	60.167
TRINITY_DN18872_c0_g1_i3_gene=TRINITY_DN18872_c0_g1_len=1820	(A)10	AGATGTCGGTAAATGCCTGG	59.955	GCAAAAGTGACGAAGCATGA	59.995
TRINITY_DN18872_c0_g1_i3_gene=TRINITY_DN18872_c0_g1_len=1820	(A)10	CCGCTTGCGATTCAATTC	60.307	TTGTTCTGGGGTTTTTCTCG	60.081
TRINITY_DN18872_c0_g1_i3_gene=TRINITY_DN18872_c0_g1_len=1820	(A)10	GGACACAAGAAAAGTCGTTGG	59.624	CTGATGTATGTCTGCTGCGA	58.544
TRINITY_DN18877_c1_g2_i1_gene=TRINITY_DN18877_c1_g2_len=824	(AGT)5	AAGCTTCCAAGCAATGGAGA	59.955	CAAGATTGTGAACCAAGAGGG	59.578
TRINITY_DN18883_c0_g1_i5_gene=TRINITY_DN18883_c0_g1_len=3488	(CCA)5	CCCCTCCTCCTCCTCTATTG	60.023	TGCTAATGAGAGGGGTTTGG	60.066
TRINITY_DN18883_c0_g1_i5_gene=TRINITY_DN18883_c0_g1_len=3488	(T)10	GGCAATCTCAATTTCCATGAG	59.519	TGCAACATTTCCCAAAGAGA	59.247
TRINITY_DN18883_c0_g1_i5_gene=TRINITY_DN18883_c0_g1_len=3488	(TC)7	TCTGAACACGAGATCGAACG	59.984	GTAGCAGCGACGAAAACACA	60.058
TRINITY_DN18923_c0_g1_i1_gene=TRINITY_DN18923_c0_g1_len=903	(AT)6	CAGCAGAAAATCACCTGCTTC	60.008	CTTCCTGCTTGCCACCTTAG	60.008
TRINITY_DN18938_c0_g1_i1_gene=TRINITY_DN18938_c0_g1_len=1123	(A)11	CAAACTTCACCACCTCATTCC	59.439	TTTTGAGGGTGATGAAAGCC	60.051
TRINITY_DN18957_c0_g1_i4_gene=TRINITY_DN18957_c0_g1_len=1663	(TTC)5	GCATAAGCATCTGCAAGCAA	60.126	TTCGTCCGTCGGTAAAAGTC	60.11
TRINITY_DN18969_c0_g1_i4_gene=TRINITY_DN18969_c0_g1_len=849	(GCG)5	GCAGAAACGACGGTAGTGGT	60.179	TTCCAACAATGCAGGTTCAA	60.088
TRINITY_DN18982_c0_g2_i1_gene=TRINITY_DN18982_c0_g2_len=946	(T)12	CATGCATTCATTGACTTGGA	58.039	GAAGAGGTTTTCTCCTTCAACC	58.376
TRINITY_DN18992_c0_g1_i3_gene=TRINITY_DN18992_c0_g1_len=1082	(A)11	ATGGCAAAAACCTCGTCAAT	59.434	CTGCAGAGTGGTGCAGAGAG	59.915
TRINITY_DN19012_c0_g1_i4_gene=TRINITY_DN19012_c0_g1_len=1656	(TA)6	AATGTCCATGGGAAAGTTGC	59.797	CTCAGTGTCCCCACTCACAA	59.705
TRINITY_DN19013_c0_g1_i2_gene=TRINITY_DN19013_c0_g1_len=2088	(A)10	TCATCAGTCTTCCTGCTCGAT	59.965	GGTGAGATTTTAATGCTTTCTTGG	60.344
TRINITY_DN19022_c0_g1_i3_gene=TRINITY_DN19022_c0_g1_len=2003	(T)10	CACCCAAAGAACCTAAGCCA	60.103	CTCCTCCCAAGGTGCACTAC	59.721
TRINITY_DN19045_c0_g1_i1_gene=TRINITY_DN19045_c0_g1_len=1796	(AAC)5	CGCATTTCCAGCAATACAAT	58.653	TGAACTTTGATGTTGATCCGTT	59.476
TRINITY_DN19051_c0_g1_i1_gene=TRINITY_DN19051_c0_g1_len=678	(GGT)5	CGGAATGGATATTTGTTGGG	60.009	GCCTCCTTTTCTCATCCCAT	60.41
TRINITY_DN19063_c0_g2_i2_gene=TRINITY_DN19063_c0_g2_len=956	(T)12	CCTGCAAACCTTCAAACAAAA	60.131	GGAGAAGTGGCTTCCTCCAT	60.596
TRINITY_DN19064_c0_g2_i1_gene=TRINITY_DN19064_c0_g2_len=991	(T)10	CCGAGTGAAGCTAGGTGGAG	60.005	TCCAATCTAAGTGCCTTTTGG	59.211
TRINITY_DN19084_c0_g1_i1_gene=TRINITY_DN19084_c0_g1_len=621	(TA)8	GTACCTTGATCGTCACGCCT	60.142	GACAATCCTCTTCATTGGATCA	58.984
TRINITY_DN19101_c0_g3_i1_gene=TRINITY_DN19101_c0_g3_len=307	(CAG)5	CATGAAAGGCAAGGCTGAAT	60.214	TGGTGTCTCTTTCTCTCCTTCA	59.062
TRINITY_DN19136_c0_g1_i1_gene=TRINITY_DN19136_c0_g1_len=964	(GTT)5	ATCAACGAAACTCTCCACGG	60.111	CTGGGTTTTCCGTCCAATTA	59.795
TRINITY_DN19145_c0_g1_i2_gene=TRINITY_DN19145_c0_g1_len=1768	(TA)11	CCTTTTTGGATCTTTGTTTTGG	59.852	AAAATTGCCGAAAGTGACCA	60.481
TRINITY_DN19147_c1_g2_i1_gene=TRINITY_DN19147_c1_g2_len=719	(A)10	CACCTGCAACCAATTTTCCT	59.971	TGGTACACGGTGGTTATGGA	59.691
TRINITY_DN19177_c0_g1_i1_gene=TRINITY_DN19177_c0_g1_len=1170	(A)10	CGACATTCTTGACTGCAAAAAG	59.92	TCTCATGGTGCAAATCCAAA	60.049
TRINITY_DN19181_c0_g1_i2_gene=TRINITY_DN19181_c0_g1_len=2111	(GA)6	AATAGCAAGATCGGCGAAAA	59.816	ACGTTAAACCCGATCCCAAT	60.431
TRINITY_DN19183_c0_g1_i2_gene=TRINITY_DN19183_c0_g1_len=1309	(A)10	GCAGCAACTTAATCACGGGT	60.14	TGTCATCTTTATAGCTGGGGG	59.054
TRINITY_DN19185_c1_g1_i1_gene=TRINITY_DN19185_c1_g1_len=925	(A)12	CCAAGCACTTTTTCAAAGCC	59.861	GCCTTCTTCTCAAATCACGG	59.813
TRINITY_DN19185_c1_g1_i1_gene=TRINITY_DN19185_c1_g1_len=925	(A)17	TCAGACAACCACAGGCAAAG	59.873	TCACCACCACTCAAGACACG	60.783
TRINITY_DN19186_c0_g1_i2_gene=TRINITY_DN19186_c0_g1_len=2540	(CCA)5	CCAAACTTCCAGCATCCATT	59.933	CCCTGCTTAAGAGTCATGGG	59.688
TRINITY_DN19207_c0_g1_i2_gene=TRINITY_DN19207_c0_g1_len=660	(T)10	ATTCGCCGCTTTGGTAACTT	60.976	AGCGGCAATTGAGGAAATAA	59.682
TRINITY_DN19208_c0_g1_i1_gene=TRINITY_DN19208_c0_g1_len=1958	(A)10	AGGAGTTTGGGAGGAAGGAA	60.045	TCCATCACCCTTTTAAATTTTCTC	59.743
TRINITY_DN19225_c0_g1_i1_gene=TRINITY_DN19225_c0_g1_len=894	(T)10	TGAAATAATGGTGGGTCATGG	60.433	TGGCTACAAATTAAGACCCTACG	59.585
TRINITY_DN19236_c0_g1_i1_gene=TRINITY_DN19236_c0_g1_len=1380	(ATC)6	ATGATGCGACAAAAAGGACC	59.939	AACCTGCAGGACCACTCAAC	60.159
TRINITY_DN19251_c0_g1_i2_gene=TRINITY_DN19251_c0_g1_len=2079	(A)10	TCATGGCTTTGAGGTTCACA	60.24	TGTTCCCATGTTCATCTTGC	59.502
TRINITY_DN19280_c0_g1_i1_gene=TRINITY_DN19280_c0_g1_len=1031	(ACC)5	AGGTGGCGGAGAGGAGTAGT	60.274	TTGCGGTTGGTGATTTAACA	59.969
TRINITY_DN19292_c0_g2_i2_gene=TRINITY_DN19292_c0_g2_len=1890	(A)10	CCTACCTAACCGTCCAACCA	59.846	TCCCATACAGAAAGAACCGC	60.074
TRINITY_DN19295_c0_g1_i4_gene=TRINITY_DN19295_c0_g1_len=2663	(GGA)5	TCGCTGTCGTCATTCTTGTC	59.992	CCAGTCAATATGCCTCCGAT	59.917
TRINITY_DN19305_c0_g2_i1_gene=TRINITY_DN19305_c0_g2_len=266	(A)11	AAGGATACGAAGTGCCGATG	60.096	CTGCTTTAGCTGTGCACTTTT	57.553
TRINITY_DN19315_c0_g1_i4_gene=TRINITY_DN19315_c0_g1_len=2444	(TCA)5	CAAATCCACAACAGCATTCG	60.111	TGGGGTTTCCTTGGAAGATT	60.663
TRINITY_DN19331_c0_g1_i1_gene=TRINITY_DN19331_c0_g1_len=781	(A)11	AAAGACGGTGATAGCATTCCA	59.583	GTTGTTTCGGCAAACACCTT	60.015
TRINITY_DN19345_c0_g1_i1_gene=TRINITY_DN19345_c0_g1_len=537	(A)14	AGCCATGTCAACAAAAACCC	59.836	CATCATAATGTGTGTGGAATGG	58.625
TRINITY_DN19345_c0_g1_i1_gene=TRINITY_DN19345_c0_g1_len=537	(A)11	CCAATCAACATTTTGGTGAGC	60.359	TTTTGTGTTTGCTTGTGTTTTTG	60.095
TRINITY_DN19356_c0_g1_i3_gene=TRINITY_DN19356_c0_g1_len=1483	(T)11	CATGTGTCATCTTCAACACACG	60.072	CGTGTTTTCGTGGCAAATAA	59.603
TRINITY_DN19357_c1_g1_i4_gene=TRINITY_DN19357_c1_g1_len=2153	(A)10	AGCATTGAAAAACCCTCCCT	59.94	TCAATATCACTGCCCACCAA	59.924
TRINITY_DN19357_c1_g2_i1_gene=TRINITY_DN19357_c1_g2_len=1284	(ATA)5	TCACTGCATCGCATTACACA	59.859	TGGGACCAGTTGTGAGCATA	60.112
TRINITY_DN19379_c0_g1_i2_gene=TRINITY_DN19379_c0_g1_len=802	(GAA)5	GACGATCATCAGGGAGGAAA	60.011	TTGATCGGCGAGATTTCAG	59.892
TRINITY_DN19403_c0_g1_i5_gene=TRINITY_DN19403_c0_g1_len=1589	(A)12	CATGGAAGCTAAGGCTGGTT	59.336	CCCCACAACGTTTCAATGAT	60.615
TRINITY_DN19407_c0_g2_i2_gene=TRINITY_DN19407_c0_g2_len=742	(A)10	TCACCAAAGGAACTTTTCCAA	59.573	TGTAAGTTTCTTCATCTTGTGTTCTT	57.753
TRINITY_DN19407_c0_g5_i1_gene=TRINITY_DN19407_c0_g5_len=412	(T)11	TAGCCAGCAGAGTCACATGG	60.008	TCCTAATTGTGTTCACCGACC	59.845
TRINITY_DN19414_c0_g1_i2_gene=TRINITY_DN19414_c0_g1_len=606	(A)10	TGCAGTGTTCAAGTGAGAGAAAA	60.081	GCTTCAACGATTGTTGGGTT	59.978
TRINITY_DN19421_c0_g2_i1_gene=TRINITY_DN19421_c0_g2_len=1612	(AT)6	AAATCCAACCCTAGCAAGCC	60.451	TGACATGGAAGGATGAACCA	59.893
TRINITY_DN19426_c0_g1_i3_gene=TRINITY_DN19426_c0_g1_len=3438	(A)11	CAATTAACAAAATGGGAAATGGA	59.941	CAATGAAATCTTGCATGAGCA	59.824
TRINITY_DN19445_c0_g2_i3_gene=TRINITY_DN19445_c0_g2_len=1243	(A)10	AGAGGGGGTTGGAGTTTGTT	59.834	TCAAGCGTTGTTTCTGTTAAAAA	59.01
TRINITY_DN1947_c0_g1_i1_gene=TRINITY_DN1947_c0_g1_len=619	(TTG)7	CTAACCTGCATTCCTCTCGC	59.978	GGAAGACAACAGCAACAGCA	60.032
TRINITY_DN19473_c0_g1_i1_gene=TRINITY_DN19473_c0_g1_len=1983	(A)10	TGACCTGACATCGTTACCCA	59.96	TCTCATGTTTGGTTGGAGCA	60.24
TRINITY_DN19474_c0_g1_i4_gene=TRINITY_DN19474_c0_g1_len=1866	(A)13	TGCAAATAACACAATCCATTCA	58.936	CTCCCAAGCAAGCTCTTCAG	60.269
TRINITY_DN19478_c0_g1_i1_gene=TRINITY_DN19478_c0_g1_len=1233	(A)10	GCAAACGAAGATAAACCACAAA	59.166	TTTGTGAAAGTGTGGGTGTGA	60.033
TRINITY_DN19478_c0_g1_i1_gene=TRINITY_DN19478_c0_g1_len=1233	(TGA)5	TGGCTGCATGGTTTCTTAAA	59.301	CACATAAACACATAAAACACAAACACA	60.052
TRINITY_DN19482_c0_g1_i2_gene=TRINITY_DN19482_c0_g1_len=1513	(T)12	ATCAACATCCCACCAACCAT	59.91	CGGTCGAGTCAAGATCCCTA	60.21
TRINITY_DN19491_c0_g1_i1_gene=TRINITY_DN19491_c0_g1_len=978	(A)10	TGAACGCATGTTCCATGATT	59.931	CTTGCCGGCACAATAGAAAT	60.096
TRINITY_DN19519_c0_g1_i2_gene=TRINITY_DN19519_c0_g1_len=299	(A)11	AGAGAGAGCGACGAGCTTGA	60.577	AGTGGTAAGGCTGGTGATGG	59.989
TRINITY_DN19520_c0_g1_i7_gene=TRINITY_DN19520_c0_g1_len=1787	(CCA)7	ATCCCCAAATGATCCAAACA	59.991	GGGAAGATGGTTTGAAGGGT	60.169
TRINITY_DN19538_c0_g1_i3_gene=TRINITY_DN19538_c0_g1_len=1012	(T)11	AGACGATGAGGACACCAACC	59.969	CTAAGCATTCGTGCAATGGA	59.833
TRINITY_DN19551_c0_g1_i2_gene=TRINITY_DN19551_c0_g1_len=1237	(A)10	GATGCCAATCGAAAAAGATTAAA	59.493	TGGAATGTAAGGCAAAGAGTCA	59.747
TRINITY_DN19558_c0_g2_i1_gene=TRINITY_DN19558_c0_g2_len=439	(GA)6	TATGCTAGGCTGTCCCAACC	60.096	AGAAAAGAATCCATCAAAACTTGT	57.498
TRINITY_DN19576_c0_g1_i1_gene=TRINITY_DN19576_c0_g1_len=1704	(A)10	TCGTATGCTGCAAATTCAGG	59.833	CAAAGAAAGTGGTCGTGCAG	59.485
TRINITY_DN19587_c0_g1_i2_gene=TRINITY_DN19587_c0_g1_len=896	(T)10	CTGCAATGCCATCTCTCAAA	59.948	CCAAAACAAAGTCTCGCACTC	59.906
TRINITY_DN19594_c0_g1_i1_gene=TRINITY_DN19594_c0_g1_len=1470	(A)11	CGCCTAAAATTGCGATCAGA	61.225	AAGGATTGTGAATGGGGACA	60.173
TRINITY_DN19598_c0_g1_i1_gene=TRINITY_DN19598_c0_g1_len=1566	(T)11	GTGACCAACAAGCAAAGCAA	59.888	AATAGAAATTCGCGCAGACC	59.324
TRINITY_DN19607_c0_g1_i2_gene=TRINITY_DN19607_c0_g1_len=1790	(AG)6	GAAAGGGACAACAAGAGAAGTCA	59.781	GATTGTGAATTGGGTGCTCA	59.502
TRINITY_DN19612_c0_g1_i1_gene=TRINITY_DN19612_c0_g1_len=260	(A)11	GAATGAAACTGCCTGCAACA	59.847	TTGGTGACTGCAAGCAAAAG	60.027
TRINITY_DN19618_c0_g1_i13_gene=TRINITY_DN19618_c0_g1_len=1966	(A)11	GCTGAAATGAAACATGCGAA	59.816	TACTCGTGTCTGCACGAACC	59.905
TRINITY_DN19651_c0_g1_i3_gene=TRINITY_DN19651_c0_g1_len=2020	(CAT)5	GGTTTTCCAGCATGAATAGCA	60.089	ATTCCGATGAAGACGAATGG	59.894
TRINITY_DN19653_c0_g3_i1_gene=TRINITY_DN19653_c0_g3_len=988	(CTT)6	AAAACTGATCCATCCGCAAC	59.939	CGTCGCTGAGTCGTAGTCAC	59.648
TRINITY_DN19671_c0_g1_i1_gene=TRINITY_DN19671_c0_g1_len=1227	(ATA)6	AACAACACACTTGGGAATTCAT	58.344	GGGAAAGGGAAGGTTATGGA	60.124
TRINITY_DN19671_c0_g1_i1_gene=TRINITY_DN19671_c0_g1_len=1227	(TGT)5	GAATTTTCAGGCCCATCAGA	60.014	TGCGAATTTTAGGGAGATGG	60.031
TRINITY_DN19685_c0_g1_i1_gene=TRINITY_DN19685_c0_g1_len=1655	(A)10	GTTGAGGTTGCAAAGCCATT	60.118	AAGTCGCGGTCTTCCATTTA	59.708
TRINITY_DN19701_c0_g1_i1_gene=TRINITY_DN19701_c0_g1_len=1086	(A)17	CCAATTTCATTCTTTAGCCAACA	60.342	TCTAATCAACCCGAAAACGC	60.074
TRINITY_DN19704_c0_g1_i2_gene=TRINITY_DN19704_c0_g1_len=795	(T)13	CCACCATTAACCCCACTTTA	57.341	TGACCTCGCTTCTCTCCATT	59.95
TRINITY_DN19744_c0_g1_i1_gene=TRINITY_DN19744_c0_g1_len=1776	(T)12	AAGCAGCACCAAGGAAGAAA	59.993	TTTTCTTTGCTGGATTTGGG	60.046
TRINITY_DN19744_c0_g1_i1_gene=TRINITY_DN19744_c0_g1_len=1776	(CT)7	GCCCAAACAAAAGGAGAAAA	59.178	TGGGCTTCAATGTCAGTGTC	59.682
TRINITY_DN19756_c0_g1_i1_gene=TRINITY_DN19756_c0_g1_len=1547	(A)10	CACAGATTCACAAAGGGACAAA	60.008	GGATGTTGGATGGGTTTCTG	60.173
TRINITY_DN19759_c0_g1_i2_gene=TRINITY_DN19759_c0_g1_len=1249	(ATC)5	GCCCAAGCTGTTTCAAACTC	59.859	TATGAGATCTCCGGTTTCGG	60.029
TRINITY_DN19760_c0_g1_i1_gene=TRINITY_DN19760_c0_g1_len=1190	(GA)7	ATTCATGTGCACCGTCGTAA	59.995	TTCCTCTCTCTTTTTGAACCTCA	59.508
TRINITY_DN19763_c1_g1_i1_gene=TRINITY_DN19763_c1_g1_len=1021	(T)16	TGCAAACATCCTCTCTTTCAA	58.488	TTGGACAACAACTTCCCATTT	59.322
TRINITY_DN19789_c0_g1_i4_gene=TRINITY_DN19789_c0_g1_len=896	(T)10	CGATGAAGGAGGAATTGGAA	60.006	ATCGGGACTTAAGCCAAACC	60.32
TRINITY_DN19795_c0_g1_i2_gene=TRINITY_DN19795_c0_g1_len=1172	(TAA)5	CAATGGAGGATCCGAAAAGA	60.006	TGAACCTCCACGAGCTTAGG	60.388
TRINITY_DN19804_c0_g2_i1_gene=TRINITY_DN19804_c0_g2_len=1133	(TTG)5	ATGATGACGTGTCGGTTTCA	59.967	GACTGACCACGTCACTCTCG	59.442
TRINITY_DN19808_c0_g1_i1_gene=TRINITY_DN19808_c0_g1_len=288	(A)12	CTTGCCAGAACTTCACCACC	60.69	TGAAGCCTATTTAATCTGAGCCA	60.226
TRINITY_DN19809_c0_g1_i1_gene=TRINITY_DN19809_c0_g1_len=1871	(T)12	CCGCGCTATTGGTAGAACAT	60.117	CGTGTGTGAAAAATGAACATCA	59.488
TRINITY_DN19814_c0_g2_i1_gene=TRINITY_DN19814_c0_g2_len=694	(A)12	CCCGTAAGAAGACACGGGTA	59.986	CCCATTCACACTCACACACC	59.846
TRINITY_DN19822_c0_g1_i1_gene=TRINITY_DN19822_c0_g1_len=465	(A)11	TAGGGAAACAGATTGGGTCG	59.926	CGAATGGACCTGTATCAACG	58.999
TRINITY_DN19824_c0_g1_i2_gene=TRINITY_DN19824_c0_g1_len=3269	(GGC)5	AGCGGTGTGGTGGTTTTTAG	60.03	AATTGGCCACTCTTTGAACG	60.11
TRINITY_DN19827_c0_g2_i3_gene=TRINITY_DN19827_c0_g2_len=905	(T)10	TCTCACGCATACACACCGTT	60.183	TTTGTGAAGGTGAAGGATTGG	59.956
TRINITY_DN19829_c0_g1_i1_gene=TRINITY_DN19829_c0_g1_len=1251	(A)15	TCAAAGAAAGCTTAGGGGCA	59.953	TGCTCCACTGTTGTCTCACC	59.872
TRINITY_DN19851_c0_g1_i1_gene=TRINITY_DN19851_c0_g1_len=1080	(T)10	AGAGTGTTGGCAATGGCTTT	59.74	TCTCTATATCAAACTCATCAAAACCG	59.931
TRINITY_DN19856_c0_g1_i1_gene=TRINITY_DN19856_c0_g1_len=1330	(T)13	TCAAACTTTGCATATTCCATGC	59.971	CCCCCACTGTCACAACCTAC	60.275
TRINITY_DN19877_c0_g1_i9_gene=TRINITY_DN19877_c0_g1_len=2548	(T)12	CGGTTGAGATGAAGAGAGGG	59.797	TGAGCCACTGGTTCCATTTA	59.123
TRINITY_DN19883_c0_g2_i1_gene=TRINITY_DN19883_c0_g2_len=348	(A)10	CGCCTTCCATCTGAATTGTT	60.074	GACGGGTTTTCTATGAAATTTTTG	60.107
TRINITY_DN19892_c0_g1_i1_gene=TRINITY_DN19892_c0_g1_len=3396	(AT)8	TGAATTCAAGTCCTTGTGGG	58.541	TGAGCGATTTACTCCTCGTG	59.024
TRINITY_DN19895_c0_g1_i1_gene=TRINITY_DN19895_c0_g1_len=2056	(AG)8	CAACCAGTGTTGTTGTTGGTG	59.947	TGCGTTACTCATCCCATTCA	60.073
TRINITY_DN19934_c0_g1_i2_gene=TRINITY_DN19934_c0_g1_len=1572	(A)12	ACCAAACGGAACCATTAGCA	60.365	CTTGGTTTGAAAGTGGCGAT	60.11
TRINITY_DN19934_c0_g1_i2_gene=TRINITY_DN19934_c0_g1_len=1572	(A)11	CAATTCACATGCACAAAAACA	58.089	GGGATGCAGCAGGATAGAGA	60.326
TRINITY_DN19938_c0_g1_i6_gene=TRINITY_DN19938_c0_g1_len=2137	(A)14	AACCAAACCTTTCAACGCTC	59.218	TTTGTCTGCTCTCAGAAGGTGA	60.171
TRINITY_DN19938_c0_g1_i6_gene=TRINITY_DN19938_c0_g1_len=2137	(A)10	TCACCTTCTGAGAGCAGACAAA	60.171	TGGGGTGCTGTAAAGATTCA	59.123
TRINITY_DN19940_c0_g1_i6_gene=TRINITY_DN19940_c0_g1_len=1055	(A)10	CAAATGGAGAATTTGAAGTTAGCA	59.68	GAGAAAACGGCTTGACCTGA	60.375
TRINITY_DN19946_c0_g1_i1_gene=TRINITY_DN19946_c0_g1_len=1320	(T)10	GTATCCTTTCACGCAACGGT	60	AACAAGTTCATGGCAGGTCC	59.973
TRINITY_DN19950_c0_g1_i3_gene=TRINITY_DN19950_c0_g1_len=928	(CTT)5	ATGGTGGTGCTTCTTTCCAT	59.41	CATGCTCACAGGCACAAGAT	59.862
TRINITY_DN19956_c1_g1_i1_gene=TRINITY_DN19956_c1_g1_len=1433	(A)14	AAAATCGCCATGAATGGAAG	59.901	TATGGCTGTGGGTTTGTTGA	59.964
TRINITY_DN19959_c0_g1_i1_gene=TRINITY_DN19959_c0_g1_len=841	(A)11	TCGAACTTGAAGATGAGCCA	59.522	CATGCAAAATCTCTGCTCCA	59.948
TRINITY_DN19960_c0_g1_i2_gene=TRINITY_DN19960_c0_g1_len=358	(T)10	CCGCGCATAATTTATTTAACG	59.523	CAGGAATTGGTTTGTCTCTTTTC	59.165
TRINITY_DN19989_c0_g2_i3_gene=TRINITY_DN19989_c0_g2_len=532	(T)11	TGAGTGCTTTCGTGCTCAAT	59.596	TTACATTTATGGTGCGCCTG	59.585
TRINITY_DN19993_c0_g1_i1_gene=TRINITY_DN19993_c0_g1_len=939	(A)10	GCTCAACCCAATTTGCTCAT	60.081	TGAAGTCGGAGAACCAAAGG	60.224
TRINITY_DN20000_c0_g2_i1_gene=TRINITY_DN20000_c0_g2_len=673	(CAT)7	TGAAATCAAATTGTGATCCTTTT	57.674	GAATTCGGTCGGTGTTGTTT	59.836
TRINITY_DN20007_c0_g1_i3_gene=TRINITY_DN20007_c0_g1_len=2756	(AG)9	CGTCGTCATAACAACCACCA	60.427	CGCTTCGTTAGGGATCAGAG	59.971
TRINITY_DN20016_c0_g1_i1_gene=TRINITY_DN20016_c0_g1_len=1673	(A)15	TGCCCCAAAATTAAAATCACA	60.171	ATTGAGGCATTGGAAAGGTG	59.933
TRINITY_DN20017_c0_g1_i1_gene=TRINITY_DN20017_c0_g1_len=1152	(GAA)5	CCGTATCCGAAATTTGTTGC	60.323	CTGTTGGTGGAGTTCCTCGT	60.151
TRINITY_DN20026_c0_g1_i2_gene=TRINITY_DN20026_c0_g1_len=790	(CAT)5	CGATTTCTCTGCCAAGGTTC	59.813	CGGAGATGCTGATGAAGACA	59.942
TRINITY_DN20069_c0_g1_i1_gene=TRINITY_DN20069_c0_g1_len=1631	(A)10	ATGGCATTCCATTGAACACA	59.781	GCGAAGCAAGATAGGGATGA	60.318
TRINITY_DN20101_c0_g2_i1_gene=TRINITY_DN20101_c0_g2_len=1601	(TA)8	TCGTCGTTGTTGACCATCAT	59.967	CTTCATTCTTCTTCACCGCC	59.813
TRINITY_DN20103_c0_g1_i4_gene=TRINITY_DN20103_c0_g1_len=1495	(TCT)6	AGAGACATCGAAGCGAAGGA	60.096	GGCGCTTACAGTTCAAGTCC	59.882
TRINITY_DN20129_c0_g1_i2_gene=TRINITY_DN20129_c0_g1_len=1410	(TC)6	TCCTCAATCGCTTCTTTCGT	59.955	GATCGAAGCTTTTGGGACAG	59.813
TRINITY_DN20134_c0_g2_i2_gene=TRINITY_DN20134_c0_g2_len=3448	(T)10	ACTATTGCCACTGCCATTCC	59.962	GATTGAGGTTTGCTCTTGCC	59.82
TRINITY_DN20145_c0_g2_i1_gene=TRINITY_DN20145_c0_g2_len=1124	(T)12	CGGCTCTTCCGTTGTTGTAT	60.132	AGTACCTCCCTACCGCAACC	60.382
TRINITY_DN20150_c0_g1_i3_gene=TRINITY_DN20150_c0_g1_len=1456	(GGA)5	ATGCGGATTGAAGAATGGAG	60.036	ACCACCAAAAACCAAATCCA	60.066
TRINITY_DN20152_c0_g1_i1_gene=TRINITY_DN20152_c0_g1_len=1536	(GCG)5	GGACATCGATTCCAGTGCTT	60.081	TGACGGCTGAGATTGAAGTG	59.984
TRINITY_DN20190_c0_g1_i1_gene=TRINITY_DN20190_c0_g1_len=1724	(T)10	TGGATCTTGCGAATTGTTGA	60.197	TTTAATCACCCAAGAGGGTTTT	58.907
TRINITY_DN20201_c0_g1_i1_gene=TRINITY_DN20201_c0_g1_len=1762	(T)11	GTGATGCGTCATCTTCGCTA	59.979	CACCAAATGCAAGGAAGGTT	59.971
TRINITY_DN20204_c0_g1_i6_gene=TRINITY_DN20204_c0_g1_len=1279	(TCT)5	CCCTCTTCGTCTTCTCCATC	58.816	CAAAGAGGGAGATAAAGGGTCA	59.588
TRINITY_DN20204_c0_g1_i6_gene=TRINITY_DN20204_c0_g1_len=1279	(TCT)5	TCTTCTACCTCCTTCATCTCTTCTT	58.327	TCGGTTTAACCAAATCTTTCTCA	59.991
TRINITY_DN20210_c0_g1_i3_gene=TRINITY_DN20210_c0_g1_len=1782	(TTA)7	GGAAAAGCATGAGAGCAACC	59.82	TGGTTTACTTGGTGATGTTGG	58.392
TRINITY_DN20215_c3_g2_i2_gene=TRINITY_DN20215_c3_g2_len=470	(A)10	CATAGCGGTGCAGTTCTTGA	60.011	CATTGTCCATCTCCGTTTGA	59.496
TRINITY_DN2022_c0_g1_i1_gene=TRINITY_DN2022_c0_g1_len=717	(AAG)5	CAAGCAGTAGGCAGCAACAA	60.195	TTTGAGGACGAAAATACGGC	60.074
TRINITY_DN20244_c0_g1_i1_gene=TRINITY_DN20244_c0_g1_len=1242	(TCT)5	TCCAAACTTTGTCACACCCA	59.976	ATGCAGAACGTTGTGATGGT	59.014
TRINITY_DN20245_c0_g1_i1_gene=TRINITY_DN20245_c0_g1_len=1097	(GTT)5	CGTCATCATCGTCGTCATCT	59.663	CCTTCAAAATCCAACAACGG	60.336
TRINITY_DN20268_c0_g2_i2_gene=TRINITY_DN20268_c0_g2_len=1520	(A)11	ATATCACTTTCGCCGCTCAG	60.374	ACCCCTCAGTGTTGCCATAG	59.989
TRINITY_DN20268_c0_g2_i2_gene=TRINITY_DN20268_c0_g2_len=1520	(A)10	CGCTCAGGTTCTCTTCCTGA	60.668	ACCCCTCAGTGTTGCCATAG	59.989
TRINITY_DN20272_c0_g2_i1_gene=TRINITY_DN20272_c0_g2_len=1357	(A)10	CCTGCTATCTACGTTCCCTCC	60.103	CTTTGGGGACAAGATTCCAA	59.903
TRINITY_DN20279_c0_g1_i2_gene=TRINITY_DN20279_c0_g1_len=2440	(AAC)5	TGCTCCGGTTGATTATACCC	59.784	CGCCATCTCATACTGGTTCA	59.673
TRINITY_DN20287_c0_g1_i1_gene=TRINITY_DN20287_c0_g1_len=3313	(A)10	GGAAACTCCGAAACCCATTT	60.166	TTCTCCGCCGTATCAAATTC	60.038
TRINITY_DN20287_c0_g1_i1_gene=TRINITY_DN20287_c0_g1_len=3313	(A)12	TGCATTGTCTTCTAGCATCTCG	60.543	TCCTGGATTCGCTGATTCTT	59.773
TRINITY_DN20305_c0_g1_i1_gene=TRINITY_DN20305_c0_g1_len=1389	(GCA)6	TGCTTCATCAACTTGGCAAT	59.276	GATAACGAAATCACTGCGCC	60.615
TRINITY_DN20316_c0_g1_i2_gene=TRINITY_DN20316_c0_g1_len=2116	(T)10	CATCTTCTTCCTCGATCCCA	60.15	CACATTGTTTGCGTTCCAGT	59.615
TRINITY_DN20322_c0_g1_i2_gene=TRINITY_DN20322_c0_g1_len=1783	(AG)6	CCCGATCCATACCTTGAATG	60.148	TGAAGTGCGATGGAAAATGA	60.197
TRINITY_DN20341_c0_g1_i1_gene=TRINITY_DN20341_c0_g1_len=1500	(A)11	GAAAAACTGATAATTGTTTTCCCC	59.211	CATCAGTTGTTGCTAGCCGA	60.011
TRINITY_DN20346_c0_g1_i2_gene=TRINITY_DN20346_c0_g1_len=3802	(GT)6	TCACCTTGTCCGCTTTAACC	60.11	TGAATGCATGCGAAATCAAT	60.043
TRINITY_DN20346_c0_g1_i2_gene=TRINITY_DN20346_c0_g1_len=3802	(TA)6	TGAATGTGATCAGGATTTTTGC	59.945	CACAGAAATCAATGCGAGGA	59.799
TRINITY_DN20348_c0_g1_i1_gene=TRINITY_DN20348_c0_g1_len=1170	(A)11	ATAATGGGGGTGGTCATGTG	60.317	CTGGACGTGATCTGTTGCAT	59.707
TRINITY_DN20380_c0_g1_i2_gene=TRINITY_DN20380_c0_g1_len=627	(TTG)5	AAGTTGAAGGGGTGGGTTTC	60.204	TTCTACCCTCGTCCACAACC	59.966
TRINITY_DN20390_c0_g1_i2_gene=TRINITY_DN20390_c0_g1_len=1233	(AGA)5	CACATTCGCTTCAACGAAGA	59.988	AGAACCGTTGCAGTTATGGG	59.993
TRINITY_DN20390_c0_g1_i2_gene=TRINITY_DN20390_c0_g1_len=1233	(TTG)6	CCCATAACTGCAACGGTTCT	59.993	GACTTTCGTTCAAAACCTCTCA	58.486
TRINITY_DN20390_c0_g1_i2_gene=TRINITY_DN20390_c0_g1_len=1233	(A)11	TATCGAACGGTGAACGAACA	60.111	GGGTTTTGTGTGGTGTGGAT	60.533
TRINITY_DN20394_c0_g1_i6_gene=TRINITY_DN20394_c0_g1_len=1364	(T)12	CCGGGTAATCGAATTGAAGA	59.894	CCAACTCAAATCCGTGGGTA	60.745
TRINITY_DN20398_c0_g1_i2_gene=TRINITY_DN20398_c0_g1_len=946	(T)13	ACAAGCGAGTAGACTCGGGA	60.012	GCAACGCAACCAAAAGTACA	59.776
TRINITY_DN20407_c0_g3_i1_gene=TRINITY_DN20407_c0_g3_len=432	(A)12	CCCAACATCAACAACACACC	59.701	CAACTTTTCTTAGTTTTGGGCTTT	59.32
TRINITY_DN20420_c1_g2_i1_gene=TRINITY_DN20420_c1_g2_len=1206	(A)11	CCCCCAACTAATACAACGGA	59.679	GGAGTCTTGTTTGGGTTGCT	59.187
TRINITY_DN20421_c0_g3_i1_gene=TRINITY_DN20421_c0_g3_len=2061	(T)12	CCCTTTGATACAATTAATAAAGAAATG	57.858	AGCTGTGATTTGATTTGATATGC	58.287
TRINITY_DN20426_c0_g1_i8_gene=TRINITY_DN20426_c0_g1_len=3604	(T)15	CACGGCACAGGTCAAATGTA	60.574	TTGCGCAAAGTTTGTTTTTG	59.895
TRINITY_DN20438_c0_g1_i12_gene=TRINITY_DN20438_c0_g1_len=1369	(T)10	GAGCCCTTTTTAGGGTTTCA	58.303	ATCAACCAGGAACACCAAGC	59.973
TRINITY_DN20438_c0_g1_i12_gene=TRINITY_DN20438_c0_g1_len=1369	(AGA)5	TGAACCATTCTTCCAAAAAGAAA	59.971	TTCTTCCTACCTTTTTGATTCCTC	59.202
TRINITY_DN20443_c0_g1_i3_gene=TRINITY_DN20443_c0_g1_len=1608	(TA)10	TGAACAATCCATGTTTGGGA	59.75	TCCACTCACTTTCCTTCCTCA	59.829
TRINITY_DN20444_c0_g1_i4_gene=TRINITY_DN20444_c0_g1_len=1053	(A)14	TCAAGCCTTTTCCAACATCC	60.051	TTGTGTTGAATCCGATTAGGG	59.809
TRINITY_DN20450_c0_g1_i3_gene=TRINITY_DN20450_c0_g1_len=2095	(T)10	AGGATTGAATCGTGAATCGG	59.894	GGCCTTGGTAGCCAACTACA	60.132
TRINITY_DN20456_c0_g1_i1_gene=TRINITY_DN20456_c0_g1_len=1780	(T)10	CAGCAATGCCACGAGAAGTA	60.011	AGTCCATGGCTAGTGCTGCT	60.043
TRINITY_DN20457_c0_g1_i3_gene=TRINITY_DN20457_c0_g1_len=1872	(T)10	GAGCCCTTAGGAGAGCCTGT	59.979	TTCTTGGGTTGTTTTGTTTTGA	59.509
TRINITY_DN20481_c0_g1_i1_gene=TRINITY_DN20481_c0_g1_len=219	(TACA)5	TGCCGTACTAAAATTCACACCA	60.409	TCGTGTCACAATCTCGTTGA	58.784
TRINITY_DN20481_c0_g3_i1_gene=TRINITY_DN20481_c0_g3_len=1471	(T)10	CGCCGCAAATTAGAAAGAAA	60.327	CCTCACCTACTCAACTCCTCTCA	59.924
TRINITY_DN20492_c0_g1_i5_gene=TRINITY_DN20492_c0_g1_len=615	(A)10	CTCCTCCCCCTCTTGTTTCT	59.671	GGTTTCATGGAACTCAGGTCA	59.958
TRINITY_DN20496_c0_g1_i1_gene=TRINITY_DN20496_c0_g1_len=1207	(A)12	TCACCAAAATTTACCACCCA	58.719	CGAAATGCTTTTCCCAAATG	60.427
TRINITY_DN20498_c0_g1_i1_gene=TRINITY_DN20498_c0_g1_len=1502	(GAA)5	TAGGTTTGGGAGGTGCTTTG	60.103	AGACGGTGTTTTTGAATCCG	59.971
TRINITY_DN20502_c0_g1_i3_gene=TRINITY_DN20502_c0_g1_len=1150	(A)11	CAAGCAATTTCAAAGCCCTC	59.823	TTGAAGAATGTGGCTGACCA	60.24
TRINITY_DN20538_c0_g1_i1_gene=TRINITY_DN20538_c0_g1_len=958	(TGA)7	TCCAAGGCATCTTTGAATCC	60.014	TCCATGGTAGCACTTTCAGG	58.722
TRINITY_DN20545_c0_g1_i1_gene=TRINITY_DN20545_c0_g1_len=1511	(A)15	TCCTTCAACATAATTTACAAACTCAAA	59.446	AAGTTTTGGGGACTTGTGGA	59.425
TRINITY_DN20548_c0_g1_i1_gene=TRINITY_DN20548_c0_g1_len=2368	(T)11	AAGCCAGAATGGTGACCTTG	60.111	CCCTCTTTTTCACATCCCAA	59.903
TRINITY_DN20575_c0_g1_i1_gene=TRINITY_DN20575_c0_g1_len=648	(TGT)5	ATCGCCATCCTTGTATCTGC	60.066	TCGTTGTTCTCTCGTCTCCC	60.386
TRINITY_DN20579_c0_g2_i1_gene=TRINITY_DN20579_c0_g2_len=393	(T)10	TAGCTGCAAACACTCCCAAA	59.464	TCCAAAAGCCGCCATTATAG	60.054
TRINITY_DN20600_c0_g1_i1_gene=TRINITY_DN20600_c0_g1_len=773	(A)13	ATGCTGGGACTTCACAAACC	59.973	CAATCCTGCTTTTCAGCTCC	59.955
TRINITY_DN20615_c0_g1_i8_gene=TRINITY_DN20615_c0_g1_len=2950	(A)11	TCAGGAAGCCTCCAGAAGAA	60.065	TGCTGTACCCCGTGTACTTG	59.634
TRINITY_DN20619_c0_g1_i2_gene=TRINITY_DN20619_c0_g1_len=1845	(TA)15	GCTGTGTTCTCGGCTTCTTT	59.621	CATGGAGACAGCATGATACACC	60.406
TRINITY_DN20649_c0_g4_i1_gene=TRINITY_DN20649_c0_g4_len=651	(CA)6	ACGCCTTCCTGAACCTTCTT	60.247	TAGAATCTCCGCGTCGTCTT	59.978
TRINITY_DN20671_c0_g3_i1_gene=TRINITY_DN20671_c0_g3_len=422	(A)11	TACCTCTCGGCACGAACTCT	60.012	AGCCTCTGTCTGGTGCACAT	60.894
TRINITY_DN20685_c1_g1_i2_gene=TRINITY_DN20685_c1_g1_len=3791	(A)11	AAGAAAACTGTGCGAGTGGG	60.291	TCCCCCTCATAACAACCAAA	60.162
TRINITY_DN20693_c0_g1_i3_gene=TRINITY_DN20693_c0_g1_len=1371	(ATT)5	CTAACAGATGTGGGCCCTGT	59.989	TGAAGGTTTTCCTGAATGGG	59.903
TRINITY_DN20702_c0_g1_i1_gene=TRINITY_DN20702_c0_g1_len=1116	(T)11	AGGCTTTCAATGCTGCCTTA	59.982	AATTGTATGCCAGTTCCAAAAA	58.543
TRINITY_DN20702_c1_g1_i2_gene=TRINITY_DN20702_c1_g1_len=1981	(AT)14	TCATTTCAACGTACCAATGGAT	59.205	ATTTGGAGGGTTTTTGGGAC	60.032
TRINITY_DN20735_c0_g1_i1_gene=TRINITY_DN20735_c0_g1_len=1857	(GAG)5	AAGTTTGCTACGGTGGTTGG	60.03	AAAACAATGGCCACCTCAAC	59.836
TRINITY_DN20739_c0_g1_i1_gene=TRINITY_DN20739_c0_g1_len=1084	(GAA)5	GATGCACGTTTCAGCTTTGA	59.995	GGAAATGACCGTTTGACTAATTTC	60.114
TRINITY_DN20747_c0_g1_i5_gene=TRINITY_DN20747_c0_g1_len=2805	(A)10	AGATCATTAATCGCCGCATC	60.03	TTTGGTGGGGGAAATGTAAA	60.024
TRINITY_DN20748_c0_g1_i2_gene=TRINITY_DN20748_c0_g1_len=1661	(GGA)5	AAGGGTCATGAACGGTGAAG	59.966	ACCATGGCCAGTTTCAGTTC	59.973
TRINITY_DN20749_c0_g1_i2_gene=TRINITY_DN20749_c0_g1_len=1083	(A)12	ATCGGAATCCAAATCAGCAG	60.036	CTGGGTTTTCCCCTTCTTCT	59.548
TRINITY_DN20757_c0_g1_i2_gene=TRINITY_DN20757_c0_g1_len=1672	(A)10	TGACCCTTCATCTTCGCTTC	60.34	GCAACAATGGGTTGTTTCATT	59.722
TRINITY_DN20764_c0_g1_i1_gene=TRINITY_DN20764_c0_g1_len=972	(T)11	TGGTGGAGGAGGATAAGGTG	59.92	CCAATCTGCCAACACAGAGA	59.831
TRINITY_DN20776_c1_g1_i1_gene=TRINITY_DN20776_c1_g1_len=2460	(T)11	CGAACATCAGAAACGACACTG	59.35	GCAGGAGGAAAGAATCATGC	59.78
TRINITY_DN20781_c0_g2_i1_gene=TRINITY_DN20781_c0_g2_len=357	(GA)14	CAGAATCCCAGACAATTAAAGTGA	59.539	TTCAGCTCCTCCTTCTTGGA	60.065
TRINITY_DN20782_c0_g1_i3_gene=TRINITY_DN20782_c0_g1_len=2081	(TC)7	GAGGTTGAATATGGTGGGAAAA	60.055	GCTGAACTAGGGAAAAGGGG	60.068
TRINITY_DN20784_c0_g1_i6_gene=TRINITY_DN20784_c0_g1_len=2493	(GTG)5	ACGGTGATAATCCGAGATGG	59.773	CGATGTCGTATGTTCCTCCA	59.522
TRINITY_DN20795_c0_g1_i1_gene=TRINITY_DN20795_c0_g1_len=1187	(T)10	CTTGGTTCAGGAGCTTTTGG	59.846	ACCAACTACCGAACTCACCG	60.028
TRINITY_DN20803_c0_g1_i5_gene=TRINITY_DN20803_c0_g1_len=2594	(GAT)5	AAAATATTTCAATTCTTAGTGATCCAT	57.075	CATCCAATCCAGCTGTGAAC	59.09
TRINITY_DN20805_c0_g1_i6_gene=TRINITY_DN20805_c0_g1_len=2101	(AAT)5	AAATCACTCCACTCCAACCG	59.966	CGATTCACCGTTACGATTCT	57.698
TRINITY_DN20805_c0_g1_i6_gene=TRINITY_DN20805_c0_g1_len=2101	(AAG)5	AGAATCGTAACGGTGAATCG	57.698	TCGCAACTCCTTCATCTTCA	59.522
TRINITY_DN20824_c0_g1_i1_gene=TRINITY_DN20824_c0_g1_len=1943	(GCG)5	CCGTAGTTGACGCCGATATT	59.982	CTTCTATCAAATTCCCCGCA	60.031
TRINITY_DN20826_c0_g1_i6_gene=TRINITY_DN20826_c0_g1_len=1256	(AT)6	CCAAATCAAAACCCATAACG	57.874	AGCCAATTGTTGTGTGTTGC	59.621
TRINITY_DN20826_c0_g1_i6_gene=TRINITY_DN20826_c0_g1_len=1256	(TGA)5	GCCAAAAGCGTTTCCAAATA	60.075	TCATTCACAAAAACAAGAAACCA	59.522
TRINITY_DN20827_c0_g1_i3_gene=TRINITY_DN20827_c0_g1_len=965	(AAC)5	CATCCAAACCATACCCAATCA	60.433	TGAAGTTAGCAATGGGGCTC	60.214
TRINITY_DN20835_c0_g1_i1_gene=TRINITY_DN20835_c0_g1_len=851	(T)10	CGTTCTTACACACAAATTCCCC	60.623	TGCAGGTGATGAAGGTTTGT	59.139
TRINITY_DN20842_c0_g1_i3_gene=TRINITY_DN20842_c0_g1_len=1584	(TTG)5	CTGGGCTTGAATGAATTGGT	59.933	TGGCCTTCGTTTATCATTCG	60.961
TRINITY_DN20842_c0_g1_i3_gene=TRINITY_DN20842_c0_g1_len=1584	(TTG)5	TAGTCCTAATGCTCCCGGTG	60.088	TTCTCAAACCATTCCTCAACA	58.187
TRINITY_DN20847_c0_g1_i3_gene=TRINITY_DN20847_c0_g1_len=2631	(A)10	TCAGGATCCAATCAACACAAAA	60.344	TGTTGATGATGATGCTGCAA	59.789
TRINITY_DN20852_c0_g1_i2_gene=TRINITY_DN20852_c0_g1_len=344	(T)11	AGTGCCACTCTGATTTCGCT	60.02	AGCTGATCAACACCCTGCAT	60.688
TRINITY_DN20854_c0_g1_i1_gene=TRINITY_DN20854_c0_g1_len=1579	(A)10	CAATCATTCAAGAACACGCA	58.259	TCCACAGGGTTCTTCTCAGG	60.229
TRINITY_DN20860_c0_g1_i2_gene=TRINITY_DN20860_c0_g1_len=668	(A)10	TGATTTTCAGCGGAGAGCTT	60.096	CACAATCCGTACAGCACTCA	58.276
TRINITY_DN20860_c0_g2_i2_gene=TRINITY_DN20860_c0_g2_len=572	(T)10	CACAATCCGTACAGCACTCA	58.276	TGATTTTCAGCGGAGAGCTT	60.096
TRINITY_DN20861_c0_g1_i2_gene=TRINITY_DN20861_c0_g1_len=1068	(A)10	CTCTCAAAATTGCACCAGCA	59.988	TCAAGGAGTTGTGGGGTTTC	59.943
TRINITY_DN20863_c0_g1_i4_gene=TRINITY_DN20863_c0_g1_len=2108	(T)15	CGGTTGGAGTAACGGAGTGT	60.028	AAAACCAACTACCTAACGAACCA	59.024
TRINITY_DN20865_c1_g1_i2_gene=TRINITY_DN20865_c1_g1_len=758	(AAC)6	ACACAAAACTCCCATTCCCA	60.21	TGAGAGAGAGAGGGGTGCAT	59.945
TRINITY_DN20865_c2_g1_i3_gene=TRINITY_DN20865_c2_g1_len=3015	(AG)6	CAACAACAGTCAAAACCCCA	59.435	TTCTGCACCGAAGATTAGGG	60.206
TRINITY_DN20865_c2_g1_i3_gene=TRINITY_DN20865_c2_g1_len=3015	(A)13	CCAAACATCCATGCAAACAG	59.964	TGGACGTGAACTAAATGGAATG	59.861
TRINITY_DN20865_c2_g1_i3_gene=TRINITY_DN20865_c2_g1_len=3015	(AAC)8	TGGTCCAATTTCAAAGGGAA	60.28	TTTCGAATTTTGGGGTTTTG	59.783
TRINITY_DN20873_c0_g4_i1_gene=TRINITY_DN20873_c0_g4_len=398	(A)10	AAAGCCCAAAGGTTATCCCA	60.664	GCCTAGCTTGGTTATGTGCC	59.736
TRINITY_DN20878_c0_g1_i1_gene=TRINITY_DN20878_c0_g1_len=1214	(GGT)5	CATTAGCAGGCCTGTTCTCC	59.836	GATCTCAGCGAATCAAGGCT	59.537
TRINITY_DN20878_c0_g2_i1_gene=TRINITY_DN20878_c0_g2_len=321	(A)10	AATTCCAGTTGGTGGCATCT	59.41	GTTCTGATCTGATTCAATATGCTG	57.912
TRINITY_DN20894_c0_g1_i1_gene=TRINITY_DN20894_c0_g1_len=1122	(A)12	CATTGAAACCATTTCGCTCA	59.664	CGGTGAAGCAAAATTACGGT	59.996
TRINITY_DN20915_c0_g1_i4_gene=TRINITY_DN20915_c0_g1_len=1253	(TCA)5	TCAGTTGGAGGCATAGGAGG	60.21	TCAAACTTCATGGCTTTCCC	60.051
TRINITY_DN20924_c0_g2_i2_gene=TRINITY_DN20924_c0_g2_len=2741	(A)10	GTTCACAGCTTGGCACACAG	60.51	CGAGTTATTTTGCTTTATTTCACC	58.399
TRINITY_DN20934_c0_g1_i2_gene=TRINITY_DN20934_c0_g1_len=1351	(CT)9	GGCATGTTAACTGACCCACC	60.24	CAATGGGATCCAAGAACAAGA	59.918
TRINITY_DN20945_c0_g1_i2_gene=TRINITY_DN20945_c0_g1_len=728	(T)10	GCCAGGAGTTGGAGAGTGAG	59.986	TCAAGGCCCATTTGTCTGT	59.074
TRINITY_DN20952_c0_g1_i3_gene=TRINITY_DN20952_c0_g1_len=695	(A)11	ATTGTCCACTCCCCACTGAT	59.232	GTATATTCTTGGGTGCGGGA	59.784
TRINITY_DN20957_c0_g2_i1_gene=TRINITY_DN20957_c0_g2_len=945	(A)12	ATCACCAAAATCCTTGCTGG	59.933	CTGACCAAATCTGAATCTGGG	59.536
TRINITY_DN20961_c0_g1_i5_gene=TRINITY_DN20961_c0_g1_len=4873	(A)10	ACAAAACTTCATGTAAACCAAAATTA	57.451	TTGAGCAAGCTATTGGAGCA	59.712
TRINITY_DN20971_c1_g3_i2_gene=TRINITY_DN20971_c1_g3_len=801	(A)10	TGAAAATGCAGACTTGGCAG	59.988	TGCATGTTCCATCCATCACT	59.925
TRINITY_DN20975_c0_g1_i2_gene=TRINITY_DN20975_c0_g1_len=827	(CT)9	CCCCACAAAGTTCCCATTCT	61.103	GGTTGTAATGTTGGATGTGTGG	60.015
TRINITY_DN20979_c0_g1_i1_gene=TRINITY_DN20979_c0_g1_len=848	(A)14	CATCCTTCCACTGCCATCTT	60.073	GTGCGACACTTGGTAAGGTT	57.729
TRINITY_DN20997_c0_g2_i1_gene=TRINITY_DN20997_c0_g2_len=404	(A)10	GCAGACAGCTTGGAACACTG	59.622	TGGGATTGATTAGGAGGCTT	58.597
TRINITY_DN21011_c0_g1_i1_gene=TRINITY_DN21011_c0_g1_len=1194	(TCA)6	AAAGACGGTGCATCCAAATC	59.939	AACTCAGGAGGTGGGTTCCT	59.968
TRINITY_DN21024_c0_g1_i8_gene=TRINITY_DN21024_c0_g1_len=1929	(AC)8	CAACACCCTCAAAAACTCAAATC	59.9	ACACATCAAAGCCCCTGTTC	59.973
TRINITY_DN21031_c0_g1_i11_gene=TRINITY_DN21031_c0_g1_len=1773	(T)11	CAACTCCTCCAAATGTTTCCA	59.956	AATTCGGACCCCACTTTTTC	60.166
TRINITY_DN21033_c0_g1_i2_gene=TRINITY_DN21033_c0_g1_len=2055	(GGT)5	CCCTTCTCAATTCCTCCTCC	60.008	TTCAAATTTCGTGCCATTGA	60.051
TRINITY_DN21033_c0_g1_i2_gene=TRINITY_DN21033_c0_g1_len=2055	(T)10	TCAATGGCACGAAATTTGAA	60.051	CCCCCAAATGGATATTGGTT	60.614
TRINITY_DN21052_c0_g1_i1_gene=TRINITY_DN21052_c0_g1_len=2430	(A)10	CCACGTTAACAGCATTGGAG	59.195	GCAACAGATGTTGTGGTTGG	60.008
TRINITY_DN21061_c0_g1_i2_gene=TRINITY_DN21061_c0_g1_len=734	(A)10	TCCTAGCATGCATCAGTTTGA	59.435	GAGCATTTAGTGGTGATGGCT	59.212
TRINITY_DN21074_c1_g3_i1_gene=TRINITY_DN21074_c1_g3_len=1709	(A)10	TGGACTAGTAAGAAACATTGAAAGCA	60.534	TTGGACCTTGGTCTGGTAGC	60.111
TRINITY_DN21110_c0_g1_i3_gene=TRINITY_DN21110_c0_g1_len=1706	(GT)7	TAGGCGTGTCGTAGTGTTCG	59.928	TATCTGCTGGTTTGCTTGGA	59.42
TRINITY_DN21113_c2_g4_i1_gene=TRINITY_DN21113_c2_g4_len=587	(A)23	CATTACGCCAAAGTGGTGTG	60.027	TTTTTCTCTTCTTCTCGCCG	59.702
TRINITY_DN21113_c2_g6_i1_gene=TRINITY_DN21113_c2_g6_len=398	(A)24	ACGACTCACTGGTCAAGCCT	59.907	TTTTTCTCTTCTTCTCGCCG	59.702
TRINITY_DN21125_c1_g2_i1_gene=TRINITY_DN21125_c1_g2_len=1350	(AGA)5	AGCCAACACAGGTAAAAGGC	59.242	CCTTGGATGGTTGCTTTGAT	59.933
TRINITY_DN21126_c0_g1_i3_gene=TRINITY_DN21126_c0_g1_len=1172	(A)10	CGCGAAAGCCTGAATATTGT	60.23	ACCGGGAAAGATGGGTTATC	60.017
TRINITY_DN21135_c0_g1_i1_gene=TRINITY_DN21135_c0_g1_len=218	(A)11	TCAAATTAAACCAAAAGATCCAAA	58.977	GGCTTGGTTCATGAGATCGT	60.081
TRINITY_DN21135_c0_g2_i1_gene=TRINITY_DN21135_c0_g2_len=1369	(GTA)6	CTCTGTAAACCGGGTGGTTG	60.401	AAGGCAATGGGAGAGTTAGAGTT	59.685
TRINITY_DN21149_c0_g1_i1_gene=TRINITY_DN21149_c0_g1_len=1364	(AG)8	GGGGAAAACAGAAACCCATT	60.032	CAACGTCCCGTGTCAAAAC	59.992
TRINITY_DN21150_c0_g2_i2_gene=TRINITY_DN21150_c0_g2_len=342	(A)10	CGAGCAACCCATTTAAGAACA	60.117	TTGCTTTCCCAAATCCTTATTC	59.462
TRINITY_DN21156_c0_g1_i2_gene=TRINITY_DN21156_c0_g1_len=688	(A)10	TAATCCATCTGTTGGGAGCC	59.894	CTCGCACATTGCTGACCTAA	60.011
TRINITY_DN21162_c0_g2_i3_gene=TRINITY_DN21162_c0_g2_len=2116	(GA)8	CGTCTACGAACTCACGACCA	59.897	ATTGGAATTGGCCACACAAT	60.059
TRINITY_DN21163_c0_g1_i1_gene=TRINITY_DN21163_c0_g1_len=1814	(TTG)5	TCGTTGTTGTTGTGGACGAT	60.008	TGACTCTGTCTCATCGCACC	59.988
TRINITY_DN21163_c0_g1_i1_gene=TRINITY_DN21163_c0_g1_len=1814	(T)10	TGCTTTCATACCAGCAACAA	57.919	TTTGTGCACGAAAAGGAAAA	59.321
TRINITY_DN21173_c0_g2_i9_gene=TRINITY_DN21173_c0_g2_len=1247	(A)16	CTCTGCACCATTCAAATCCA	59.648	GTAGGTCCCACTTCCCACCT	60.23
TRINITY_DN2118_c0_g1_i1_gene=TRINITY_DN2118_c0_g1_len=540	(A)12	TGCAAACACCAATCTACCCTT	59.485	AGTGGCAACGAAAACAGAGG	60.291
TRINITY_DN21186_c0_g1_i2_gene=TRINITY_DN21186_c0_g1_len=1462	(T)10	AACCTGAAACGGTTTGCATT	59.476	CCGCGTTAACAGTTTGAACA	59.769
TRINITY_DN21186_c0_g1_i2_gene=TRINITY_DN21186_c0_g1_len=1462	(A)11	CACCGACGAATTTGACAACA	60.552	GGCAAGAGTTGTTTGGGTTC	59.574
TRINITY_DN21194_c0_g1_i3_gene=TRINITY_DN21194_c0_g1_len=3255	(ATC)5	TCAGTGTTCGTGTCCGAAAG	59.873	CAAGAACACCCCTTGGTCAT	59.82
TRINITY_DN21194_c0_g1_i3_gene=TRINITY_DN21194_c0_g1_len=3255	(A)10	TGGCATTGTGTCAGCTCATT	60.272	ACGGACACCGGAAATACAAC	59.717
TRINITY_DN2120_c0_g1_i1_gene=TRINITY_DN2120_c0_g1_len=302	(T)11	TGCCAGATTTTAATCCCACC	59.762	CCAAAATGTTGTGTGGGAGA	59.389
TRINITY_DN21221_c0_g1_i1_gene=TRINITY_DN21221_c0_g1_len=1055	(TGT)5	CAGCTTGGCTTTGTTTGGTT	60.284	CCTCATGTTTTGCTATGAGACC	58.72
TRINITY_DN21264_c1_g1_i13_gene=TRINITY_DN21264_c1_g1_len=2476	(T)14	TGGGTATGTAGGGGTTGGAA	60.044	GAGTCCCCTTTTCTCTCGCT	59.957
TRINITY_DN21272_c0_g1_i2_gene=TRINITY_DN21272_c0_g1_len=1917	(ATT)5	CGACAAAAGGGTAGGCAAAA	60.103	AATGGAAATTGCTCAAACGC	60.081
TRINITY_DN21288_c0_g2_i2_gene=TRINITY_DN21288_c0_g2_len=2057	(ATT)7	CATCACAATCCGTGGCTCTA	59.673	GGATTCGAGGCAGACGAATA	60.177
TRINITY_DN21297_c0_g1_i1_gene=TRINITY_DN21297_c0_g1_len=1484	(TTG)6	TACGGAACCCATTTTCCAGA	60.301	CCCTCACAGCATTCATCCTT	60.073
TRINITY_DN2130_c0_g1_i1_gene=TRINITY_DN2130_c0_g1_len=370	(TCT)6	ACCAGCCAAAAACAGAATGG	59.971	TCCCATCCAAAACTGAAACC	59.767
TRINITY_DN21300_c0_g1_i1_gene=TRINITY_DN21300_c0_g1_len=2516	(GTG)5	CGGATTGTGGTTTGTTGAAA	59.415	AAAAGACAAGGGCAAAAACG	59.244
TRINITY_DN21310_c0_g1_i1_gene=TRINITY_DN21310_c0_g1_len=504	(A)11	CCAATAGCCCGTGCTTAAAA	60.089	GCCGAATTGACGATACAGGT	59.962
TRINITY_DN21314_c0_g1_i5_gene=TRINITY_DN21314_c0_g1_len=4204	(A)10	CCCCAAAATTGAAGCAAGAA	60.046	TGCTTGAACTGTGGATGGAA	60.24
TRINITY_DN21335_c1_g3_i3_gene=TRINITY_DN21335_c1_g3_len=2163	(A)10	AAGAGATCTGCAACCCCTCA	59.803	TGGTAATGCCGAGTCAATCA	60.073
TRINITY_DN21336_c6_g2_i1_gene=TRINITY_DN21336_c6_g2_len=1559	(AG)6	GGTGAGGTGGAACACGACTT	60.009	GGGGGATTCAATTCATTTTG	59.067
TRINITY_DN21352_c1_g2_i1_gene=TRINITY_DN21352_c1_g2_len=323	(AG)6	AACGCCTCAAAGCTGAGAAA	60.132	TGTCTGGACCAATGGGATTT	60.173
TRINITY_DN21358_c0_g3_i1_gene=TRINITY_DN21358_c0_g3_len=834	(AT)7	CTTTGCCAAATCCACCAACT	59.971	TTCCGGGTTTTGCTTAAAAA	59.576
TRINITY_DN21373_c0_g6_i1_gene=TRINITY_DN21373_c0_g6_len=1055	(A)11	TCAACACGACCAACGGTTTA	60.004	TTTCTGTTTTGATTTTTCATTGC	58.344
TRINITY_DN21377_c0_g1_i12_gene=TRINITY_DN21377_c0_g1_len=1982	(AAAC)6	CAGACCTCAACCATGGGACT	59.962	ATTGTTCCTCTGGGTCGTTG	59.966
TRINITY_DN21406_c0_g1_i1_gene=TRINITY_DN21406_c0_g1_len=1496	(T)14	TCTTGCCGCATAAGCCTACT	60.003	ATTCTGCTAGGTGGACGGTG	60.134
TRINITY_DN21407_c0_g1_i1_gene=TRINITY_DN21407_c0_g1_len=2823	(A)12	AACTTGAGTTCGGCAGTGCT	60.058	CTTACTCTTCGGTTGGCTCG	60.008
TRINITY_DN21409_c0_g2_i8_gene=TRINITY_DN21409_c0_g2_len=2354	(A)12	CGGAACACAGTTAGATGCAGA	58.937	ATGCCGATTTTTCGTTGTGT	60.374
TRINITY_DN21415_c0_g1_i2_gene=TRINITY_DN21415_c0_g1_len=2278	(CTT)5	CACAACCTGCTTCGATCTTG	59.44	GTGAAGTTGGGAAGAACCGA	60.088
TRINITY_DN21416_c0_g1_i6_gene=TRINITY_DN21416_c0_g1_len=2179	(T)10	GCTTAGCCCTCCAAACAAAC	58.836	ATTCCTCCGCTGGATCCTAT	59.888
TRINITY_DN21419_c0_g1_i6_gene=TRINITY_DN21419_c0_g1_len=1673	(AG)7	GGCCCATGTGTGTTTCTCTT	59.973	ATCTCTCTCCGCCCTTTCTC	59.919
TRINITY_DN21427_c1_g1_i2_gene=TRINITY_DN21427_c1_g1_len=2154	(AATTGA)5	GAGAGAGGGAAATAACCGCC	60.039	GCACAGCACCCATAAAACCT	60
TRINITY_DN21437_c0_g1_i1_gene=TRINITY_DN21437_c0_g1_len=1170	(A)10	TATGGTGTGCTGCCATGAAT	59.955	AACTCGGCATGATTGAAAGG	60.074
TRINITY_DN21439_c0_g2_i1_gene=TRINITY_DN21439_c0_g2_len=2158	(TTG)7	CAGGTGCAGGAGAAGTCACA	60.022	CTCTCATTCTCAGCCCCAAA	60.331
TRINITY_DN21469_c1_g1_i1_gene=TRINITY_DN21469_c1_g1_len=210	(CAC)6	AATCCGTTGTTGCTGTTTCA	59.174	AGCCACCTCGGTTTCTTCTT	60.247
TRINITY_DN21473_c0_g2_i1_gene=TRINITY_DN21473_c0_g2_len=822	(A)12	CACCGAAAATCAACAAGCCT	60.11	AGATTAAAGAGGCGGGTGGT	59.962
TRINITY_DN21474_c0_g1_i2_gene=TRINITY_DN21474_c0_g1_len=443	(CCA)6	ACCACCACCACTACCACCAT	60.009	GCTAGTGCGGTTTTTCTTGG	59.883
TRINITY_DN21476_c1_g1_i4_gene=TRINITY_DN21476_c1_g1_len=2296	(A)10	TCTGATATAAGAAAATAACAGTGGGAA	58.686	CAAGCTATGTGCCACTCCCT	60.277
TRINITY_DN21479_c0_g1_i11_gene=TRINITY_DN21479_c0_g1_len=3014	(T)10	CAACATGGAAGGGAATCTGAA	59.918	CCTTCACGTGCTTCTTCGTT	60.431
TRINITY_DN21484_c0_g1_i1_gene=TRINITY_DN21484_c0_g1_len=647	(GCA)5	AAGCTGAATCCCATGTCGTC	60.081	CGCAGTCACTGGTGAGAAAA	60.025
TRINITY_DN21489_c0_g1_i1_gene=TRINITY_DN21489_c0_g1_len=2534	(A)10	GCCACAAACAGGTACACCAA	59.465	CCGAAGTGTTTTGTCTCATCC	59.583
TRINITY_DN21494_c3_g3_i3_gene=TRINITY_DN21494_c3_g3_len=1287	(TC)7	TGCCAGAAAGCACACAAAAG	60.027	AAACCTTCCTTCTCTCCCTTC	57.946
TRINITY_DN21510_c0_g1_i2_gene=TRINITY_DN21510_c0_g1_len=1790	(AC)7	GCCTTAAACCCCAAACTGAA	59.064	CCCATTTTCACTCATAACCCC	60.417
TRINITY_DN21514_c0_g1_i1_gene=TRINITY_DN21514_c0_g1_len=2574	(A)11	GCAATGGGCATCAGAAAAAT	59.907	TCCCAACTTTTCCTTCTTGC	59.288
TRINITY_DN21516_c1_g1_i2_gene=TRINITY_DN21516_c1_g1_len=986	(TTC)5	CATGCATCATTCCAAACTCG	60.073	TTGGAGGAGAAACCTGATGG	60.042
TRINITY_DN21523_c0_g1_i5_gene=TRINITY_DN21523_c0_g1_len=5602	(A)12	AATGGCGCATGCTAACTGTA	59.353	GTTCTCAGGGGTGAATGCTT	59.141
TRINITY_DN21537_c0_g1_i2_gene=TRINITY_DN21537_c0_g1_len=1644	(ATC)5	TCCACCAAGAACCTCTGTCA	59.23	ATGGGGAAGGCTAAGAAGGA	60.032
TRINITY_DN21538_c0_g1_i5_gene=TRINITY_DN21538_c0_g1_len=1280	(AT)7	AGCATGACTTCCATGCACAC	59.714	TGGATCCTCGCAGAGTTCTT	59.95
TRINITY_DN21555_c0_g1_i1_gene=TRINITY_DN21555_c0_g1_len=2471	(GA)8	GGTAATGAAAGTGGCCGAAA	59.938	TCATCGTCCACTCCCTCTCT	59.792
TRINITY_DN21558_c0_g1_i1_gene=TRINITY_DN21558_c0_g1_len=1365	(TC)6	AATGCCCTGAACCATCTTTG	59.933	TTGTAACAATAACAGATGAACCTGA	57.829
TRINITY_DN21564_c0_g1_i5_gene=TRINITY_DN21564_c0_g1_len=868	(A)10	GGAGAAGCCAACCCTACACA	60.111	GGTCCAAGTGGTTTGCTGTT	60.012
TRINITY_DN21574_c0_g1_i1_gene=TRINITY_DN21574_c0_g1_len=1404	(AAC)5	CCACATCACCTTCACCTCCT	59.962	GCTGTGGACAAGAATGCTGA	59.992
TRINITY_DN21576_c2_g13_i1_gene=TRINITY_DN21576_c2_g13_len=793	(ATG)6	ACGGATGCCCTTATCCTTCT	59.925	CACTCGGATCATCATTCCCT	59.886
TRINITY_DN21587_c0_g1_i9_gene=TRINITY_DN21587_c0_g1_len=1340	(T)10	AGCTGGTTTCTGCTGATCGT	60.02	GTGAGACACACCACCACCAC	59.889
TRINITY_DN21587_c0_g1_i9_gene=TRINITY_DN21587_c0_g1_len=1340	(T)12	AGCTGGTTTCTGCTGATCGT	60.02	GTGAGACACACCACCACCAC	59.889
TRINITY_DN21600_c0_g1_i5_gene=TRINITY_DN21600_c0_g1_len=2202	(ATTA)5	ACCAAACGCTGCAGAAAATC	60.257	ACAAGAACCCAATGAGGCAA	60.495
TRINITY_DN21608_c0_g1_i1_gene=TRINITY_DN21608_c0_g1_len=1939	(A)13	AATGCGGGCATACTCTCAAG	60.235	TGCATCCAGTGTCAAGAAGG	59.831
TRINITY_DN21609_c0_g1_i4_gene=TRINITY_DN21609_c0_g1_len=1728	(A)10	CAAAATCCAGGCAGATCGTT	60.074	GTTCATTCTTGCCGGAACTC	59.676
TRINITY_DN21613_c1_g1_i2_gene=TRINITY_DN21613_c1_g1_len=1272	(GAA)5	GCCCAATCATTGTATCCACC	60.021	AATCCCAACGTTGCAATCTG	60.894
TRINITY_DN21615_c0_g1_i1_gene=TRINITY_DN21615_c0_g1_len=951	(A)18	AAAATTGCAGCCAAAAGAAA	57.575	ACCAATGCTGGTAGAAAGCG	60.27
TRINITY_DN21627_c0_g1_i3_gene=TRINITY_DN21627_c0_g1_len=1531	(A)10	GGGCATGGTGCAAAGTATCT	59.962	TGCTTCTATTTTTCTATCGTTCTGG	60.149
TRINITY_DN21633_c0_g1_i12_gene=TRINITY_DN21633_c0_g1_len=2789	(T)10	GGACAATGGTCATGTGTGGA	60.23	GTTGGGATCTTGCGATTTGT	59.939
TRINITY_DN21634_c1_g1_i5_gene=TRINITY_DN21634_c1_g1_len=3373	(AC)8	TGAATAATAACCCCGGTCCA	60.009	GGCTTAAAGTGCGTCAGAGG	60.015
TRINITY_DN21638_c2_g1_i4_gene=TRINITY_DN21638_c2_g1_len=1088	(A)15	CTGAATTCCAAGACGCCATT	60.074	TGCATTGAAGAAAGGTTCCG	61.137
TRINITY_DN21640_c0_g1_i3_gene=TRINITY_DN21640_c0_g1_len=1898	(A)10	ACACAAGCCACGAATCAACA	60.16	GGCTTCCTTTACCAATGCAA	60.074
TRINITY_DN21649_c0_g1_i1_gene=TRINITY_DN21649_c0_g1_len=2652	(A)10	CCGTGAGTCCTAGGAAGTAAACA	59.698	CAGGGGAGAGGATAGTGTGC	59.679
TRINITY_DN21661_c0_g2_i1_gene=TRINITY_DN21661_c0_g2_len=254	(T)10	CACTCGCTTCATTCGGAACT	60.397	TCTGGGGAATAGGTTACTGCAT	59.856
TRINITY_DN21666_c0_g1_i2_gene=TRINITY_DN21666_c0_g1_len=1690	(TCAACC)5	CTTCCCCTTGTTCCTCCTCT	59.671	GGCACGATGAAGAATTTGGT	59.939
TRINITY_DN21669_c0_g1_i1_gene=TRINITY_DN21669_c0_g1_len=769	(GA)6	GGAGGATGGTGGAGATCAGA	60.008	AAACCCCAACATCATCAACC	59.508
TRINITY_DN21692_c0_g2_i2_gene=TRINITY_DN21692_c0_g2_len=460	(T)10	CCTATGCTCAATCTCGACCC	59.653	GGTAATACCAGGATGATTCTACCA	58.354
TRINITY_DN21705_c0_g2_i3_gene=TRINITY_DN21705_c0_g2_len=2034	(CATA)5	TCCAACAGTCCACCTCACAA	60.129	AAAAGGTCAATGTGGGTGCT	59.454
TRINITY_DN21712_c2_g3_i6_gene=TRINITY_DN21712_c2_g3_len=1544	(AG)7	TGAGTTGGCTTAACGGGACT	59.734	ACAACGTTTCTTCCAATGGC	59.978
TRINITY_DN21720_c0_g1_i1_gene=TRINITY_DN21720_c0_g1_len=1970	(T)10	CAACACCAAACTGCGAACTG	60.338	GCCGCTATCCGAGATTGATA	60.161
TRINITY_DN21720_c0_g1_i1_gene=TRINITY_DN21720_c0_g1_len=1970	(A)10	CCCCGAAACCATCAAAGTAA	59.795	TGGTAACCCAACAATGTCCA	59.667
TRINITY_DN21720_c0_g1_i1_gene=TRINITY_DN21720_c0_g1_len=1970	(A)11	GAAGATTATTCGGTGCCCTTT	59.455	ACTTCCCTCCATTCCCAAAT	59.629
TRINITY_DN21723_c0_g1_i1_gene=TRINITY_DN21723_c0_g1_len=727	(AG)7	CCCCACAAAAGGGTTTATGA	59.657	GACACAACCCCACCATTTTC	60.073
TRINITY_DN21723_c2_g1_i1_gene=TRINITY_DN21723_c2_g1_len=701	(AAG)10	CCATTAGCTTGATCAAAAGACG	58.899	TGATGCTGCACTTTTATGCC	59.839
TRINITY_DN21723_c4_g1_i1_gene=TRINITY_DN21723_c4_g1_len=601	(TG)6	GGCGACGGTGATATTCCTTA	59.923	TGCAAGTCTCATCCCAACTG	59.831
TRINITY_DN21724_c0_g1_i1_gene=TRINITY_DN21724_c0_g1_len=1212	(A)11	CATCATCATATGGGTTGAATCTG	59.172	AGAGAAGAACAATGGCACCG	60.255
TRINITY_DN21736_c0_g2_i1_gene=TRINITY_DN21736_c0_g2_len=1625	(AG)6	TGTCAAAAGGGTCACCAAAA	58.995	AAGGGGGCGAAATTTTGTAT	59.68
TRINITY_DN21738_c0_g1_i2_gene=TRINITY_DN21738_c0_g1_len=1104	(A)11	TACATTGGGCGCAGGAGTAT	60.49	CATATGCTTTGATGACAAAATGTTTA	59.396
TRINITY_DN21759_c0_g1_i1_gene=TRINITY_DN21759_c0_g1_len=2265	(TC)6	CGAGTTGCTTTGCTTTGTGA	60.172	CCCTTTTCCCTTTCTCTGCT	59.821
TRINITY_DN21761_c0_g3_i4_gene=TRINITY_DN21761_c0_g3_len=1450	(A)11	CAGCCAAACAGAAAAGGAAA	58	TCTGCATCTGGTGCCTACAG	60.008
TRINITY_DN21775_c1_g1_i12_gene=TRINITY_DN21775_c1_g1_len=4794	(TTG)5	CTTCTTCTTGGTGGAGGACG	59.837	ACTTTACCCCACAGCCACAC	59.891
TRINITY_DN21794_c0_g1_i3_gene=TRINITY_DN21794_c0_g1_len=3250	(A)12	TAGCAACCAACAGCAAACCA	60.293	GTGGGAGCGAGATAAAGCTG	59.978
TRINITY_DN21804_c0_g1_i1_gene=TRINITY_DN21804_c0_g1_len=2180	(T)10	GCGTGGAGTTGATTCATGTG	60.12	ATGACCATCCCTTTTTCCCT	59.629
TRINITY_DN21812_c0_g2_i1_gene=TRINITY_DN21812_c0_g2_len=1059	(AAC)5	GACGAAAGCCATCGCTAACT	59.481	AGTGGGCAGATAGAGCGTTG	60.419
TRINITY_DN21821_c0_g4_i1_gene=TRINITY_DN21821_c0_g4_len=573	(A)11	ATCCAGGCATCCACCTAACA	60.34	CAGGGTTAAATTTTCTCCGC	58.694
TRINITY_DN21823_c0_g1_i10_gene=TRINITY_DN21823_c0_g1_len=1971	(A)10	AGAAGCCACCACCAACAAAG	60.149	GCTAATGGCGCGTGAAAC	60.375
TRINITY_DN21828_c0_g1_i1_gene=TRINITY_DN21828_c0_g1_len=1350	(TCT)5	CTGAGGCGTAAATAGCGGAG	59.996	CGCGACAAAAGGAATCAAAT	60.074
TRINITY_DN21831_c0_g1_i1_gene=TRINITY_DN21831_c0_g1_len=879	(TCT)5	GGTTTCGAACTCTTGGCTCA	60.375	CGACGAGGGAAAACAATCTT	59.17
TRINITY_DN21834_c0_g3_i4_gene=TRINITY_DN21834_c0_g3_len=2797	(AG)7	AAGGTGGAAATGAAACATGGTC	60.096	ACATGACATAAGCGGCACAG	59.746
TRINITY_DN21840_c1_g2_i1_gene=TRINITY_DN21840_c1_g2_len=498	(A)10	CAAACAAACAATTCATTCTCGC	59.63	GGTTTTCAGGTTTAACGCCA	59.975
TRINITY_DN21867_c0_g1_i1_gene=TRINITY_DN21867_c0_g1_len=1903	(T)12	GGAATTCACCTCGTTCTTGC	59.676	CCAAACAAACAAACAAGCACA	59.659
TRINITY_DN21869_c1_g5_i1_gene=TRINITY_DN21869_c1_g5_len=301	(A)12	TGAAACTGGCAAATCAAAGTT	57.411	GCTGTCTTATTCTCTTTCATCGG	59.407
TRINITY_DN21870_c0_g1_i3_gene=TRINITY_DN21870_c0_g1_len=2724	(TA)6	TAGCCACACGGTGAACACTC	59.751	CAACCACCCCTTACCCTTTT	60.082
TRINITY_DN21884_c3_g1_i8_gene=TRINITY_DN21884_c3_g1_len=2859	(AGAA)5	GGACGAGGGTGAAAATGAAA	59.91	TCCACGTGCTACCTGAAAGA	59.44
TRINITY_DN21891_c0_g1_i4_gene=TRINITY_DN21891_c0_g1_len=509	(ATT)5	GGGGGAGGAACCAGATTATT	59.104	TTGGACATGCAGGTGTTGTT	60.008
TRINITY_DN21892_c0_g1_i1_gene=TRINITY_DN21892_c0_g1_len=1034	(A)10	CAATCAACACCGCACAAACT	59.615	CGGTTGAGATTGTGTAATGGAA	59.861
TRINITY_DN21898_c0_g1_i2_gene=TRINITY_DN21898_c0_g1_len=780	(T)11	GGTTGGTGGAGCAAGAAGAG	59.844	TGTCAACATGCCACAATCACT	60.024
TRINITY_DN21900_c0_g1_i1_gene=TRINITY_DN21900_c0_g1_len=1224	(A)10	AGTAACAGCCATGGCGAATC	60.103	CAATTCTCCCCCTCTTCCTC	60.008
TRINITY_DN21904_c1_g1_i8_gene=TRINITY_DN21904_c1_g1_len=1588	(A)10	ATGAGACCTCCAACTCGTGG	60.112	GTGGCCCAGTTTGTTGAACT	60.012
TRINITY_DN21927_c0_g1_i4_gene=TRINITY_DN21927_c0_g1_len=1073	(A)12	CAGCAGCATAGTGAAGCTGAG	58.989	TGTAGAATCTTGATATCTTATCCTTGC	58.456
TRINITY_DN21935_c0_g1_i1_gene=TRINITY_DN21935_c0_g1_len=809	(CA)6	ATCGCCATTCAAAAGTCACC	59.939	AGCCAGTTAAGGCAGCAGAA	60.154
TRINITY_DN21940_c0_g1_i8_gene=TRINITY_DN21940_c0_g1_len=2689	(AG)10	AGACCAAAAGCGAATCGAGA	59.955	TTCGCTACCTCATCCAAACC	60.074
TRINITY_DN21941_c0_g1_i1_gene=TRINITY_DN21941_c0_g1_len=1650	(A)11	GTTGTATTTACAAGCTCATTCATCA	57.502	CGCATGTCTACAAAGAGGCA	60.011
TRINITY_DN21945_c0_g2_i1_gene=TRINITY_DN21945_c0_g2_len=2466	(CTTT)5	AAACACAGGGGACAGAGTCG	60.151	TCGTGTTCTGATGCAGAGGT	59.42
TRINITY_DN21956_c0_g1_i5_gene=TRINITY_DN21956_c0_g1_len=2544	(CA)7	GACCCAAGCCTTCACCACTA	60.111	AGCCTTGAATCTTGCAGTCAG	59.63
TRINITY_DN21960_c0_g1_i2_gene=TRINITY_DN21960_c0_g1_len=2837	(A)12	ATTACCCAGCACCAAAAACG	59.861	TCGAATCCTCGTACCCAGAG	60.21
TRINITY_DN21961_c0_g1_i2_gene=TRINITY_DN21961_c0_g1_len=2437	(ATC)6	ACGAATGCGATTGATTGATG	59.504	TGAAAAAGATGCTGCTGGTG	59.988
TRINITY_DN21966_c0_g1_i12_gene=TRINITY_DN21966_c0_g1_len=4431	(A)11	AACATGGTGTTCCCCAGAAG	59.82	TGTGCAAGGCATTTTGGTTA	60.111
TRINITY_DN21966_c0_g1_i12_gene=TRINITY_DN21966_c0_g1_len=4431	(AGA)5	GAACATTGTTTCCGGGTTGT	59.694	CCTACTTCGCGTGACACTCA	60.049
TRINITY_DN21970_c0_g1_i4_gene=TRINITY_DN21970_c0_g1_len=1634	(TTA)5	CGAGAATTGAGATTGCGGTT	60.214	AGAACGATCTCCGTTCGCTA	59.978
TRINITY_DN21976_c0_g1_i2_gene=TRINITY_DN21976_c0_g1_len=1620	(CAC)5	CGATGTAGCTGACACAGGGA	59.855	TGCAACAACGACAACAACCT	60.199
TRINITY_DN21986_c0_g2_i1_gene=TRINITY_DN21986_c0_g2_len=997	(T)12	AATTTGAACGGTTGTGGCTC	59.978	CCAACAACCACATCATCACC	59.656
TRINITY_DN21988_c0_g1_i1_gene=TRINITY_DN21988_c0_g1_len=1152	(A)10	CTAAACCGAACCAAACGGAA	59.968	GAGAAGGAAACATCGAGGCA	60.34
TRINITY_DN21991_c0_g2_i1_gene=TRINITY_DN21991_c0_g2_len=661	(T)10	AAGAAAACCATGCCCTGTTG	59.971	TGATTCCAATATTCCATTTCAGG	60.029
TRINITY_DN22001_c1_g2_i2_gene=TRINITY_DN22001_c1_g2_len=2999	(TC)6	CCATCCCAATTCCAATTCAA	60.502	TTCAGCGTTGATTTTTGCTG	59.992
TRINITY_DN22004_c1_g1_i2_gene=TRINITY_DN22004_c1_g1_len=474	(A)11	TGATCCGACTTGAAACCAAA	59.097	AATCCCAAACCACCTCAACA	60.21
TRINITY_DN22012_c1_g6_i1_gene=TRINITY_DN22012_c1_g6_len=426	(T)10	GAAATCTCGGGAGGTTTTCA	59.101	AATTCGACCGTTCATTTTCG	59.938
TRINITY_DN22018_c0_g3_i1_gene=TRINITY_DN22018_c0_g3_len=1042	(T)14	AAAGCGGAAGCTAATTCACG	59.496	AGACAGACCGGTCCAAAATG	59.966
TRINITY_DN22021_c2_g2_i1_gene=TRINITY_DN22021_c2_g2_len=1368	(TGT)6	GGAAAATTCCAAAACCGACA	59.778	ATTGCTCCATCACCTTCGTC	60.081
TRINITY_DN22024_c0_g6_i1_gene=TRINITY_DN22024_c0_g6_len=254	(T)10	GGGTTCAAGATGAAAAATTGAGG	61.009	TGCTGCAACATTTTCAAACC	59.712
TRINITY_DN22034_c0_g2_i1_gene=TRINITY_DN22034_c0_g2_len=1215	(T)11	TGCAGCAAAACAAAACCAAC	59.752	TCACGCAACCTTGGTCACTA	60.301
TRINITY_DN22040_c1_g1_i1_gene=TRINITY_DN22040_c1_g1_len=315	(T)10	GGCTTCTCCACCTTTCATCA	60.195	TCACTCCAATGTCCACCAAA	59.935
TRINITY_DN22045_c2_g2_i5_gene=TRINITY_DN22045_c2_g2_len=2495	(T)12	CGGGTTCATTCGTGATTCAT	60.723	AATGTTCTTCCCATTACGCA	58.093
TRINITY_DN22048_c2_g1_i10_gene=TRINITY_DN22048_c2_g1_len=2868	(TCC)6	ACCTCTGAACCATGAGGTGG	59.962	TGGAGGTGGAGGAAGAAGTG	60.229
TRINITY_DN22048_c2_g1_i10_gene=TRINITY_DN22048_c2_g1_len=2868	(A)12	GCAACTGTGAAGGAAGCACA	60.032	TCCTCTTGATTTTCGTTCGG	60.184
TRINITY_DN22049_c0_g1_i1_gene=TRINITY_DN22049_c0_g1_len=872	(A)12	CTAGGCCCAAAAATGACCAA	59.931	TTTGCCATCGAAAAGGAGAT	59.645
TRINITY_DN22076_c0_g1_i4_gene=TRINITY_DN22076_c0_g1_len=517	(T)13	AAACTCACCGATCCATCAGC	60.081	TTTTCACGATACCCACACGA	59.964
TRINITY_DN22100_c1_g3_i2_gene=TRINITY_DN22100_c1_g3_len=703	(ATA)5	TCACCAAACCTAATGCACTCA	59.184	GCAGCGCCCTATATCACTTC	59.835
TRINITY_DN22100_c1_g4_i1_gene=TRINITY_DN22100_c1_g4_len=1261	(AC)6	TGAGCACAGATCTCATTCGC	60.104	GCGTGTACATATCACAGCCG	60.165
TRINITY_DN22102_c1_g1_i2_gene=TRINITY_DN22102_c1_g1_len=1349	(GGA)18	GCTCGGTTCTCTCCCATACA	60.218	ATTACGCCTGCACCATCAAT	60.361
TRINITY_DN22102_c2_g2_i4_gene=TRINITY_DN22102_c2_g2_len=1635	(GGT)5	AGGGTGGACCATAACACGAG	59.844	ACCTCAACAACCACCCTCAC	59.859
TRINITY_DN22102_c2_g2_i4_gene=TRINITY_DN22102_c2_g2_len=1635	(AGG)7	ATCAACTTCAAGGCGCAAAG	60.386	CGTGTTATGGTCCACCCTTC	60.232
TRINITY_DN22102_c2_g4_i1_gene=TRINITY_DN22102_c2_g4_len=383	(CCA)5	ACCTCAACAACCACCCTCAC	59.859	AGGGTGGACCATAACACGAG	59.844
TRINITY_DN22109_c0_g2_i3_gene=TRINITY_DN22109_c0_g2_len=2031	(AGG)5	CCATCTTGTTCACCCTTGCT	60.111	GTGAGAACCGATAAGCCTGC	59.843
TRINITY_DN22111_c0_g2_i1_gene=TRINITY_DN22111_c0_g2_len=2503	(GTG)5	GAAACGGAGTCGGAGATCAG	59.803	TCATATAAAGCCCGTTTGGC	59.928
TRINITY_DN22120_c0_g1_i3_gene=TRINITY_DN22120_c0_g1_len=1803	(A)13	TCAACAAAGCATCCGATTCA	60.197	TGGGCTTTCCATGGTATGAT	60.155
TRINITY_DN22130_c0_g1_i1_gene=TRINITY_DN22130_c0_g1_len=776	(T)10	GCTCCATCACTAACTCTCATAAACA	58.902	CAAGTGGATTTTGGAATGGC	60.309
TRINITY_DN22136_c0_g1_i2_gene=TRINITY_DN22136_c0_g1_len=2010	(GAT)5	CAGCAGAATGTTGGGAGGAT	60.073	TTTTGAAGGTTTTGGCTGCT	59.861
TRINITY_DN22137_c0_g1_i1_gene=TRINITY_DN22137_c0_g1_len=1493	(A)10	TCACTCAACCCTTGTGGAAA	59.109	ATATAAGCTGGGATGGCGTG	59.945
TRINITY_DN22140_c0_g1_i2_gene=TRINITY_DN22140_c0_g1_len=2579	(A)10	CAGATGACAAATGGTTACAAGAATG	59.821	GTCCTGGGTTTTGTCAAGGA	59.943
TRINITY_DN22140_c0_g1_i2_gene=TRINITY_DN22140_c0_g1_len=2579	(A)11	GCAGTTCCCCATGCTTAGAA	60.214	CAAAAAGGTGGTGGTTGTTG	58.92
TRINITY_DN22146_c1_g2_i4_gene=TRINITY_DN22146_c1_g2_len=2284	(A)10	AAACCAAAAACCAGAACCCA	59.308	CCACATTCTTCACCCACCTT	59.82
TRINITY_DN22147_c0_g5_i1_gene=TRINITY_DN22147_c0_g5_len=257	(A)10	CCACCAATTCAACATTTATTCA	57.431	CAACGTCGTGGTTTGTATGC	60.035
TRINITY_DN22148_c0_g7_i1_gene=TRINITY_DN22148_c0_g7_len=317	(A)10	CTAACCATCTCTGCTTCGCC	59.978	ATGTCACGGGCTTCCTAATG	59.955
TRINITY_DN22148_c1_g1_i1_gene=TRINITY_DN22148_c1_g1_len=394	(T)13	ACTGCTACTCTTGCCCGAAA	60.015	GTCATGTGATCCAATGCGTC	59.933
TRINITY_DN22157_c0_g2_i1_gene=TRINITY_DN22157_c0_g2_len=587	(AG)6	CCCATTGAGGATTGGCTAGA	60.029	CACCTGCACATGAAGTGGAC	60.162
TRINITY_DN22171_c0_g1_i11_gene=TRINITY_DN22171_c0_g1_len=2182	(AT)10	CAAGCTCAGCAGTTCCATCA	60.136	ATCTATTCGCCCGGAAGTTT	59.93
TRINITY_DN22186_c0_g1_i2_gene=TRINITY_DN22186_c0_g1_len=689	(ACC)5	AGAGTCACCATAACCACCGC	59.997	ACTCTGACACCCAAGCAACC	60.159
TRINITY_DN22206_c0_g1_i1_gene=TRINITY_DN22206_c0_g1_len=1135	(AT)6	GCCTCTGAACTGCAAGGCTA	60.678	TGCCATTTCAGTGTTGGAAA	60.088
TRINITY_DN22207_c0_g2_i3_gene=TRINITY_DN22207_c0_g2_len=1480	(GCATTT)6	AAGGAAGTTGCATGGGATTG	59.933	TTCCAAATGGCTACCTGACC	59.933
TRINITY_DN22208_c2_g3_i2_gene=TRINITY_DN22208_c2_g3_len=2269	(A)10	GGATGGCCAATTGTTGAGAT	59.756	TTCATGACTGGCACATGGTT	59.967
TRINITY_DN22209_c0_g2_i2_gene=TRINITY_DN22209_c0_g2_len=2148	(A)10	GTGGGACGTGGCTACTTGAT	59.997	GGTGACTTTTCTCGATTTGGA	59.16
TRINITY_DN22212_c0_g1_i1_gene=TRINITY_DN22212_c0_g1_len=941	(A)10	GGCGCCAGAAAGTTTTTCTAC	60.25	GGTTGATCTAAGCAGACGCC	59.843
TRINITY_DN22212_c0_g1_i1_gene=TRINITY_DN22212_c0_g1_len=941	(GT)7	TGATCAGAGAGCGGGAAACT	59.95	TCACATCCCCTATTTGCTCC	59.894
TRINITY_DN22214_c0_g1_i2_gene=TRINITY_DN22214_c0_g1_len=1254	(A)12	GTTACCAAACAATCCGTCCG	60.227	CCCTCCCCCATTTTTATTTT	59.034
TRINITY_DN22230_c0_g1_i2_gene=TRINITY_DN22230_c0_g1_len=970	(T)10	TAGCAGTGATCGGACGACAG	60.008	TGCAGTTACCAAAGAAACCAAA	59.663
TRINITY_DN22232_c0_g2_i1_gene=TRINITY_DN22232_c0_g2_len=1761	(A)13	CAGAGAATCCCAGATTGACCA	60.058	CTTCACGGGTTGTGTTCGTA	59.609
TRINITY_DN22232_c0_g2_i1_gene=TRINITY_DN22232_c0_g2_len=1761	(A)10	TACCACCATGTGCATTGCTT	59.995	CTTCCCCTCCTCTCCAAACT	59.671
TRINITY_DN22232_c0_g2_i1_gene=TRINITY_DN22232_c0_g2_len=1761	(A)11	TGCCTCCACTAAACCAACCT	59.592	AGCAATGCACATGGTGGTAA	59.995
TRINITY_DN22238_c0_g1_i1_gene=TRINITY_DN22238_c0_g1_len=1170	(A)11	CATTTCCCCTCTCACAATCC	59.336	GTGTCTGTGTCCGAGCTTCA	60.03
TRINITY_DN22238_c0_g1_i1_gene=TRINITY_DN22238_c0_g1_len=1170	(A)12	CCAAATACCCTAACGCACAGA	60.004	TCTCAGCTTCTCAGCCCTGT	60.284
TRINITY_DN22239_c0_g2_i3_gene=TRINITY_DN22239_c0_g2_len=1008	(T)15	TCATTTGGATCATTTTCAGCC	59.893	TGTTGAAGACCTATTGGCCC	59.933
TRINITY_DN22250_c0_g1_i1_gene=TRINITY_DN22250_c0_g1_len=951	(TC)6	ACAAGGGAGAACGATTGGTG	59.966	GTCACCACTATCGGCACCTT	59.997
TRINITY_DN22250_c0_g8_i2_gene=TRINITY_DN22250_c0_g8_len=1187	(T)12	CAGATCGAGGGGAAATTTGA	60.006	AAGCTGAAACTTGGAATTGGA	58.823
TRINITY_DN22250_c0_g8_i2_gene=TRINITY_DN22250_c0_g8_len=1187	(AG)6	GTCACCACTATCGGCACCTT	59.997	ACAAGGGAGAACGATTGGTG	59.966
TRINITY_DN22251_c1_g5_i1_gene=TRINITY_DN22251_c1_g5_len=736	(A)10	CATGTCAATCCACAATCTCTTCA	59.985	GTGTCATTGAGTGTCGGTGC	60.171
TRINITY_DN22253_c2_g1_i1_gene=TRINITY_DN22253_c2_g1_len=626	(A)10	GGGACGATGAAGAAGCAGAG	59.95	ACCTACTCCCTCCGGTCACT	59.991
TRINITY_DN22253_c3_g1_i6_gene=TRINITY_DN22253_c3_g1_len=2119	(A)12	AGAGAACGCGACGGAAGTAA	60.015	TCATTCATCGTTCATCGCTC	59.763
TRINITY_DN22253_c3_g1_i6_gene=TRINITY_DN22253_c3_g1_len=2119	(GAA)5	GAGCGATGAACGATGAATGA	59.763	CATTACCGCATCCTCTCCAT	59.917
TRINITY_DN22253_c4_g3_i2_gene=TRINITY_DN22253_c4_g3_len=681	(GA)9	CTGTGTTAACCGCTTGCTGA	60.05	TCTGCGATAGCGGAAATAGC	60.465
TRINITY_DN22256_c0_g1_i1_gene=TRINITY_DN22256_c0_g1_len=239	(A)10	AAACCATCTGGAAAGTCAGTGAA	60.026	TTTTTCCTTGCTGTTTTGGG	60.081
TRINITY_DN22263_c0_g1_i1_gene=TRINITY_DN22263_c0_g1_len=1762	(A)10	CCATTTTCAGAGTGAGATAGAAATCA	60.026	GGGTCACAGGTTCGTTCTGT	60.009
TRINITY_DN22274_c0_g1_i4_gene=TRINITY_DN22274_c0_g1_len=1461	(A)11	TCCTGCATTTTATGTTTTCTCA	57.459	TGTCATCCCACTATGCTCCA	60.072
TRINITY_DN22291_c0_g4_i3_gene=TRINITY_DN22291_c0_g4_len=1655	(ATT)5	GTGAGACTTTTGTGTGGGGG	60.399	ACACCAAGATTCGTGTCCCT	59.43
TRINITY_DN22295_c0_g1_i1_gene=TRINITY_DN22295_c0_g1_len=1195	(A)13	CCAAAAAGTGGTTTACAGCAA	57.878	GGGTTTGTCTGTTTCGAGGA	60.088
TRINITY_DN22296_c0_g1_i1_gene=TRINITY_DN22296_c0_g1_len=1755	(CT)12	TGAGGAGAGAAAGAAGTGAGAAA	57.478	TGACCCTTTGATTGGTTTGAG	59.956
TRINITY_DN22296_c1_g1_i2_gene=TRINITY_DN22296_c1_g1_len=2394	(A)10	TGGTAATCAAGTGCGGTAACA	59.097	CCAAAACGATTCCGTCTCAA	61.001
TRINITY_DN22305_c0_g2_i1_gene=TRINITY_DN22305_c0_g2_len=414	(T)15	TGTAAGGATTCCAAACACATATCAA	59.672	CAATCATCATGGCCACACTC	59.925
TRINITY_DN22311_c0_g2_i1_gene=TRINITY_DN22311_c0_g2_len=1674	(A)10	TAACCATTTGGGTCCGGATA	60.009	TGCCAACCTGACTGACTGAC	59.872
TRINITY_DN22314_c0_g1_i3_gene=TRINITY_DN22314_c0_g1_len=1031	(T)10	GTCACCGGCGTAATTCAGTT	60	TCCATCCACTGTTCTTCTTTCA	59.711
TRINITY_DN22318_c1_g1_i1_gene=TRINITY_DN22318_c1_g1_len=1091	(AG)12	GGAAGATGGGTTTTGGAGGT	60.169	CCAACTGTTGTGGCTGACTC	59.31
TRINITY_DN22319_c1_g3_i1_gene=TRINITY_DN22319_c1_g3_len=208	(A)10	TCCATGGCCATTTATAATTTCA	59.177	TTGTAATGGCCTTGTTTGGA	59.013
TRINITY_DN22331_c0_g1_i1_gene=TRINITY_DN22331_c0_g1_len=1584	(A)10	CATTGTCAGCAGCATCAACA	59.409	TGGGTTTGTGTTTGATTTGA	57.415
TRINITY_DN22339_c0_g1_i6_gene=TRINITY_DN22339_c0_g1_len=2286	(TTC)6	CCTCAAAATCAGCAGCATCA	59.948	CGCCGCGTCATAATAAGAAT	60.082
TRINITY_DN22342_c0_g1_i3_gene=TRINITY_DN22342_c0_g1_len=1776	(TGT)6	TGCGTGGTAGAAAGCAAGAA	59.609	AGCTGCCGCATCTTATCTGT	60.007
TRINITY_DN22344_c3_g1_i4_gene=TRINITY_DN22344_c3_g1_len=6037	(CAG)6	CATTATCAAGGCCGGTGTTT	59.823	GTGCCTGGTTTTCATCCTGT	59.973
TRINITY_DN22347_c0_g1_i7_gene=TRINITY_DN22347_c0_g1_len=2200	(A)10	GCAATGCGCCAAAAACTAAT	60.102	AAAAATGCGAAGCAGAGTCA	58.651
TRINITY_DN22348_c1_g2_i1_gene=TRINITY_DN22348_c1_g2_len=295	(AAT)5	AAGCAAAGACAGCAAGCACA	59.788	CCTCTCCTTCTTTAATCTATAAACCC	58.395
TRINITY_DN22348_c2_g1_i4_gene=TRINITY_DN22348_c2_g1_len=2109	(CAT)5	GGAGAGGGTTTCATCAGGGT	60.314	AGCAGCTTCAGGTACAATCCA	59.89
TRINITY_DN22353_c0_g1_i4_gene=TRINITY_DN22353_c0_g1_len=1010	(T)11	ATTTCGGCACAGACTAGCGA	60.934	GATTGCATTGATGCGCTATG	60.209
TRINITY_DN22369_c1_g2_i2_gene=TRINITY_DN22369_c1_g2_len=2571	(A)10	TCCCGCGATATGATTTTACA	58.983	GCGGTAGATCAAAGGAAACTG	58.847
TRINITY_DN22376_c0_g1_i3_gene=TRINITY_DN22376_c0_g1_len=1097	(TA)8	TGATTCCCACACAAACACTTG	59.45	AACGGTTGTCGAGGTTTCAC	60.012
TRINITY_DN22389_c0_g1_i1_gene=TRINITY_DN22389_c0_g1_len=1183	(A)10	TAAGAGTCCCACCCCACTTG	59.959	GCGTCGGAGTTGTCTTCTTC	59.997
TRINITY_DN22393_c0_g3_i8_gene=TRINITY_DN22393_c0_g3_len=3794	(CAT)7	TCCAAATCTCGAGGAACACC	60.05	AGGCAATGCGAGAAAGAAAA	59.96
TRINITY_DN22394_c4_g2_i2_gene=TRINITY_DN22394_c4_g2_len=805	(A)10	CGACATGAGATTTAGGGGGA	59.887	CAAAACTTGATTAGAATAATTGCTATG	57.023
TRINITY_DN22400_c0_g1_i4_gene=TRINITY_DN22400_c0_g1_len=2620	(T)15	TGGACAGATCCAGTCATCCA	60.046	AGGACACTGGAGTAGACCGC	59.33
TRINITY_DN22405_c2_g3_i5_gene=TRINITY_DN22405_c2_g3_len=755	(G)13	GGAGAAAAGAACAGAGAGGGG	59.309	TAGATAGCGGCGACGAGATT	59.967
TRINITY_DN22408_c0_g2_i3_gene=TRINITY_DN22408_c0_g2_len=1059	(A)10	TCCACCATACACGATGCAAT	59.805	GGTCGGATCGATAATTGGAA	59.722
TRINITY_DN22412_c2_g1_i2_gene=TRINITY_DN22412_c2_g1_len=1771	(T)10	TGGTGGGTTCTTTGACAACA	59.976	ATCCAGCGTGGAAACTTTGA	60.636
TRINITY_DN22429_c1_g2_i7_gene=TRINITY_DN22429_c1_g2_len=1822	(A)11	GCAAGTTCTCGTCGTTGTGA	60.032	AAAACTTTCGCTCCCAACCT	60.11
TRINITY_DN22435_c0_g1_i7_gene=TRINITY_DN22435_c0_g1_len=1237	(GAT)6	TCACTTCCTTGGAAGAGCGT	59.989	TGGAACGGAGTGAGAGACAA	59.388
TRINITY_DN22436_c1_g1_i1_gene=TRINITY_DN22436_c1_g1_len=217	(A)10	AGTTCAGGATCTAAGGGCCG	60.59	GATTGAATGGCCAGATTTCG	60.414
TRINITY_DN22436_c3_g5_i1_gene=TRINITY_DN22436_c3_g5_len=507	(A)11	TAACCGATTCAGCCAACTCC	60.074	GGAGAATTGCCGAGAGAGTG	59.95
TRINITY_DN22436_c3_g7_i1_gene=TRINITY_DN22436_c3_g7_len=1427	(A)11	CGAAACACAGAAGATCGCAA	59.988	GGACAAAACGAGGCATTTGT	59.978
TRINITY_DN22440_c0_g1_i1_gene=TRINITY_DN22440_c0_g1_len=1400	(GAT)5	TCCCAACAAGTCCAGTGACA	60.129	TGAAGCACCCTATTCATTCCT	58.659
TRINITY_DN22453_c0_g1_i5_gene=TRINITY_DN22453_c0_g1_len=2502	(AG)7	GGAATCGGAAAACGAACCTT	60.299	CCCTCTCCCCAATTTTTCTC	59.875
TRINITY_DN22455_c0_g1_i1_gene=TRINITY_DN22455_c0_g1_len=705	(A)10	AACCTAGCATGGACAATCGG	59.955	TGTATGGAAAGATTGGGGGA	60.126
TRINITY_DN22455_c0_g1_i1_gene=TRINITY_DN22455_c0_g1_len=705	(A)10	CCTGCGGACAGAAGAAGAAC	59.989	CCGATTGTCCATGCTAGGTT	59.955
TRINITY_DN22466_c0_g1_i5_gene=TRINITY_DN22466_c0_g1_len=2460	(AGA)5	ATCGGACGGTTCGTGTTTAG	59.993	TTCCATACACCGCCACTACA	59.988
TRINITY_DN22469_c1_g2_i4_gene=TRINITY_DN22469_c1_g2_len=1969	(ATCT)6	TCATCTTGGTGAAACCGACA	60.088	CTGACTGCACTCACGAGCAT	60.211
TRINITY_DN22469_c1_g3_i1_gene=TRINITY_DN22469_c1_g3_len=276	(TAGA)5	GCTTGTTCCTTGTAAAACCAAA	58.347	CAAATGGCCGAAGAAGCTAA	60.335
TRINITY_DN22472_c0_g1_i1_gene=TRINITY_DN22472_c0_g1_len=1516	(A)11	ATAATGGGCACCCATGAAAA	60.016	CCGCATTTCATCCAAAGATT	59.901
TRINITY_DN22472_c0_g1_i1_gene=TRINITY_DN22472_c0_g1_len=1516	(CTC)6	TCGCTTGATGGATTGAGTTG	59.799	TGAACTTGCGATGTTGAAGC	59.995
TRINITY_DN22473_c0_g2_i1_gene=TRINITY_DN22473_c0_g2_len=695	(AAT)6	AACATAAGAGTAACAGGTGCCACA	59.989	GGGAATCTGCTAGTTATTTGATTGA	59.892
TRINITY_DN22477_c2_g2_i1_gene=TRINITY_DN22477_c2_g2_len=1050	(T)17	TATGCCCCCATTTGGATAGA	60.11	TGGCATATGATGATGAGTCG	58.009
TRINITY_DN22477_c2_g6_i1_gene=TRINITY_DN22477_c2_g6_len=1170	(AG)7	GGCACCCATTGAATAGATCG	60.296	TTCCTTCCTTCCTTCCTCGT	60.183
TRINITY_DN22479_c1_g3_i1_gene=TRINITY_DN22479_c1_g3_len=379	(A)11	GGTACACCGCCAGTGAGTCT	60.182	TCCTCCTTCCCGTATGAATG	59.887
TRINITY_DN22500_c0_g1_i1_gene=TRINITY_DN22500_c0_g1_len=229	(CATT)5	TGCCTGTCAAAACCATGAGA	60.24	TGTTTGAATTTTGGATGATTGTG	59.728
TRINITY_DN22509_c1_g2_i1_gene=TRINITY_DN22509_c1_g2_len=1424	(A)18	TCCGAGACGTTAACGCAACT	60.827	GCCACAATAGTGGTGCTGTG	60.183
TRINITY_DN22510_c3_g1_i7_gene=TRINITY_DN22510_c3_g1_len=3184	(CAA)8	AAGCAAGCAAACACACCAAA	59.366	GAACAATATGGCGGAAGTTGA	59.952
TRINITY_DN22510_c3_g1_i7_gene=TRINITY_DN22510_c3_g1_len=3184	(A)11	ATGGATCAACTTCCGCCATA	60.296	GTTCGGATCAGCGTTTCAAT	60.081
TRINITY_DN22513_c1_g1_i3_gene=TRINITY_DN22513_c1_g1_len=1869	(A)10	AAACGTCAGTTGATGAGGGG	59.966	CAGATGAGAATAGGAAATGTGTGAA	59.552
TRINITY_DN22514_c3_g1_i3_gene=TRINITY_DN22514_c3_g1_len=2904	(A)10	CCCTTCATCTTCACCGACTG	60.646	GGCTGTCTTTCAGGTTTTGC	59.859
TRINITY_DN22514_c3_g2_i1_gene=TRINITY_DN22514_c3_g2_len=638	(T)10	AGTAGGGTTTTGGGGGCTTA	59.829	GAAGGGAGGGTTTCCAAAAA	60.271
TRINITY_DN22516_c1_g1_i5_gene=TRINITY_DN22516_c1_g1_len=1066	(GA)7	CAAAGGGAGAGTGCGAAGAC	59.989	ACAAATTGCCAAACACCACA	59.864
TRINITY_DN22527_c0_g1_i11_gene=TRINITY_DN22527_c0_g1_len=2093	(T)10	TGGTTGGAATGAAAATGAGGA	60.294	CACTTCAAAAGGCGGAGGTA	60.241
TRINITY_DN22530_c0_g2_i1_gene=TRINITY_DN22530_c0_g2_len=465	(A)14	GATTTTCACGGAAAACGGAT	58.882	TGCCAGTCCTGGGTAACTTT	59.592
TRINITY_DN22549_c0_g3_i1_gene=TRINITY_DN22549_c0_g3_len=630	(AG)8	AAAGGATCAGCGAAGGGAAT	60.039	AACCATCTCCTTCTTCGTTTAGG	60.011
TRINITY_DN22549_c1_g2_i2_gene=TRINITY_DN22549_c1_g2_len=377	(AG)8	CAATGAAGCAAAAACAAAGAAAGA	59.817	CTTAGGCAACGAGTGGTGGT	60.171
TRINITY_DN22551_c0_g1_i2_gene=TRINITY_DN22551_c0_g1_len=848	(T)10	CGGATTATCATCTGGCCATT	59.745	TCACTGACCCCTCGAAGTTT	59.697
TRINITY_DN22556_c1_g1_i11_gene=TRINITY_DN22556_c1_g1_len=2772	(AG)22	AATCGTACGGGTCAGAAACG	59.993	CGTTTCCACTTAATACGCCG	60.5
TRINITY_DN22559_c0_g1_i1_gene=TRINITY_DN22559_c0_g1_len=266	(TTG)7	TGTCAGATCCAAGAACAGAGAAA	58.969	TGTGAATGTAATGGACCCCA	59.623
TRINITY_DN22561_c0_g1_i13_gene=TRINITY_DN22561_c0_g1_len=1999	(A)14	TGGCTTTGACTCTTTCAGCA	59.716	AAGGGAAGAATGTTGGGGTT	59.668
TRINITY_DN22563_c1_g1_i8_gene=TRINITY_DN22563_c1_g1_len=937	(T)11	CCATTCTTCTTTCTGTCGCA	58.999	TCGCTAGCATTACAAGCCCT	60.003
TRINITY_DN22570_c0_g1_i1_gene=TRINITY_DN22570_c0_g1_len=1404	(A)12	CCCCATTTCCGATTCCTAAT	59.978	AACATCCCTTGGCTGTGTTC	59.973
TRINITY_DN22570_c1_g3_i1_gene=TRINITY_DN22570_c1_g3_len=757	(CA)6	CAATCCTTCCTCCAACATCC	59.336	TTGTGATCTTTGCTTTCACTTG	58.081
TRINITY_DN22570_c2_g1_i10_gene=TRINITY_DN22570_c2_g1_len=2263	(GA)11	CGGTGGAGGATTGAATTGAT	59.75	CGATTCTCGTTCCGTTTCTT	59.312
TRINITY_DN22573_c0_g3_i1_gene=TRINITY_DN22573_c0_g3_len=710	(A)14	TATCTGTGAGCCCGAAAACC	60.074	TCGTGGATTAGATGGAATGCT	59.542
TRINITY_DN22575_c5_g1_i1_gene=TRINITY_DN22575_c5_g1_len=872	(A)10	ATAAATCCCACCGGCATACA	60.038	GGCGGTGGACTAGACTAGCTT	59.921
TRINITY_DN22595_c0_g1_i2_gene=TRINITY_DN22595_c0_g1_len=1140	(A)14	CCAAGAAACAAAATCAAACCC	58.454	GGAACACTTGTGTTTAGGGGA	58.945
TRINITY_DN22600_c0_g1_i2_gene=TRINITY_DN22600_c0_g1_len=772	(AG)7	CAATGGAACCACGAAGACCT	59.966	TGTAGAAAGACCGTCGCACA	60.449
TRINITY_DN22606_c0_g1_i1_gene=TRINITY_DN22606_c0_g1_len=963	(CT)11	GGGATTCATCCACCAGAAAA	59.727	TTTCCAGAATGTGTGAAGAATGA	59.601
TRINITY_DN22607_c2_g2_i1_gene=TRINITY_DN22607_c2_g2_len=1927	(CAT)5	TCAACCTCGGAGTCCTCATC	60.199	TCTTTTGAGGCTGCTGGTCT	60.134
TRINITY_DN22609_c0_g1_i1_gene=TRINITY_DN22609_c0_g1_len=289	(A)14	CGACCCATGATCTCATTTGC	61.423	TCAATTGATGCGTTTGTGCT	60.265
TRINITY_DN22609_c1_g1_i1_gene=TRINITY_DN22609_c1_g1_len=1521	(A)10	TGGAAAATTATACCAAAGGGGA	59.562	TGTTGGGGTTTTGTTGTTGA	59.834
TRINITY_DN22616_c0_g1_i5_gene=TRINITY_DN22616_c0_g1_len=1991	(A)11	TCTTCCCCTAAGCCAATCCT	60.032	GGCCCTTCTTCACCAATGTA	59.933
TRINITY_DN22617_c0_g1_i1_gene=TRINITY_DN22617_c0_g1_len=473	(A)20	ATCGAGATTCGATTCCATGC	60.005	CAAATCCATAAGCTACAGGTTCA	58.335
TRINITY_DN22617_c2_g1_i2_gene=TRINITY_DN22617_c2_g1_len=1709	(A)10	CTATCGGCGAAGAGATTTGC	59.945	GAAGATAGAAGGATCTAGAAATCAGCA	59.824
TRINITY_DN22617_c2_g1_i2_gene=TRINITY_DN22617_c2_g1_len=1709	(A)12	TCCGGCAAATGCAAATTAGT	60.456	GTGGGATCAAAGAAGGTGGA	59.903
TRINITY_DN22621_c0_g1_i1_gene=TRINITY_DN22621_c0_g1_len=1939	(A)15	CCCTTGTCCAATTCCAAGAA	59.903	GGCTTGTTGTTGAGGGAGAG	59.844
TRINITY_DN22621_c0_g1_i1_gene=TRINITY_DN22621_c0_g1_len=1939	(A)12	TGCAAAAGGAAAAACTGGAAA	59.723	CTAGTCTTCGCAATAGCGGC	60.138
TRINITY_DN22633_c0_g2_i8_gene=TRINITY_DN22633_c0_g2_len=3462	(TC)6	CTTGCGGTGCATGTAATACG	60.155	CTCGCTAACACCAACCCAGT	60.171
TRINITY_DN22633_c0_g2_i8_gene=TRINITY_DN22633_c0_g2_len=3462	(TA)7	GCTCAATGCTTAAGCCCAGT	59.481	ATGCAGCAGGTTTATTTGGG	59.96
TRINITY_DN22635_c0_g2_i1_gene=TRINITY_DN22635_c0_g2_len=719	(A)10	AACGAACTGGTGGTGGAAAG	60.005	CGACAACACTGCCTCAACAT	59.751
TRINITY_DN22642_c0_g1_i1_gene=TRINITY_DN22642_c0_g1_len=258	(AG)9	CACTCCAACAGCCTTGTCCT	60.298	TCACTTCCTCAAACAACCTCAA	59.751
TRINITY_DN22642_c1_g3_i4_gene=TRINITY_DN22642_c1_g3_len=1448	(ATG)5	AAGCTCAGGGTTCACCAATG	60.111	CGATTACCAGGAAGAACGGA	60.066
TRINITY_DN22643_c0_g3_i5_gene=TRINITY_DN22643_c0_g3_len=2113	(T)10	TGAGGTTTCTGGACCACCAC	60.966	GCCCCTAAAGTATTGCCACA	59.96
TRINITY_DN22646_c0_g1_i2_gene=TRINITY_DN22646_c0_g1_len=985	(A)14	GCTGTTGCTTCCTCAATTTCA	60.38	GCCTCTTTCGTTTCCGACTA	59.452
TRINITY_DN22647_c0_g1_i2_gene=TRINITY_DN22647_c0_g1_len=2027	(T)10	GGTCAAGTAATCCAGTGACCG	59.463	AAAAGATGAACGCCAACCAC	59.978
TRINITY_DN22648_c0_g3_i1_gene=TRINITY_DN22648_c0_g3_len=1656	(T)10	GGGTGGGACATATTTGACTTC	58.227	GGTTGCTTCTGGAAAAAGAAAA	59.752
TRINITY_DN22656_c0_g1_i3_gene=TRINITY_DN22656_c0_g1_len=2107	(A)10	GTCCATACGGGCTACACGTT	59.882	GCTGGTTCAGGAGGAAAACA	60.232
TRINITY_DN2266_c0_g1_i1_gene=TRINITY_DN2266_c0_g1_len=958	(TTG)5	GTTGTTGATCGCGAGTCTGA	59.992	TCAAACAAAGGTCCCAAAGG	59.942
TRINITY_DN22665_c0_g3_i2_gene=TRINITY_DN22665_c0_g3_len=1214	(A)11	AAAACAGTAAGCAGTAGAAAAATCAAA	58.302	AAGTGGGTGGAATGGGAGAT	60.575
TRINITY_DN22669_c0_g1_i7_gene=TRINITY_DN22669_c0_g1_len=2202	(AG)7	TGCGTGAATATGACGAAATGA	60.088	AGCTCAATTCAAATCACCGC	60.221
TRINITY_DN22675_c0_g1_i4_gene=TRINITY_DN22675_c0_g1_len=1738	(A)10	AATCCAGTTAACGTGCTCGC	60.278	TCTAATTTTGGAGCATGGGC	60.038
TRINITY_DN22677_c4_g1_i2_gene=TRINITY_DN22677_c4_g1_len=638	(A)10	AACCGGGAAGAAACAACAAA	59.448	TTTGGGTTAAATCGGAAGGA	59.383
TRINITY_DN22681_c1_g4_i1_gene=TRINITY_DN22681_c1_g4_len=615	(A)10	CTTTTGCTTCCCCTGTTTTG	59.719	ATTTGATGGTACCCTGAGCG	59.955
TRINITY_DN22687_c1_g2_i4_gene=TRINITY_DN22687_c1_g2_len=1729	(A)11	CGCGCCTCTTTCTCTGATAC	60.118	AAAGGTGCAAATAAAGGGCAT	59.857
TRINITY_DN22695_c0_g1_i6_gene=TRINITY_DN22695_c0_g1_len=1219	(ACC)6	GCCAACATACACCGTGACAA	60.436	GTGGTTTTTCAAACCGTGG	58.859
TRINITY_DN22696_c0_g2_i1_gene=TRINITY_DN22696_c0_g2_len=353	(GTT)7	GCTTTTGCTGACACAAATATGG	59.652	CTTCCTCTCTGCATCGTGTG	59.571
TRINITY_DN22697_c0_g4_i1_gene=TRINITY_DN22697_c0_g4_len=1688	(A)10	CAAGAAGACTGTCGCACCAA	60.025	GAGTGGACTTTCCGAACTGC	59.851
TRINITY_DN22699_c0_g1_i1_gene=TRINITY_DN22699_c0_g1_len=1716	(A)11	ATTTGCCCATATCCTGTTGC	59.791	TGTTGTTTGGGTTGTGGCTA	60.004
TRINITY_DN227_c0_g1_i2_gene=TRINITY_DN227_c0_g1_len=340	(CT)6	CCCCAAATAACCAATTCTCC	58.226	GCCTGGGCCTTATGATACAA	59.923
TRINITY_DN22705_c1_g1_i2_gene=TRINITY_DN22705_c1_g1_len=1603	(A)11	GCGTTTTGAAATTCTAGGTGC	58.891	TGTTCTTCATGTTTTTCTCTCTTTTG	60.187
TRINITY_DN22705_c2_g5_i2_gene=TRINITY_DN22705_c2_g5_len=587	(GA)6	CCCCCTCCCTTAATCTGTGT	60.183	CAAAACGAGAAACGCTCTCC	59.993
TRINITY_DN22712_c2_g2_i1_gene=TRINITY_DN22712_c2_g2_len=1853	(A)10	TATTCTGGCCAAGCACAAAG	58.917	AACAAGCAATCCTTACCCCA	59.429
TRINITY_DN22716_c0_g1_i1_gene=TRINITY_DN22716_c0_g1_len=2555	(AG)11	AATCGGAACAATCGAAGGG	59.879	TATCTTTGTCCCGGTCCTTG	59.926
TRINITY_DN22716_c0_g1_i1_gene=TRINITY_DN22716_c0_g1_len=2555	(ACA)5	CACACCGAACACTCTGGTTG	60.194	CCCTTCGATTGTTCCGATT	59.879
TRINITY_DN22723_c1_g1_i4_gene=TRINITY_DN22723_c1_g1_len=1358	(A)13	TGACAGACATGCACTCCAAA	58.784	TTGGCCTTAACGTTTGGTTC	59.975
TRINITY_DN22725_c1_g1_i1_gene=TRINITY_DN22725_c1_g1_len=1663	(TGA)7	GAATGATTGGGCGAAAAGAA	60.016	CGAACGAAGGTGTTCCCTAA	60.103
TRINITY_DN22725_c3_g1_i3_gene=TRINITY_DN22725_c3_g1_len=2594	(GA)22	GGTGTTCCATGAGGAGAGGA	60.048	CACTTTCTTCAAACACCACTTCA	59.314
TRINITY_DN22726_c0_g1_i5_gene=TRINITY_DN22726_c0_g1_len=1146	(A)11	CTGACATCCAACCAATCATCA	59.358	CCTCCTGCTCAAGCCTTAAA	59.587
TRINITY_DN22732_c0_g1_i1_gene=TRINITY_DN22732_c0_g1_len=702	(GA)8	ACAACCACGACCCTGAACTC	60.009	TAGCATTTGGAATACCCACG	58.506
TRINITY_DN22732_c0_g2_i3_gene=TRINITY_DN22732_c0_g2_len=1125	(TC)8	CGGTGACAAGTGGCAAGTATT	60.045	ACAACCACGACCCTGAACTC	60.009
TRINITY_DN22734_c1_g2_i5_gene=TRINITY_DN22734_c1_g2_len=790	(CAT)6	AGATGTTTGAGGAGCTCGGA	59.95	TGGATGGAAAAAGTAACACCAA	59.357
TRINITY_DN22736_c0_g1_i1_gene=TRINITY_DN22736_c0_g1_len=801	(A)11	CCGAAGAATCATGTGAAAGTCA	60.11	AAAAGAAACCCTACTCGGGC	59.593
TRINITY_DN22737_c0_g2_i4_gene=TRINITY_DN22737_c0_g2_len=1609	(TC)8	TGAAAAGGGTTTGCTGTTGA	59.293	TCTAAATTTTCATGCGCCAA	59.286
TRINITY_DN22738_c0_g1_i1_gene=TRINITY_DN22738_c0_g1_len=1005	(A)11	CAACATAAGACCCAGCGTGA	59.716	GCCGGAGAAGGATGTTGTTA	60.074
TRINITY_DN22742_c0_g1_i5_gene=TRINITY_DN22742_c0_g1_len=1537	(A)12	CCAACATGCGAGTCACAATC	60.12	GCCTCGAATCAAATCTCTGC	59.923
TRINITY_DN22749_c0_g1_i7_gene=TRINITY_DN22749_c0_g1_len=2026	(A)10	AGCATGCAATTTTGGAAAGG	60.074	CATCCTATGCTTGTGGAGCA	59.823
TRINITY_DN22774_c1_g1_i2_gene=TRINITY_DN22774_c1_g1_len=1890	(AAC)5	CATAGCATCAGCCGTCGTTA	59.856	GTTCCCCCTTTCTCGTTCTC	60.052
TRINITY_DN22774_c1_g2_i1_gene=TRINITY_DN22774_c1_g2_len=664	(A)10	GGATCAAACAGCTTTAACAAATCA	59.561	CATTTTGCATTCGTGTACGG	59.992
TRINITY_DN22784_c0_g1_i9_gene=TRINITY_DN22784_c0_g1_len=1935	(A)13	CTCAGTTGCAAATCAGGCAA	59.988	TGAATTTGATTCCCCATTCC	59.558
TRINITY_DN22784_c0_g1_i9_gene=TRINITY_DN22784_c0_g1_len=1935	(TCA)5	TCAACAGCATGCACAAATGA	59.833	CGAATGGTGATGACGATGAC	59.925
TRINITY_DN22785_c0_g1_i1_gene=TRINITY_DN22785_c0_g1_len=2052	(A)10	AAAGAACCGCAAACAAAAGG	59.244	GTTAGGCGTGAACAATGGCT	60.14
TRINITY_DN22808_c0_g3_i1_gene=TRINITY_DN22808_c0_g3_len=884	(A)10	CATTCATCCATCAACTATACCAAAA	59.203	ATTATTGACGGGAATGGTGC	59.651
TRINITY_DN22817_c0_g4_i3_gene=TRINITY_DN22817_c0_g4_len=660	(A)10	TGCATTAAACTCCATAGTTCCAA	58.687	TGCCAATTTCCTCTGTTTCC	60.051
TRINITY_DN22827_c1_g1_i1_gene=TRINITY_DN22827_c1_g1_len=679	(T)11	TGCCCAAAACTGGTAGACCT	59.592	TGGAAGGGTTGTTTATTGGC	59.801
TRINITY_DN22831_c0_g1_i8_gene=TRINITY_DN22831_c0_g1_len=3282	(A)10	AATCCATAAACAAATTTATCCTTGA	57.293	TGAGCAGCATCTTCTGTTGG	60.136
TRINITY_DN22832_c0_g1_i6_gene=TRINITY_DN22832_c0_g1_len=3103	(A)13	CACCTTTCTCCCTTTGATTAAATTAT	59.303	TGTGGTTTCGGGTCGTAACT	60.41
TRINITY_DN22833_c0_g1_i9_gene=TRINITY_DN22833_c0_g1_len=4261	(TAA)7	CCATCCAGATTCCAGATCCA	60.828	GACCCCATCTAGTGGGACAA	59.779
TRINITY_DN22841_c1_g1_i3_gene=TRINITY_DN22841_c1_g1_len=1794	(A)11	CATTATGCTGGGAAGTGGCT	60.096	CAAGTGGAGAATCCCTTTGG	59.521
TRINITY_DN22842_c0_g1_i1_gene=TRINITY_DN22842_c0_g1_len=1928	(A)12	CAGCATTGGAATGCAACAGT	59.722	AGCTAGCCTTTTGTGGCTTG	59.654
TRINITY_DN22844_c2_g2_i1_gene=TRINITY_DN22844_c2_g2_len=3168	(AG)7	CATCCTTTGGCCAGGATTTA	59.894	GTCAAAGCTCGGGAATGGTA	60.074
TRINITY_DN22844_c3_g1_i2_gene=TRINITY_DN22844_c3_g1_len=1804	(GA)9	AGAGTTGCCGGAGAGTGAAA	59.989	AAAACAGAACGTAGGCGTGG	60.168
TRINITY_DN22844_c4_g1_i1_gene=TRINITY_DN22844_c4_g1_len=366	(GA)9	GCCACTTTACACGCATCCTT	60.14	TGTATTCTTCCTATCATCCCTTATTTT	58.903
TRINITY_DN22860_c0_g2_i1_gene=TRINITY_DN22860_c0_g2_len=1661	(T)14	TAGCGAAATTTGGGGTTTTT	58.606	TTCATCGCAAAGCAAATGAG	59.953
TRINITY_DN22863_c0_g3_i2_gene=TRINITY_DN22863_c0_g3_len=839	(T)10	TCAAAACTCCACATTTTCACCA	60.378	CGTCTTTTGGAGCAATTTCC	59.685
TRINITY_DN22868_c0_g2_i1_gene=TRINITY_DN22868_c0_g2_len=1485	(T)10	ATCAACATCCAACCCCAAAA	60.029	CATTAAACACGAGGCACGTC	59.199
TRINITY_DN22868_c3_g5_i3_gene=TRINITY_DN22868_c3_g5_len=1323	(A)13	ATCCCAAGTCCAAGAAGCAA	59.67	GGAGAACACAAGTTGGTGGAA	59.997
TRINITY_DN22870_c0_g1_i1_gene=TRINITY_DN22870_c0_g1_len=911	(GA)6	CACCATCCTCAAGCATCAAG	59.241	TTTACGATCGCTCACACTCG	60.011
TRINITY_DN22870_c2_g3_i2_gene=TRINITY_DN22870_c2_g3_len=612	(CCA)5	CCATATCCACCATCTCCACC	60.011	ATGAGAGATGCCATTGAGGG	60.034
TRINITY_DN22870_c2_g3_i2_gene=TRINITY_DN22870_c2_g3_len=612	(CCA)6	CCGATCGTTTATACACAACCAA	59.758	CAATGACGGTGGTTATTCCC	60.051
TRINITY_DN22875_c2_g5_i1_gene=TRINITY_DN22875_c2_g5_len=502	(A)13	CCCTGAAGTCCTCCATTTCA	60.042	TCCGCATATGCAGGTAGCTT	60.762
TRINITY_DN22875_c2_g6_i1_gene=TRINITY_DN22875_c2_g6_len=997	(A)12	ATCACGGTGCATTGATGTGT	59.845	ATAGGTGCCTCTTTGGGCTT	60.096
TRINITY_DN22885_c1_g1_i1_gene=TRINITY_DN22885_c1_g1_len=2756	(T)17	CGAAGAAGGGAGAGAAACCC	60.183	TTCATTACAAGCACACCACCA	60.019
TRINITY_DN22885_c2_g3_i1_gene=TRINITY_DN22885_c2_g3_len=1141	(ATC)5	CAGCTCAGGCCATACCTCTC	59.973	TCTCTGCCATCATCAATCCA	60.161
TRINITY_DN22885_c2_g3_i1_gene=TRINITY_DN22885_c2_g3_len=1141	(T)14	TGATGGCAGAGAATGACGAC	59.794	TTTGAATAGAAAAACCCAACCA	58.518
TRINITY_DN22887_c0_g3_i1_gene=TRINITY_DN22887_c0_g3_len=555	(A)11	TCCCCCAAATTTTTGTTTTG	59.649	TTGGGAAGTGGGTTTTTGAG	59.942
TRINITY_DN22893_c0_g1_i3_gene=TRINITY_DN22893_c0_g1_len=1176	(T)10	AGTTAGGCCATCACCCAGC	60.088	GCCATTGTTGCTGAGATTGA	59.805
TRINITY_DN22894_c0_g1_i1_gene=TRINITY_DN22894_c0_g1_len=267	(TG)7	ATGCCTATGCCATTTGAAGC	60.067	ACCTGCAGCCAGATGAAAAT	59.7
TRINITY_DN22895_c0_g1_i1_gene=TRINITY_DN22895_c0_g1_len=2674	(ATC)5	TCTCTTCCTCTTCCGACCAA	59.92	AAGAGCGGAGGAGTTGTTGA	59.989
TRINITY_DN22903_c0_g2_i1_gene=TRINITY_DN22903_c0_g2_len=1530	(T)13	GAACCGAAATCGGAAACTGA	60.051	CACCGCACAACAAATGCTTA	60.698
TRINITY_DN22904_c2_g2_i2_gene=TRINITY_DN22904_c2_g2_len=1590	(GAATT)5	TGGGGGAAACCATGAATCTA	60.126	ATCGCTGTTCGTCTTTTCCA	60.776
TRINITY_DN22908_c0_g1_i2_gene=TRINITY_DN22908_c0_g1_len=1124	(A)11	TCATAGCCAACCACATACAAGAA	59.527	GCTCCAAAATGTTATGTGTGAGTC	59.94
TRINITY_DN22909_c0_g3_i3_gene=TRINITY_DN22909_c0_g3_len=1318	(A)11	AGGAATCCCACATGACAAGG	59.779	TTTCGATATTCCATGCTTTCG	60.047
TRINITY_DN22915_c0_g1_i2_gene=TRINITY_DN22915_c0_g1_len=1998	(TTA)7	CCTGAAAGTGAAAGAGGATCAGA	59.872	GGCGTGTGTTTGTTCTCTCC	60.7
TRINITY_DN22915_c0_g1_i2_gene=TRINITY_DN22915_c0_g1_len=1998	(A)13	GAAGCAAAACGACAACGACA	59.888	TCTGATCCTCTTTCACTTTCAGG	59.872
TRINITY_DN22915_c0_g2_i1_gene=TRINITY_DN22915_c0_g2_len=225	(T)10	GCGTATGTTTGTTCTCTCCG	58.379	ACACGATGGCCAAGTGTAAG	58.65
TRINITY_DN22916_c0_g2_i2_gene=TRINITY_DN22916_c0_g2_len=760	(TAAT)5	GCAAAACCTACATGGAGAAGG	58.707	TGATAATTAGGCGTGGTGGA	58.991
TRINITY_DN22918_c0_g1_i7_gene=TRINITY_DN22918_c0_g1_len=1396	(TC)6	AACCATACTGACCCTGCACC	59.851	TGAGGCGATGATAAAGTGGA	59.226
TRINITY_DN22921_c0_g1_i2_gene=TRINITY_DN22921_c0_g1_len=1642	(TCT)5	AACCTCCCATGCTTCAGAAA	59.67	TGGTTTTGTTTTCTCCGAGG	60.081
TRINITY_DN22922_c0_g2_i2_gene=TRINITY_DN22922_c0_g2_len=2326	(TAC)5	CTTCCACTTCCACTGCCACT	60.298	AAGAGCAAAGGAGGGTCGAT	60.212
TRINITY_DN22929_c0_g6_i1_gene=TRINITY_DN22929_c0_g6_len=362	(A)10	GTTTAGCCACAGGAGGCAAC	59.74	TTCCTTCTTTCCTCTTCTTTCG	59.13
TRINITY_DN22930_c0_g1_i1_gene=TRINITY_DN22930_c0_g1_len=681	(A)12	CCCACTATTGCACCGCTATT	59.982	ATCCATTGCTCTGCATGTGA	60.233
TRINITY_DN22932_c0_g1_i2_gene=TRINITY_DN22932_c0_g1_len=2182	(A)12	CTTACCTCGCAGCCAAACTC	60.015	GCAATGCTCTGGTTACTCCG	60.796
TRINITY_DN22952_c0_g1_i8_gene=TRINITY_DN22952_c0_g1_len=1777	(A)10	GATGCAACTTTCCCCATCAG	60.461	AAGGGTGGGTACTGGGTAGG	60.103
TRINITY_DN22952_c0_g1_i8_gene=TRINITY_DN22952_c0_g1_len=1777	(TAC)5	TAACTCTAGGGCGAGGACGA	59.971	CAAAAGAACACAACAGTGTAGGAGA	59.776
TRINITY_DN22959_c0_g1_i4_gene=TRINITY_DN22959_c0_g1_len=3584	(T)19	TCGCTAAAGGGTCTGCATCT	59.978	TCAAACGCTACCGCTCTCTT	60.154
TRINITY_DN22966_c0_g2_i5_gene=TRINITY_DN22966_c0_g2_len=1125	(A)10	TGAATTGCATCTTCATTTGGA	59.101	GCCGATTGATTTGTAATTGGA	59.787
TRINITY_DN22967_c2_g1_i5_gene=TRINITY_DN22967_c2_g1_len=923	(GAT)5	AAATCAAAATTCCGGCTCCT	59.909	GCGATCTTCAGCAACACGTA	60.019
TRINITY_DN22967_c2_g2_i1_gene=TRINITY_DN22967_c2_g2_len=967	(GAT)8	AACTCAGCACAACCTGGTCC	60.159	AATACGTATCCCCTGCTCCC	60.173
TRINITY_DN22982_c0_g1_i1_gene=TRINITY_DN22982_c0_g1_len=2996	(TGG)7	GAGGAAGAGGAGGAGGGAGA	59.883	TCCAATGAAACGAAACCACA	59.941
TRINITY_DN22983_c2_g3_i2_gene=TRINITY_DN22983_c2_g3_len=586	(T)14	GGGTCGGAGTTTGAGTTTGA	60.088	TAGAGAACCCACCTCCGAAA	59.665
TRINITY_DN22987_c0_g1_i1_gene=TRINITY_DN22987_c0_g1_len=1838	(A)10	GCCTCCTGGCTGTAAAGTTG	59.875	GGGGTGTGTCTTGAATGCTT	59.973
TRINITY_DN23007_c0_g1_i4_gene=TRINITY_DN23007_c0_g1_len=1582	(TTAT)6	AAGGTGGTGATGGCAAGTTC	59.973	CACTTAGTCAGGTAAAGAGGAGCA	59.151
TRINITY_DN23008_c0_g3_i1_gene=TRINITY_DN23008_c0_g3_len=651	(A)12	AATCTGGCGTTATCTGGGATT	59.812	ACAGGTCATCATAGCGGGTC	59.957
TRINITY_DN23014_c0_g1_i8_gene=TRINITY_DN23014_c0_g1_len=2728	(AC)6	CGATGGTGTCTGAATTGGTG	59.96	GTTGATACAGCGGGTGAGGT	59.997
TRINITY_DN23015_c0_g1_i3_gene=TRINITY_DN23015_c0_g1_len=1399	(A)11	ACGCAAGCAGAACCAGAGAT	60.02	TCGCTGTTAGTTTGTGTGCC	59.911
TRINITY_DN23024_c1_g2_i1_gene=TRINITY_DN23024_c1_g2_len=1515	(A)12	CTCCTCACCACACCCAAGAT	59.962	AAAAGTTCATGACAACGTGTGG	59.936
TRINITY_DN23028_c0_g2_i5_gene=TRINITY_DN23028_c0_g2_len=2514	(GAA)5	GCACATGCTCAGCAAAAAGA	60.142	TGCGATGAGGATTGTGAAAA	60.197
TRINITY_DN23038_c0_g1_i3_gene=TRINITY_DN23038_c0_g1_len=2090	(A)10	CCTTTCACTTCGTTTCCCTG	59.705	AGTGGGATGGCCACTATTTG	59.813
TRINITY_DN23039_c2_g1_i1_gene=TRINITY_DN23039_c2_g1_len=1474	(T)10	TGCTTCACAGAAACATGATGG	59.707	TTATTCAGACAGCAAGGCCC	60.214
TRINITY_DN23039_c3_g1_i6_gene=TRINITY_DN23039_c3_g1_len=1773	(AG)7	GGGTTGATTTGAAGAAGTGGA	59.017	TTCCCTTTTCTTTCTTGCCC	60.534
TRINITY_DN23039_c3_g1_i6_gene=TRINITY_DN23039_c3_g1_len=1773	(AAAATC)6	TGAAGAGAAGCAGAGGTGGAG	59.73	TTGCACAAGTGGTTTCTAGGG	60.154
TRINITY_DN23039_c3_g1_i6_gene=TRINITY_DN23039_c3_g1_len=1773	(A)10	TGCAGTCCATTTTGTTGCTC	59.847	CTCCACCTCTGCTTCTCTTCA	59.73
TRINITY_DN23039_c3_g2_i2_gene=TRINITY_DN23039_c3_g2_len=1403	(TCC)6	CTTGCAATCAGCATCACACC	60.272	GAAGCGACGAAAACGAAGAG	60.132
TRINITY_DN23042_c0_g1_i8_gene=TRINITY_DN23042_c0_g1_len=1741	(A)12	TGACCAAGGGAATTGAAAAA	58.039	TTCTGCTGTGATTCCTGGTG	59.831
TRINITY_DN23065_c1_g1_i2_gene=TRINITY_DN23065_c1_g1_len=683	(A)10	AACCCTAAAAGCCGCACATA	59.609	TTCATCGGCAGTCCGTTTAT	60.469
TRINITY_DN23071_c5_g1_i1_gene=TRINITY_DN23071_c5_g1_len=678	(A)10	TCAAGTTGGGGAGAAAAAGG	59.143	CACCCCTCACTTTGCTCATT	60.111
TRINITY_DN23071_c6_g1_i2_gene=TRINITY_DN23071_c6_g1_len=1880	(A)12	GTGCTGCATCGAATCCCTAT	60.066	CACCCTCTTCTACTCCCGGT	60.502
TRINITY_DN23071_c6_g2_i1_gene=TRINITY_DN23071_c6_g2_len=1988	(T)10	AGAGATAATTGGGGATGGGG	59.974	TTTTAAACCTTGAGACATGCCA	59.625
TRINITY_DN23071_c6_g2_i1_gene=TRINITY_DN23071_c6_g2_len=1988	(AGC)6	GATGCTGTTGCTGATGCTGT	60.024	CCTGCCACGGATCATCTATT	59.917
TRINITY_DN23074_c1_g10_i1_gene=TRINITY_DN23074_c1_g10_len=540	(GCT)6	CTCACTCCCATTAGGGACCA	59.92	CGAATCTCCTTGTGCTCTCTC	59.176
TRINITY_DN23074_c1_g2_i1_gene=TRINITY_DN23074_c1_g2_len=352	(CT)9	GCTCGATATCAGACCCGACT	59.268	GCGATACTGAGATGTAGCAGAGAA	60.068
TRINITY_DN23074_c1_g9_i3_gene=TRINITY_DN23074_c1_g9_len=1752	(AGTG)5	AGAAATGTCAGAAGGGCACG	60.255	ACTCTCACACCCCATTCCAC	59.817
TRINITY_DN23074_c1_g9_i3_gene=TRINITY_DN23074_c1_g9_len=1752	(A)11	TCAAAGACCCCACTTCAATG	58.541	CGTGCCCTTCTGACATTTCT	60.255
TRINITY_DN23075_c3_g2_i1_gene=TRINITY_DN23075_c3_g2_len=221	(A)14	TCCATGATGAGAGCCTCAAA	59.322	TTCAAGCATTCAATTCTCACAAA	59.75
TRINITY_DN23083_c0_g1_i1_gene=TRINITY_DN23083_c0_g1_len=2067	(A)12	ATGCCCCACTATGCAAAAAG	59.96	TGTCATGGTTTGATGGTTGC	60.376
TRINITY_DN23090_c0_g1_i1_gene=TRINITY_DN23090_c0_g1_len=1994	(T)12	GGAAAATAGGTGGTGGGGAT	59.881	TGAACACAACGTTCTAAAAGTCC	58.351
TRINITY_DN23095_c0_g1_i10_gene=TRINITY_DN23095_c0_g1_len=4101	(AGA)6	ACAACACCACCCCTCAGAAG	60.002	CCCTTTCCCTTCTTTTCTCG	60.172
TRINITY_DN23095_c0_g1_i10_gene=TRINITY_DN23095_c0_g1_len=4101	(T)13	ACAACACCACCCCTCAGAAG	60.002	GAATGCAAAGCAAAGCAGC	59.709
TRINITY_DN23106_c0_g1_i1_gene=TRINITY_DN23106_c0_g1_len=3659	(TGC)6	AGGAGAAGAAGCCCAAGGAG	59.95	CCAAAGTCCCCAATGAAGAA	59.903
TRINITY_DN23110_c0_g1_i3_gene=TRINITY_DN23110_c0_g1_len=1923	(AC)7	ATGTTACACGGAAGCCCAAC	59.859	CAGCAAGGGTGTGAATGAGA	59.831
TRINITY_DN23119_c1_g5_i1_gene=TRINITY_DN23119_c1_g5_len=1678	(T)11	CGATTTTTGAGGGAGGATGT	58.981	TGTTTATCAATTTTCCCACGG	59.685
TRINITY_DN23121_c4_g2_i1_gene=TRINITY_DN23121_c4_g2_len=701	(T)15	GCGTCGACACATGCTAAAAA	59.879	TTTGCAGGTACCAAGTCGAA	59.317
TRINITY_DN23125_c2_g1_i7_gene=TRINITY_DN23125_c2_g1_len=1377	(A)13	TGGGTTCACCAAAAATCCTC	59.767	GCAGAAAAAGTGTGGAAGGAA	59.345
TRINITY_DN23125_c3_g1_i3_gene=TRINITY_DN23125_c3_g1_len=1552	(A)15	CCAAACCAAATCCACAATCC	60.029	TGGGTTTGTGCAGACTTTGA	60.278
TRINITY_DN23129_c2_g3_i1_gene=TRINITY_DN23129_c2_g3_len=275	(T)10	CCGCCTCATTTTATCTCCAA	60.031	TGAACACAAATCTCTTGCATCC	60.118
TRINITY_DN23130_c0_g1_i3_gene=TRINITY_DN23130_c0_g1_len=1043	(T)12	CCGGGAGAAAGAAAGCAATA	59.292	CCGTAACCAATAAAAGGCGA	59.958
TRINITY_DN23131_c0_g3_i1_gene=TRINITY_DN23131_c0_g3_len=551	(A)10	ACCCAACATTTCACACAGCA	60.008	CCCTCCTTCATTTCTCTCACC	60.059
TRINITY_DN23131_c0_g5_i3_gene=TRINITY_DN23131_c0_g5_len=2185	(GA)8	CCGGAAAACGAAACAGAAGA	60.22	ACCTAAAGACCGTTTGCACC	59.101
TRINITY_DN23131_c0_g5_i3_gene=TRINITY_DN23131_c0_g5_len=2185	(CAG)5	GGCAAAACAGACCGACTCTC	59.851	GCAATCAGCTTGCTGTACCA	60.019
TRINITY_DN23131_c1_g1_i1_gene=TRINITY_DN23131_c1_g1_len=692	(TC)8	AGCAGCAACCTGCCATATCT	59.866	TTGACGGTGAACATGGAGTT	58.984
TRINITY_DN23138_c0_g1_i1_gene=TRINITY_DN23138_c0_g1_len=1747	(T)10	CCACCCATTACCCACACTTT	59.569	GTCGGTGGTGCAAAGCTACT	60.321
TRINITY_DN23140_c0_g1_i1_gene=TRINITY_DN23140_c0_g1_len=1097	(A)10	CAGTATGGTTTAAGCCGTTTCA	59.184	CCAAACTAGGGTTTTTGGCA	59.968
TRINITY_DN23140_c0_g1_i1_gene=TRINITY_DN23140_c0_g1_len=1097	(GAT)8	GACCCTTTGGGAAACCGTAT	60.053	TGATATCCACCGCATCTTCA	60.033
TRINITY_DN23140_c0_g1_i1_gene=TRINITY_DN23140_c0_g1_len=1097	(A)10	GGATTCAAAGGCAAACGGTA	59.938	TGTGGATGTGGATTCGATTG	60.33
TRINITY_DN23140_c2_g3_i1_gene=TRINITY_DN23140_c2_g3_len=670	(GAT)6	ACAAGCTCGGCAAAATCTTC	59.457	CACAAGAAAAATGAGCAAGGG	59.733
TRINITY_DN23140_c2_g3_i1_gene=TRINITY_DN23140_c2_g3_len=670	(GA)12	TGCATCTCTTGCTTTTCCAA	59.542	TGACAATATTCACACACACATTCA	58.873
TRINITY_DN23145_c2_g3_i1_gene=TRINITY_DN23145_c2_g3_len=622	(GAA)5	CCCGAAAAATTTCGAGAAGA	59.269	TGACGGATCTAGGGTTCCAG	60.065
TRINITY_DN23148_c1_g2_i2_gene=TRINITY_DN23148_c1_g2_len=1860	(TCA)7	TCACAGAAAATCCACCCACA	59.935	GGCATCAAGCAAGAAAGATGA	60.346
TRINITY_DN23151_c0_g2_i1_gene=TRINITY_DN23151_c0_g2_len=881	(A)11	GATCCTTGTTCAAGTTGGGC	59.532	TTTCAAGCACTTTTGAGCCA	59.585
TRINITY_DN23163_c2_g3_i1_gene=TRINITY_DN23163_c2_g3_len=501	(AAAT)5	GGCGATAATCTTCATTGGTGA	59.915	AGCACAGCCACTTCATAATGTT	58.794
TRINITY_DN23166_c0_g1_i8_gene=TRINITY_DN23166_c0_g1_len=2507	(T)14	GTTGAAGCGGTGAAAGAAGC	60	TGAACAACCAACATGGAAACA	59.849
TRINITY_DN23183_c0_g1_i1_gene=TRINITY_DN23183_c0_g1_len=1877	(A)12	GGGCATGAGGAAAATACAACA	59.815	AGCAGCAGAAGCCGATAGAA	60.257
TRINITY_DN23183_c0_g1_i1_gene=TRINITY_DN23183_c0_g1_len=1877	(GA)7	TGCTTCTCAATTTTCCTGGG	60.184	TCCGTTGTTGCATCTTCTTCT	59.867
TRINITY_DN23184_c0_g1_i1_gene=TRINITY_DN23184_c0_g1_len=1681	(A)13	TCCCACATCCAAAACAACCT	60.21	CCAAAAAGAGATGCTCTCCG	59.948
TRINITY_DN23188_c0_g2_i12_gene=TRINITY_DN23188_c0_g2_len=2466	(GT)9	GAAGTTGAACGCAAAACCCT	59.218	TGATTCTTTGCTTTCTTCACCA	59.861
TRINITY_DN23188_c0_g2_i12_gene=TRINITY_DN23188_c0_g2_len=2466	(AG)8	GGTGTGTGTGTGTGTGTGTGA	59.989	CTTCCTATTCATCCCCGACA	59.887
TRINITY_DN23193_c2_g2_i1_gene=TRINITY_DN23193_c2_g2_len=434	(TTC)6	CTCCCCTTTCTCTGGGTCTT	59.671	AATGGCTGTTTATCCCGAAT	58.394
TRINITY_DN23196_c0_g1_i10_gene=TRINITY_DN23196_c0_g1_len=1966	(A)11	TCATGGATTCAACTCCGTCC	60.871	GGGATCATGCCACTCTTGTT	59.934
TRINITY_DN23202_c0_g1_i3_gene=TRINITY_DN23202_c0_g1_len=708	(AG)7	CCGATCACCTAGGGATTTCA	59.887	GGAGGAAATCAATCTTCTTTTATTCTT	59.806
TRINITY_DN23205_c0_g7_i1_gene=TRINITY_DN23205_c0_g7_len=1633	(GTG)6	GTGTGTTTTATGGGAGCGGT	59.859	CAACAATGGGCGAAGCTATT	60.096
TRINITY_DN23207_c0_g1_i1_gene=TRINITY_DN23207_c0_g1_len=1522	(GA)8	GGTAGTGGTGGAAGGAGCAA	60.111	CTATGAACCCCGGTGTGG	59.755
TRINITY_DN23216_c0_g1_i2_gene=TRINITY_DN23216_c0_g1_len=673	(TC)14	CCCCCAAAACTCACAGAAAA	59.942	CTTGTTTCAGTTGGGGCATT	59.971
TRINITY_DN23217_c0_g1_i1_gene=TRINITY_DN23217_c0_g1_len=1673	(ATT)18	CCCTCTTTGTGAGATGAGCC	59.803	GGGTCCTGTGAGAGGAATCA	60.048
TRINITY_DN23218_c0_g3_i11_gene=TRINITY_DN23218_c0_g3_len=967	(A)10	CGCTGGTAGTGGAAGTGTGA	59.897	ACACGTGGGTTCCTATCAGC	59.997
TRINITY_DN23228_c0_g1_i3_gene=TRINITY_DN23228_c0_g1_len=790	(A)10	ATGCAACAATCATCGCCATA	59.921	TCCCTCGTACTGTAATCGCC	60.096
TRINITY_DN23228_c0_g1_i3_gene=TRINITY_DN23228_c0_g1_len=790	(A)11	TCACAGACATATTCAATTCTTCCC	59.376	TATGGCGATGATTGTTGCAT	59.921
TRINITY_DN23233_c0_g1_i2_gene=TRINITY_DN23233_c0_g1_len=1522	(A)13	CCCTCCCCTTCCTTACAAAG	59.927	GGTCCAAGTTTCATGTCCTCA	59.958
TRINITY_DN23233_c0_g1_i2_gene=TRINITY_DN23233_c0_g1_len=1522	(GAA)5	GGCTAGTGTTCCTGAGGCTG	60.012	AGGATTGGAGTTGGCAAAAA	59.546
TRINITY_DN23233_c0_g1_i2_gene=TRINITY_DN23233_c0_g1_len=1522	(TGT)5	TCTCGGTCGGAGTCTTCACT	59.986	CGCGTTAATAATGTCGCTGA	59.864
TRINITY_DN23234_c1_g3_i1_gene=TRINITY_DN23234_c1_g3_len=338	(A)13	GCAATAGTGGCAAAATGCAA	59.708	TTGTCAATGGTCTTGCCAAC	59.547
TRINITY_DN23237_c0_g2_i1_gene=TRINITY_DN23237_c0_g2_len=761	(T)11	CCTGAATTTTGGGAGCAAAC	59.546	GCCGACATGAAATAAAAGACA	57.767
TRINITY_DN23237_c1_g2_i3_gene=TRINITY_DN23237_c1_g2_len=1786	(T)11	TGACACGGCTTACTTTGATTTT	58.811	CCGTGTCAAACGGAGTTATTT	59.007
TRINITY_DN23237_c1_g4_i3_gene=TRINITY_DN23237_c1_g4_len=927	(GA)11	AGTTGCTGGCAGAAAAGACC	59.478	CGACATTCCTTCATAAATTTTACA	57.391
TRINITY_DN23239_c1_g2_i2_gene=TRINITY_DN23239_c1_g2_len=3426	(A)10	CCAAGTGCGAGTCATCTTCA	59.984	TTGCATTTGGAATTCATGCT	59.115
TRINITY_DN23241_c0_g1_i9_gene=TRINITY_DN23241_c0_g1_len=2357	(AG)21	GCAACTTGTTCAGCGTTTGA	60.035	CCGAAGTAAAAGAGATTGAGCC	59.394
TRINITY_DN23241_c2_g2_i1_gene=TRINITY_DN23241_c2_g2_len=364	(GA)12	GAAGCAAAAGGGTGAACCAA	60.088	TCACACAAAAACACGCACCT	60.199
TRINITY_DN23242_c0_g1_i1_gene=TRINITY_DN23242_c0_g1_len=2789	(A)10	AACAAGAAAGTCGGCATCGT	59.74	GCATAATCTTGGATCAATGCTG	59.574
TRINITY_DN23242_c0_g5_i6_gene=TRINITY_DN23242_c0_g5_len=1061	(A)11	TAGATATCCTCAGGACCCGC	59.105	CGCTGCAATTCAATCTCAAG	59.566
TRINITY_DN23245_c1_g3_i1_gene=TRINITY_DN23245_c1_g3_len=271	(CA)6	TCCTCGTGTTCTCCAACGTA	59.288	CCGGAGCTGTTCATCTTCTC	59.95
TRINITY_DN23252_c1_g2_i4_gene=TRINITY_DN23252_c1_g2_len=1807	(CAA)5	AGCCCATCAACAGTTCCAAG	60.111	AGCGTGGTTCATATGGCTTC	60.103
TRINITY_DN23259_c0_g3_i1_gene=TRINITY_DN23259_c0_g3_len=1791	(TTC)5	CATTGTGGGACAGAGGGAGT	59.962	TTTGGGAAAACCCTAACCCT	59.677
TRINITY_DN23276_c3_g5_i2_gene=TRINITY_DN23276_c3_g5_len=1484	(ATG)5	TGAAGAGAAAGTGCGTGGTG	60.025	TCACAATTCACAAAGAAAACAAAAA	59.944
TRINITY_DN23294_c0_g2_i2_gene=TRINITY_DN23294_c0_g2_len=405	(AGA)5	AGCACCAGAAGATGGAATGG	60.073	ATCCGTCTGGAAAACACAGC	60.119
TRINITY_DN23298_c2_g1_i1_gene=TRINITY_DN23298_c2_g1_len=1298	(AAT)5	AAAGCTCATTACTAGAGCCAAAGTT	58.395	TGGGTGCAAAATCAACTCAA	60.088
TRINITY_DN23302_c0_g3_i1_gene=TRINITY_DN23302_c0_g3_len=260	(ACA)7	TCAGACACCGATACAACACCA	60.016	CAATTTAACTTGATTCTGACATGATTG	60.167
TRINITY_DN23307_c0_g3_i1_gene=TRINITY_DN23307_c0_g3_len=446	(A)11	CGAAAAACAACATGAGTGCAT	58.689	TGAGGTGCATGTTTGGGTAA	59.964
TRINITY_DN23309_c0_g1_i3_gene=TRINITY_DN23309_c0_g1_len=1617	(AG)6	CAGGTGGAGCTTCATGGTTT	60.111	CATGGTTCCATATGCATTTCA	59.247
TRINITY_DN23311_c1_g1_i1_gene=TRINITY_DN23311_c1_g1_len=699	(A)10	GCAGGAGAGGTCAAGACAGG	59.986	GAATAGAAGTGCGGGTTCGT	59.198
TRINITY_DN23311_c2_g1_i1_gene=TRINITY_DN23311_c2_g1_len=1476	(CAT)5	AAAACAATGTTCAAGGTGCAA	58.187	TGGAATGCAATGAGAATGGA	60.009
TRINITY_DN23311_c3_g1_i1_gene=TRINITY_DN23311_c3_g1_len=2514	(GA)10	TACTCCAATCACCTCCTCGG	60.065	TTTGGATGTAGTTGGTTTTCACTC	59.454
TRINITY_DN23312_c3_g3_i3_gene=TRINITY_DN23312_c3_g3_len=1115	(GA)8	TCCGATGAAAGATCGAAAAGA	59.77	TTGCATGCCATTCATTGTTC	60.476
TRINITY_DN23312_c3_g4_i4_gene=TRINITY_DN23312_c3_g4_len=918	(A)10	GATCCAGGAATCGGAAAACA	59.871	GCTGTTTTTGTGTAATGAAGTTGC	60.102
TRINITY_DN23315_c1_g1_i3_gene=TRINITY_DN23315_c1_g1_len=1715	(A)11	TCCTTGGACCGTAGGAGATTT	59.948	CATTTCCGTGTTGCATGAGT	59.572
TRINITY_DN23320_c0_g4_i1_gene=TRINITY_DN23320_c0_g4_len=854	(A)12	CTATGCTTGGCGTTTCCAAT	60.096	GTTTTGGCACTTGGAGTGGT	60.012
TRINITY_DN23328_c0_g1_i3_gene=TRINITY_DN23328_c0_g1_len=1306	(A)10	GCCAGTTCCTCCACTACAGC	59.874	TAGCAGAGGCTCAAGGTGGT	60.012
TRINITY_DN23341_c0_g1_i1_gene=TRINITY_DN23341_c0_g1_len=3985	(TTC)12	TCATAGTGACGTTGCACAAGC	59.927	CCAGGTTGACTGTAGCCCTC	59.721
TRINITY_DN23346_c2_g1_i1_gene=TRINITY_DN23346_c2_g1_len=255	(T)11	CCTCTGTGTTTTTCTGTGATTTC	57.907	TCCAAAGCCAACACTTAGCA	59.464
TRINITY_DN23351_c0_g1_i2_gene=TRINITY_DN23351_c0_g1_len=1384	(A)14	CGGGAATCCTATCGAACAAA	59.894	GAGAGGTTTCACAAGCTCCG	59.989
TRINITY_DN23351_c0_g1_i2_gene=TRINITY_DN23351_c0_g1_len=1384	(A)12	GGAGCTTGTGAAACCTCTCG	59.989	GGTCGGTTTTGTTTTTCCCT	60.2
TRINITY_DN23360_c0_g1_i5_gene=TRINITY_DN23360_c0_g1_len=2617	(AG)10	CTGTCACCTTTGTGTGTGGC	60.203	ATTTCATTTCCAAGGGGTCC	59.996
TRINITY_DN23389_c0_g2_i9_gene=TRINITY_DN23389_c0_g2_len=2403	(A)10	AACACTTTGACAGCCCAACC	60.012	TTTTTCCAGCGCACAGAAC	59.98
TRINITY_DN23391_c0_g1_i6_gene=TRINITY_DN23391_c0_g1_len=3593	(GAT)7	CTCGAAAGCCAGCCTCTATG	60.11	TTTTGTGTTGGTGATGGGTG	60.255
TRINITY_DN23391_c0_g1_i6_gene=TRINITY_DN23391_c0_g1_len=3593	(TC)7	TGATTCTGCATCTTCAACCG	59.799	GAAGGGAGACAACAACATCG	58.129
TRINITY_DN23405_c0_g1_i10_gene=TRINITY_DN23405_c0_g1_len=1091	(ACT)5	TGGTCTTGTTGGTGCCATTA	59.964	AGCAAAGACAAAGACACCCC	59.187
TRINITY_DN23406_c2_g2_i4_gene=TRINITY_DN23406_c2_g2_len=2298	(A)10	ACCCCATGCCATAGATTTCA	60.155	TTTGTGTTTTTGCATCTGGG	59.561
TRINITY_DN23409_c2_g2_i2_gene=TRINITY_DN23409_c2_g2_len=535	(TC)8	TCATCATTCATGATTTTTCACCA	60.181	CGATGCTTACGACGATTGAA	59.833
TRINITY_DN23409_c3_g6_i1_gene=TRINITY_DN23409_c3_g6_len=574	(AG)10	CTGCCGTTTTAGGTTTGAGG	59.741	GGTTTTCTATTTTCCTCCCTCT	57.018
TRINITY_DN23413_c0_g4_i2_gene=TRINITY_DN23413_c0_g4_len=2286	(AG)11	AGAGCTTTGATTGCGTCCAT	59.843	CACTCATTTTTCTTCCTCCGTC	60.11
TRINITY_DN23417_c0_g2_i2_gene=TRINITY_DN23417_c0_g2_len=1721	(A)10	GAGAGAAATTGTGGCTTCGC	59.962	CCTGCCAACCTTTTCACAGT	60.149
TRINITY_DN23419_c0_g1_i1_gene=TRINITY_DN23419_c0_g1_len=635	(CCA)5	TCCGAATCAAAATAGGGTGC	59.901	TGGAGGAAAGATTGGTGGAA	60.43
TRINITY_DN23420_c0_g1_i6_gene=TRINITY_DN23420_c0_g1_len=1566	(A)10	TCGCCGAAAATATCCTTCAC	60.038	TTCCGGTTCATATCGACCTC	59.894
TRINITY_DN23421_c0_g1_i9_gene=TRINITY_DN23421_c0_g1_len=2113	(A)10	CCACCTTTCAGAGTTGGATGA	60.096	TCTCCTTCTCTCTCCCAAACC	59.803
TRINITY_DN23422_c0_g1_i4_gene=TRINITY_DN23422_c0_g1_len=3295	(TCT)6	TCTCATTCAAACAATGGCGA	60.197	TCGAAGGAAGAAACCGAAGA	59.926
TRINITY_DN23442_c1_g5_i1_gene=TRINITY_DN23442_c1_g5_len=201	(T)14	CCATTGGATCGTCCTGAAAT	59.75	CAACAACAAGAAAGCACAATCA	58.87
TRINITY_DN23443_c0_g3_i1_gene=TRINITY_DN23443_c0_g3_len=336	(A)11	TCCGCGACGATTTCAACTAT	60.606	TTGAAGTTCCATGTAGTTTCACAA	58.721
TRINITY_DN23445_c0_g2_i4_gene=TRINITY_DN23445_c0_g2_len=816	(CT)6	GATTAGACACGTGGAATGGTTTT	59.299	CCCGTTCTGATCCGAGAATA	60.029
TRINITY_DN23469_c0_g1_i2_gene=TRINITY_DN23469_c0_g1_len=2147	(GAA)5	GAGCGAACCGGTGTTATTGT	60	TTTCCAGTCTCCACTCCACC	60.088
TRINITY_DN23469_c1_g2_i1_gene=TRINITY_DN23469_c1_g2_len=1522	(ACA)5	AAAGTTCGATCCACCACACC	59.827	TCTGGTTCTTGTTCTTGCGA	59.566
TRINITY_DN23469_c1_g2_i1_gene=TRINITY_DN23469_c1_g2_len=1522	(T)10	CCTCCATCATGTCTCTCCGT	60.072	TATGAAGCACGGACATCTCG	59.823
TRINITY_DN23471_c1_g1_i1_gene=TRINITY_DN23471_c1_g1_len=379	(TTG)6	GGTTCAGGTTCTGGTTTTGG	59.425	GCTTCATTGCTTAAATCCGC	59.822
TRINITY_DN23472_c0_g2_i1_gene=TRINITY_DN23472_c0_g2_len=567	(AG)8	GGTTTTTGTTTTGCTGCGAT	60.117	ACCAACGAATCATTCTGCAA	59.127
TRINITY_DN23472_c1_g2_i17_gene=TRINITY_DN23472_c1_g2_len=2795	(AG)15	GGAGCACCAACCACTTCAAT	59.973	GGGGTAAGGGTAAAGAAGCA	58.188
TRINITY_DN23474_c2_g1_i1_gene=TRINITY_DN23474_c2_g1_len=1056	(T)16	GGTTTTGGGGAGGGGTAGTA	60.046	ATAACAAGACCTCACCGCCA	60.517
TRINITY_DN23474_c3_g1_i3_gene=TRINITY_DN23474_c3_g1_len=956	(GA)7	AGCATCACCGTAAGCCATTC	60.103	GAACACAATCCTTCTCTCTCACG	60.295
TRINITY_DN23475_c0_g1_i3_gene=TRINITY_DN23475_c0_g1_len=1384	(A)10	CAAGCATATCGGTCAAAGCA	59.833	CGGACTTCATTTTCTGAGCC	59.813
TRINITY_DN23475_c0_g1_i3_gene=TRINITY_DN23475_c0_g1_len=1384	(TCA)5	CCACATCATTTGCCTCAATG	59.924	TTGGAAGCTGAAAAGCAACA	59.585
TRINITY_DN23479_c0_g1_i12_gene=TRINITY_DN23479_c0_g1_len=2023	(ATC)9	CATCGTAATCGTCAGCCTCA	59.823	TACCAGCATATTCGGGGAAG	59.916
TRINITY_DN23482_c3_g1_i1_gene=TRINITY_DN23482_c3_g1_len=936	(AGA)8	TCTTCGATCTGTGCGTCAAC	59.992	CTTTGGCGCTTACAACAACA	59.911
TRINITY_DN23491_c0_g1_i5_gene=TRINITY_DN23491_c0_g1_len=3803	(T)10	AAAATTCACACCCAACCACG	60.647	CAAAACTTGATATAGAAAGATGAGACC	58.049
TRINITY_DN23491_c0_g1_i5_gene=TRINITY_DN23491_c0_g1_len=3803	(TA)7	GCATTTGCATTTGCATTGAT	59.53	AATCATTGGAGGGTCCACAA	60.173
TRINITY_DN23491_c0_g2_i8_gene=TRINITY_DN23491_c0_g2_len=2300	(AACA)5	TCCCATTATCAGCAACACCA	59.924	ATCATCACCTTTGCCTCTGG	60.073
TRINITY_DN23492_c0_g1_i1_gene=TRINITY_DN23492_c0_g1_len=1957	(CAT)5	CCACCTCCTCAACAAACACA	59.565	CGGTGACTTCAACTGGGTCT	60.151
TRINITY_DN23494_c3_g3_i3_gene=TRINITY_DN23494_c3_g3_len=1114	(T)11	GGAAGAAAGAAACGCGTGAG	59.993	AAAACAAACAATTTTTGCAACTACA	59.127
TRINITY_DN23497_c0_g1_i3_gene=TRINITY_DN23497_c0_g1_len=1613	(AGA)6	GGGGAGTAGGTCGAGTTTCC	59.935	TTGCTTCATTTGTCAAAACCC	59.967
TRINITY_DN23514_c1_g1_i2_gene=TRINITY_DN23514_c1_g1_len=1112	(TG)6	AGGAGAAAAGGATGGGGCTA	60.032	TGCCTCAAAAACAAAAAGGG	60.081
TRINITY_DN23520_c0_g1_i2_gene=TRINITY_DN23520_c0_g1_len=1681	(GTT)5	ACTCAGACGGTGGCAGAGTT	59.907	TGCTGGATTTAATAAGGGGG	58.896
TRINITY_DN23520_c0_g2_i4_gene=TRINITY_DN23520_c0_g2_len=1448	(GTT)7	GGTGGCAACGTTTTGAATCT	59.978	GCGGTTTCAACAAAGGAGTT	59.218
TRINITY_DN23522_c0_g1_i1_gene=TRINITY_DN23522_c0_g1_len=355	(GA)10	AAACGCATTAATGGTGGAGG	59.823	AAACAAACCAAACCAGCCAG	60.008
TRINITY_DN23522_c0_g1_i1_gene=TRINITY_DN23522_c0_g1_len=355	(TGT)6	CTCTGACTTGACCCATGCAA	59.831	CTCGCACAGACAAATTCCCT	60.255
TRINITY_DN23522_c1_g1_i1_gene=TRINITY_DN23522_c1_g1_len=783	(TGA)9	CCATCACCACCTTTTGTTCC	60.21	TGTCTGCTGTTGGAGGAGAA	59.545
TRINITY_DN23522_c1_g1_i1_gene=TRINITY_DN23522_c1_g1_len=783	(TGT)5	GCAGAAGCAGAAGCAGGATT	59.723	TGTTGTTGCTAATCCAAACCC	59.853
TRINITY_DN23522_c2_g2_i1_gene=TRINITY_DN23522_c2_g2_len=1589	(TA)6	AGGTGGATATATAATCCTCAAATCTC	57.309	TCTAGGGTGGGATTTTGGTG	59.784
TRINITY_DN23522_c2_g2_i1_gene=TRINITY_DN23522_c2_g2_len=1589	(TGT)6	ATTGTGACGGAAAAACCGAG	59.971	CATTCCAAGAATGCAGCAAA	59.809
TRINITY_DN23528_c0_g1_i3_gene=TRINITY_DN23528_c0_g1_len=2029	(TTG)5	GGTAAGCTTCAACAGGGTGC	59.74	GGTGTAACAACATATAGACAGTGTTTG	58.166
TRINITY_DN23530_c0_g1_i1_gene=TRINITY_DN23530_c0_g1_len=1094	(A)10	CACCTTCCTGCCAAAATCAT	59.933	CACGAAGGGAATGAGGTGAT	59.927
TRINITY_DN23530_c0_g4_i1_gene=TRINITY_DN23530_c0_g4_len=621	(T)10	CACGAAGGGAATGAGGTGAT	59.927	CACCTTCCTGCCAAAATCAT	59.933
TRINITY_DN23543_c0_g1_i4_gene=TRINITY_DN23543_c0_g1_len=2781	(TTA)5	CACTGACACCTAAGATTCCTATTCC	59.473	TGTGCTCTTCCTACACAACCA	59.35
TRINITY_DN23543_c0_g1_i4_gene=TRINITY_DN23543_c0_g1_len=2781	(AAT)5	TAGCCAAGCTCAAGTGGACA	59.591	CCATTTGTGTCATCTATCCTACC	57.506
TRINITY_DN23547_c0_g1_i1_gene=TRINITY_DN23547_c0_g1_len=1814	(A)11	GGTTGTTACCACCACTCATCG	60.284	TGATGTTTGTGGAATCCGAG	59.496
TRINITY_DN23547_c0_g1_i1_gene=TRINITY_DN23547_c0_g1_len=1814	(ATG)5	TGCTTCCAACACCCTAGACA	59.288	GGCTAACCAAACCTTAACCACA	60.269
TRINITY_DN23551_c0_g3_i1_gene=TRINITY_DN23551_c0_g3_len=657	(CCA)5	AAAAACCCTCAATGGCCTCT	59.94	GAAGGATGGAGTTGTTGGGA	59.903
TRINITY_DN23556_c0_g1_i1_gene=TRINITY_DN23556_c0_g1_len=1773	(TC)6	CATGTGAAATTTCTTTGGTTGG	59.357	TTGTGATGGTTTTGGTGCAT	59.823
TRINITY_DN23556_c0_g1_i1_gene=TRINITY_DN23556_c0_g1_len=1773	(TCA)6	TCACAGTTTGCATTGGCTTC	59.847	CCAAATCTCAACTCCCCAAA	59.903
TRINITY_DN23561_c0_g1_i3_gene=TRINITY_DN23561_c0_g1_len=3333	(TC)7	CTTTCAATGGCTTCTCCTTGA	59.438	GACTGTTGCATGCTGATTTTG	59.336
TRINITY_DN23563_c0_g1_i3_gene=TRINITY_DN23563_c0_g1_len=1297	(ATT)13	CCTGAGTAGCCATTGAAGCC	59.836	TCTGCGAGTTCTGTTCCCTT	59.989
TRINITY_DN23563_c0_g1_i3_gene=TRINITY_DN23563_c0_g1_len=1297	(T)10	TGCAAGCGTTGAAATTATGC	59.848	AGCCTTCTCTTTCCGTGTCA	59.989
TRINITY_DN23563_c3_g1_i11_gene=TRINITY_DN23563_c3_g1_len=2785	(CGC)5	CCAACACTTCCCTGACTCGT	60.151	TTCGAGAAACCATTAACGCC	60.074
TRINITY_DN23563_c3_g1_i11_gene=TRINITY_DN23563_c3_g1_len=2785	(GA)8	GATGCTGATGCTGCTGAGTC	59.695	TTCCCATCCTACATCAAACCA	60.177
TRINITY_DN23563_c3_g1_i11_gene=TRINITY_DN23563_c3_g1_len=2785	(AGA)7	TGGTGTGGAAGTTGAAATCG	59.541	GTTTTTGTTCAATTTGCGCC	60.476
TRINITY_DN23566_c0_g2_i2_gene=TRINITY_DN23566_c0_g2_len=2652	(A)10	TCCATAGCATACCACAGCCA	60.096	TTGATTCATGCCAAAGGAAA	59.087
TRINITY_DN23573_c0_g3_i2_gene=TRINITY_DN23573_c0_g3_len=833	(A)10	AAAGTGGACCCAAGCAACTG	60.149	GCCATGTAATTGCGTTTGTG	59.999
TRINITY_DN23577_c0_g1_i1_gene=TRINITY_DN23577_c0_g1_len=234	(ATT)7	CAATCGTCACTGCCTCTTGA	59.984	GAGTTCCTAATCTCATTCGTCCC	60.323
TRINITY_DN23577_c1_g1_i1_gene=TRINITY_DN23577_c1_g1_len=286	(TAA)5	CGGGTTGGTGTCGTTTTAGT	59.891	TCCATCCAATCGCATACTCA	60.033
TRINITY_DN23583_c1_g3_i6_gene=TRINITY_DN23583_c1_g3_len=2179	(TA)6	TCCTTCACGCCTATTCGTTT	59.708	AGCTTGCCCGCTTACTTTTT	60.383
TRINITY_DN23584_c1_g1_i7_gene=TRINITY_DN23584_c1_g1_len=1696	(A)10	GCTCCTGCTCTTGATCCAAC	59.957	GCTCATGGATGCAAGAAGGT	60.226
TRINITY_DN23586_c0_g1_i4_gene=TRINITY_DN23586_c0_g1_len=2003	(A)10	CCCAAAGTCATACCCCAATG	60.044	TGATAGTGGCAGGATCGAGTT	59.708
TRINITY_DN23592_c0_g1_i2_gene=TRINITY_DN23592_c0_g1_len=2598	(AT)7	ACATGTTTCACCAAACAAATCTT	57.588	TTGGTGGACCTTTACAAGCC	59.971
TRINITY_DN23592_c0_g1_i2_gene=TRINITY_DN23592_c0_g1_len=2598	(T)12	ATGGAGCAAAAGCAAGCAAT	59.851	AATGTGGGATCAACATCATTTATT	58.567
TRINITY_DN23592_c0_g1_i2_gene=TRINITY_DN23592_c0_g1_len=2598	(A)10	CAGAATCGAATCGAACCAAAA	60.06	TCGAATTGAATCGAAATTGAAA	59.543
TRINITY_DN23594_c0_g1_i4_gene=TRINITY_DN23594_c0_g1_len=2272	(A)11	CTCAAAATTTCATGGCCAAA	58.6	AAATCAGGAGCAGGCATCAG	60.362
TRINITY_DN23595_c0_g1_i2_gene=TRINITY_DN23595_c0_g1_len=1935	(AT)7	GCTGGACTCAGCTCTTCACC	60.143	GCCCAGATCACTTTTTCAGTG	59.726
TRINITY_DN23596_c0_g1_i2_gene=TRINITY_DN23596_c0_g1_len=3555	(A)12	AAAAAGGATTTGCAGTCCCC	60.299	TCCTGAATTCTTCCGGAATTT	59.896
TRINITY_DN23596_c0_g1_i2_gene=TRINITY_DN23596_c0_g1_len=3555	(TA)7	AAAAATTTCGGGACAAATAGCA	59.851	GGGGTTGACATATATTAACAGTTCC	59.025
TRINITY_DN23596_c0_g1_i2_gene=TRINITY_DN23596_c0_g1_len=3555	(AT)6	AAGTTGGCAATAACGAACGG	59.996	TTTGAGATTCGAGAACGCCT	59.955
TRINITY_DN23596_c0_g1_i2_gene=TRINITY_DN23596_c0_g1_len=3555	(A)10	GAAATGAAATCAAATGGAATGGA	60.015	TTTAGTTGGCGAAGGGATTG	60.067
TRINITY_DN23596_c0_g1_i2_gene=TRINITY_DN23596_c0_g1_len=3555	(C)11	TCCATTCCGTCATAACACCA	59.774	TGCAAATAAGAGTATGCAAAGGA	58.949
TRINITY_DN23596_c0_g1_i2_gene=TRINITY_DN23596_c0_g1_len=3555	(A)10	TGATCAGACTACAACCAGCAGAA	59.928	AAGAAAAATGTGGACGCCAT	59.434
TRINITY_DN23601_c0_g1_i2_gene=TRINITY_DN23601_c0_g1_len=2350	(A)11	AAATAGCCTTGCCGTTGTTG	60.131	CGTTTCTCACGTTTTTCCGT	60.147
TRINITY_DN23615_c0_g1_i1_gene=TRINITY_DN23615_c0_g1_len=1704	(GTT)6	AAGGCTTGTGGAAGAAGGGT	60.11	ATCCCCTCAACACAAACCAA	60.21
TRINITY_DN23615_c0_g1_i1_gene=TRINITY_DN23615_c0_g1_len=1704	(TGA)6	TCTAGCGCTCGATATTCGGT	59.967	GGTGATGGAGATGGTGGAGT	59.774
TRINITY_DN23624_c0_g2_i3_gene=TRINITY_DN23624_c0_g2_len=668	(T)10	CTGCAACGTGAAAATTGGAA	59.706	TGCATACGTCGTGGTGGTAT	59.871
TRINITY_DN23627_c0_g1_i9_gene=TRINITY_DN23627_c0_g1_len=3323	(GAG)6	TGATGAGCCGTCAATAGGTG	59.673	CAAACGACGAGAGAAGAGGG	59.982
TRINITY_DN23627_c0_g2_i1_gene=TRINITY_DN23627_c0_g2_len=788	(A)14	GCTCGGCTGAGGAAGTTATG	59.978	TCCCTTTTCTCCCCGTTTAT	59.772
TRINITY_DN23631_c4_g2_i1_gene=TRINITY_DN23631_c4_g2_len=1596	(A)10	AAGTCTGGAAAGAGTAATCCCC	57.779	TGAGGGTGTTCGGATAGGAG	60.065
TRINITY_DN23631_c4_g2_i1_gene=TRINITY_DN23631_c4_g2_len=1596	(T)15	GCAATGCCTAACCATTTTGC	60.465	GTTGTTGCTTTGGTGTGGAA	59.591
TRINITY_DN23633_c0_g1_i4_gene=TRINITY_DN23633_c0_g1_len=1563	(A)13	TCCTCATGACCGAATTTTCC	59.871	CACGTTCAGTGGTTGCACTT	59.794
TRINITY_DN23634_c0_g1_i6_gene=TRINITY_DN23634_c0_g1_len=2408	(TC)9	TCCCATAGATCCTCCACTCG	60.027	TCTGGTCCACCGTAAACACA	60.001
TRINITY_DN23634_c1_g1_i2_gene=TRINITY_DN23634_c1_g1_len=787	(TC)12	GATGGCATACCAGATGCAAA	59.504	GAAGGTGCAAGGTTGGTGAT	59.973
TRINITY_DN23638_c2_g1_i1_gene=TRINITY_DN23638_c2_g1_len=718	(GTT)6	TAAGAATCAGTTCCGCCAGG	60.206	TGTTGAGGATGAGGTTGTGG	59.52
TRINITY_DN23638_c5_g3_i1_gene=TRINITY_DN23638_c5_g3_len=534	(A)15	CCCACATGTGTTATTTCCCA	59.097	GACACTGGTTGGGGTACAGG	60.275
TRINITY_DN23639_c1_g1_i4_gene=TRINITY_DN23639_c1_g1_len=1066	(T)10	GAAGTGGAGAAGGTGGCTTG	59.844	TCACTTCCCCCTCAAGTAAAA	58.68
TRINITY_DN23643_c0_g1_i4_gene=TRINITY_DN23643_c0_g1_len=2686	(A)13	TCTGTGCATGGTGTATCCGT	59.992	TACTCCTCCATTGCTGGCTT	59.836
TRINITY_DN23645_c0_g1_i2_gene=TRINITY_DN23645_c0_g1_len=2490	(A)10	TCCAAGGGTTCCAGAAATTG	59.903	TCCATCTGTAATCGGCATGA	60.033
TRINITY_DN23655_c1_g2_i9_gene=TRINITY_DN23655_c1_g2_len=890	(AG)8	GCATTTGAGCAGCAAGTTGA	60.142	GGAGGGATCCTCGGATTCTA	60.367
TRINITY_DN23659_c0_g1_i2_gene=TRINITY_DN23659_c0_g1_len=1520	(AG)12	GATGGTGGGGAGTGTGTGTA	59.234	TCGTGTCTATCGTCTTCGTCA	59.455
TRINITY_DN23664_c1_g1_i12_gene=TRINITY_DN23664_c1_g1_len=2116	(A)13	AAAGGGTTTGCCTAAAATTGC	59.512	CAAGGCTTCTCTCCAAAGTGA	59.601
TRINITY_DN23664_c1_g1_i12_gene=TRINITY_DN23664_c1_g1_len=2116	(TGTTGA)5	CGAACTCGACGAACTCAACA	60.025	GCAATGGAGATGGAACATCA	59.456
TRINITY_DN23672_c1_g1_i10_gene=TRINITY_DN23672_c1_g1_len=1861	(T)10	TGCTCCATGAACAAGAACGA	60.39	AAAGAAACTATGAGTTGAGGGTGA	58.393
TRINITY_DN23675_c6_g2_i3_gene=TRINITY_DN23675_c6_g2_len=1823	(T)11	GATGCAGAAAATCTTGGTCAAA	59.205	TGTAGTCCCTGCCTGGTTTC	60.111
TRINITY_DN23678_c3_g2_i3_gene=TRINITY_DN23678_c3_g2_len=1101	(TAT)18	CCACGATCTCTCTGTTTATATCCC	60.218	AGAACTTGGTGGTGAGGTGAG	59.211
TRINITY_DN23682_c0_g1_i5_gene=TRINITY_DN23682_c0_g1_len=1937	(T)10	GCAAAAATGCCACCTTGAAT	59.945	GCTTCTTCTTCAACAAGGGGT	59.743
TRINITY_DN23684_c2_g2_i1_gene=TRINITY_DN23684_c2_g2_len=839	(T)12	GCCTGACAGAATAGAACGGC	59.843	GCTCCAAAATGTACGGCAAT	59.967
TRINITY_DN23686_c0_g1_i2_gene=TRINITY_DN23686_c0_g1_len=1748	(GGA)5	CCATGTGGGGATTATGGAAG	60.006	GAACGATTTTGACCCCACAT	59.653
TRINITY_DN23692_c0_g1_i1_gene=TRINITY_DN23692_c0_g1_len=1647	(T)10	CGAACCAAGCACTTCAAACA	59.881	AGGTTTGGCTTTTCCTGCTT	60.242
TRINITY_DN23704_c0_g1_i8_gene=TRINITY_DN23704_c0_g1_len=4555	(A)12	ACCCCTCACCCTCTTGAGTT	59.968	ATCGGAAGGTTGAATTGCAG	60.074
TRINITY_DN23707_c3_g1_i1_gene=TRINITY_DN23707_c3_g1_len=679	(T)10	CGTTCCAGCTTCTTTTTCCA	60.357	TCCTTCCTCTCTCAACGCAT	59.95
TRINITY_DN23708_c0_g2_i1_gene=TRINITY_DN23708_c0_g2_len=291	(ATA)6	GCTCTAAGTTTGGGGCTGTG	59.875	TCAATCCATGGAAAACCAGC	60.843
TRINITY_DN23708_c1_g2_i1_gene=TRINITY_DN23708_c1_g2_len=1412	(T)10	CATTGGCTAACCGATGTTCC	60.331	TTGGGTTGCTAAAATCACTCC	59.077
TRINITY_DN23708_c1_g2_i1_gene=TRINITY_DN23708_c1_g2_len=1412	(TC)9	TCTAGCTCTGCCGGTTTTGT	60.015	CACTTGCTCTTCCCATACCAA	60.118
TRINITY_DN23708_c2_g1_i2_gene=TRINITY_DN23708_c2_g1_len=1459	(CT)12	CTTTCGGAGAGCTGTTGACC	59.989	TTATTGCAGCGTTGATCTGC	59.983
TRINITY_DN23720_c0_g1_i18_gene=TRINITY_DN23720_c0_g1_len=3584	(A)11	CCGAATCGAAAGAAGCTGAG	60.088	CGATTCCGTTTCGTCAGAGT	60.255
TRINITY_DN23724_c0_g1_i5_gene=TRINITY_DN23724_c0_g1_len=1716	(CAT)5	AACCATTGGCATAATAAGGGG	59.922	ACTTGTTCAACCACCATGCC	60.823
TRINITY_DN23730_c0_g1_i4_gene=TRINITY_DN23730_c0_g1_len=3509	(A)11	AAATCAAAACCCAAAACCCC	59.903	TCTTAACCGACGAAACCACC	59.971
TRINITY_DN23730_c0_g1_i4_gene=TRINITY_DN23730_c0_g1_len=3509	(T)12	GGTGGTTTCGTCGGTTAAGA	59.971	TGGCTTCCAAAAATAACAGACA	59.625
TRINITY_DN23734_c4_g11_i1_gene=TRINITY_DN23734_c4_g11_len=1299	(AT)10	CGTGACATTTGTCCCTTACTG	58.146	TGATCTTTGTGGTTTTAGAAAATGAA	60.251
TRINITY_DN23738_c2_g2_i2_gene=TRINITY_DN23738_c2_g2_len=474	(T)13	ATCATCGCCATCCTCGTATC	59.884	CCCTTCTTCATACTTCGACCC	59.948
TRINITY_DN23739_c0_g2_i1_gene=TRINITY_DN23739_c0_g2_len=2442	(A)10	TATGGCTGTGTCGTCTGCTC	60.016	GCGAAGGCATTGAGAGAAAG	60.096
TRINITY_DN23740_c0_g1_i3_gene=TRINITY_DN23740_c0_g1_len=1263	(TC)7	CATCCATTTGTTGCCACTTG	59.964	GATCTGAGTCCGAAGCAAGC	60.104
TRINITY_DN23741_c0_g1_i1_gene=TRINITY_DN23741_c0_g1_len=2908	(A)13	GAATTTCCAGAGCCACCAAA	60.051	ACTTTTCTCCCTTGACCCGT	59.972
TRINITY_DN23744_c0_g1_i3_gene=TRINITY_DN23744_c0_g1_len=1873	(A)10	GCCATAAACGCCTTTGACAC	60.511	TCTTCCAGATGAATCCCAGC	60.158
TRINITY_DN23745_c0_g1_i4_gene=TRINITY_DN23745_c0_g1_len=2333	(CAA)5	GGAGATGGCGAATACCTTGA	60.036	TCTCCGTTCTCTCTGTTCACC	59.44
TRINITY_DN23746_c4_g2_i2_gene=TRINITY_DN23746_c4_g2_len=1390	(A)10	CTTTCGCATTTTTGTTGGCT	60.244	TTCTTGGACACTTTGCACCA	60.278
TRINITY_DN23753_c0_g1_i3_gene=TRINITY_DN23753_c0_g1_len=3345	(A)10	TGGTGGAGGAGTGTGAACTG	59.705	CCCAGTGAGACCCTACTCATTT	59.502
TRINITY_DN23754_c0_g3_i1_gene=TRINITY_DN23754_c0_g3_len=383	(T)10	ATTTGGGGAAAATTTGAGGG	59.992	TCCACTATTTGTTGACACCATT	57.004
TRINITY_DN23754_c0_g3_i1_gene=TRINITY_DN23754_c0_g3_len=383	(GAA)5	TGACCTGCTCATGGTGAAGA	60.402	AGTTGGGTCGGTCAAAAATG	59.83
TRINITY_DN23756_c0_g5_i2_gene=TRINITY_DN23756_c0_g5_len=1499	(A)14	CAAATAGCATTTGAGCATAGAGC	58.26	ATGCATGCTCATACAATCGG	59.529
TRINITY_DN23756_c0_g5_i2_gene=TRINITY_DN23756_c0_g5_len=1499	(A)10	TACACCCGCAAACAGAACCT	60.55	GGCTTCTCGTGTGATTCGTT	60.263
TRINITY_DN23764_c4_g1_i3_gene=TRINITY_DN23764_c4_g1_len=910	(TG)6	GCAGAAATCAGGTGCAACAA	59.847	ACTTCAAACGTGTTTTCGGG	60.008
TRINITY_DN23764_c4_g3_i6_gene=TRINITY_DN23764_c4_g3_len=2299	(TCA)5	TGTACTCGAGGCTCTGAGGG	60.545	GAGGGGACGCCTATACATCA	59.917
TRINITY_DN23765_c0_g1_i6_gene=TRINITY_DN23765_c0_g1_len=4321	(A)12	TCTCTCCCCTTCCGTTTCTT	60.183	ACCTGATTGGGAGAACATCG	59.927
TRINITY_DN23769_c2_g3_i1_gene=TRINITY_DN23769_c2_g3_len=1007	(A)15	GAGGTATGCTGAAGCAGGGA	60.362	TGGGCTTGGATGCTCTATTC	60.177
TRINITY_DN23771_c1_g1_i2_gene=TRINITY_DN23771_c1_g1_len=487	(GGT)7	AGGCTCTGGATTTGGTGATG	60.073	TCCACCACATTCCCCACTAT	60.05
TRINITY_DN23771_c1_g1_i2_gene=TRINITY_DN23771_c1_g1_len=487	(AGG)6	CTGCCTGGGAATGTAGTCGT	60.134	CATCACCAAATCCAGAGCCT	60.073
TRINITY_DN23771_c3_g1_i1_gene=TRINITY_DN23771_c3_g1_len=321	(ACC)6	CATCTCTTCTTCCTCCTCCG	58.963	GGGAGAGAGTGTGGTTGTGG	60.563
TRINITY_DN23774_c1_g3_i1_gene=TRINITY_DN23774_c1_g3_len=228	(TA)6	CCGCCACTACTCACATCACA	60.745	ACGTATCAGTGTCGGTGTCG	59.622
TRINITY_DN23778_c1_g1_i4_gene=TRINITY_DN23778_c1_g1_len=2258	(AAT)5	CGGGAGTTTTCACAAAGCAT	60.11	CCCTTACTGGCGTTCTTTGA	60.241
TRINITY_DN23784_c3_g1_i1_gene=TRINITY_DN23784_c3_g1_len=1158	(T)10	AAAGTAATTTCGACAACAATAATGG	57.783	GCTCATGGCCGTCTGTAAGT	60.285
TRINITY_DN23788_c0_g2_i1_gene=TRINITY_DN23788_c0_g2_len=1956	(T)12	CCCTTTAGATTGGAAGCCAG	58.785	TTCGGTATTACACAAACCTCAA	57.257
TRINITY_DN23788_c0_g5_i2_gene=TRINITY_DN23788_c0_g5_len=1152	(A)15	TCCAATCTGCTATCACAAGCC	60.228	TGTTTGGTTGCATATTTTGAAGTT	59.822
TRINITY_DN23792_c2_g1_i2_gene=TRINITY_DN23792_c2_g1_len=1862	(A)10	CCCATGATTCAAAATCCAAAA	59.624	TGTGAATCGACACCCACTGT	60.005
TRINITY_DN23793_c6_g1_i1_gene=TRINITY_DN23793_c6_g1_len=577	(A)10	CCGTCCAACATTTTGTCTTG	59.021	TGGTCTTCCATTGAACATCTTG	59.971
TRINITY_DN23793_c9_g1_i5_gene=TRINITY_DN23793_c9_g1_len=1082	(GTC)5	AACGCGTGATGCTTCTTCTT	60.022	TCCCACATTGCACTTCAAAA	60.088
TRINITY_DN23793_c9_g1_i5_gene=TRINITY_DN23793_c9_g1_len=1082	(TTG)5	TGATCGGCTTTGACACAGAG	59.984	GGGCTTGCTTCCTAAAGAGG	60.332
TRINITY_DN23796_c2_g1_i2_gene=TRINITY_DN23796_c2_g1_len=1842	(ATG)5	TACCAAAAATCCGCGAAAAC	59.943	TACTCTCACCCGATTCTCCG	60.21
TRINITY_DN23806_c0_g1_i8_gene=TRINITY_DN23806_c0_g1_len=3971	(T)11	CGTAAATGTTCCTTCCCAAAA	58.974	TGATATCGAATGGCTGCAAA	60.179
TRINITY_DN23807_c2_g1_i1_gene=TRINITY_DN23807_c2_g1_len=3847	(ACA)5	TCGCAACAAGTTGGAATCAA	60.234	AACCTTCTTGTTCACGTGGG	60.005
TRINITY_DN23812_c2_g3_i1_gene=TRINITY_DN23812_c2_g3_len=620	(A)11	CCTTGCCATTTTCAACCCTA	59.931	TAGAACTGCTCGTGTGGTGC	60.056
TRINITY_DN23812_c3_g1_i2_gene=TRINITY_DN23812_c3_g1_len=2351	(CAT)6	AAAACATTCCCATGTATCAGCA	59.343	GCACACAACATCGGTGAAAC	60.016
TRINITY_DN23812_c3_g1_i2_gene=TRINITY_DN23812_c3_g1_len=2351	(TGT)5	GGTGGAAGAGGATGTGGCTA	60.073	CAATGACCAAGCTCCACTGA	59.831
TRINITY_DN23819_c0_g2_i1_gene=TRINITY_DN23819_c0_g2_len=1784	(A)11	CACTACCACCAACCGATTCA	59.415	CGGAATGAAGAAGTCTCCCC	60.959
TRINITY_DN23820_c2_g2_i3_gene=TRINITY_DN23820_c2_g2_len=842	(TTG)5	AGGATCCAATGCTGATTTGC	60.043	AGCAAGGGATTGATCCAACA	60.461
TRINITY_DN23822_c0_g1_i1_gene=TRINITY_DN23822_c0_g1_len=1187	(CCA)7	GCAAGTTGCAAACACAATTAAAA	59.247	CATTGAAGGATGCAGTGGTG	60.112
TRINITY_DN23825_c1_g1_i3_gene=TRINITY_DN23825_c1_g1_len=1492	(T)10	GCCACCGAAATTTAAAACCA	59.81	TCAAACTACGCGGACATCTG	59.864
TRINITY_DN23838_c1_g1_i3_gene=TRINITY_DN23838_c1_g1_len=1198	(ACA)8	CCATGTAGAGGGATTTGCGA	60.992	AGCCGATCACACCTAGTGAAA	59.749
TRINITY_DN23838_c1_g4_i1_gene=TRINITY_DN23838_c1_g4_len=395	(A)10	AAGATGACGGGTTGGTTGAG	59.966	TTGATTCTGAAAAATGGGAAAAA	59.819
TRINITY_DN23844_c0_g1_i1_gene=TRINITY_DN23844_c0_g1_len=3619	(T)12	CTTCCTCCATCTCTGAAGCG	60.088	ACGATTGTTCCGATTCTTCG	60.074
TRINITY_DN23845_c0_g5_i1_gene=TRINITY_DN23845_c0_g5_len=899	(A)10	AAACAGCGGATAATGCCAAA	60.456	CTTGCCCACAATGGCTAAAT	59.96
TRINITY_DN23848_c0_g1_i1_gene=TRINITY_DN23848_c0_g1_len=323	(TC)8	GAAAAATCAGTTACAACAGAAAATGG	59.42	AACTTGTGATACTTGGGCGG	59.993
TRINITY_DN23849_c1_g1_i7_gene=TRINITY_DN23849_c1_g1_len=2618	(T)14	TCATTGGTGTCATGCCAGAT	59.925	TTATCGAAACCGATTCTCCG	60.031
TRINITY_DN23856_c0_g2_i2_gene=TRINITY_DN23856_c0_g2_len=1357	(A)10	GCTGTCAGAAGGAATGGGAG	59.803	TTGGAAGACATTGGCATGAA	60.049
TRINITY_DN23859_c0_g1_i9_gene=TRINITY_DN23859_c0_g1_len=2808	(A)11	CCACGGGGAATAGAAGAAAA	59.016	CTGCAATGACGGAGTTCTCA	59.984
TRINITY_DN23860_c1_g3_i1_gene=TRINITY_DN23860_c1_g3_len=502	(GA)7	GAAGGGTGCACAGGTTTGTT	60.012	AAGAGAAGACATAAAAGTCACGTTG	58.165
TRINITY_DN23862_c0_g1_i1_gene=TRINITY_DN23862_c0_g1_len=1565	(TCC)5	CCACAACATCAATCGTCATCA	60.383	CGGGGAAAGGTAAGAAACCT	59.455
TRINITY_DN23863_c2_g2_i1_gene=TRINITY_DN23863_c2_g2_len=705	(A)18	AAGAGGATTGAGTAGCGGCA	59.978	CAGCTTCTTGTTTCTTGTGCTG	60.225
TRINITY_DN23866_c0_g1_i4_gene=TRINITY_DN23866_c0_g1_len=1455	(AG)6	AATCCAGCACGAGATCCAAC	60.081	AACTTCATCACAAAACCAACACA	59.434
TRINITY_DN23867_c2_g1_i1_gene=TRINITY_DN23867_c2_g1_len=618	(A)11	TGAATTACTTCCAACATCATCCC	60.068	GCCATCAGGGTCAGATGAGT	60.08
TRINITY_DN23868_c0_g1_i2_gene=TRINITY_DN23868_c0_g1_len=2773	(ATA)5	GAAACAGCCAGAATACCGGA	60.074	TGAGTTTGCATGAGACCGAG	59.984
TRINITY_DN23877_c1_g2_i3_gene=TRINITY_DN23877_c1_g2_len=1029	(AAAAG)7	GTGTCATTCCCTCCTTGCAT	59.934	GTGATGGAGCAGGGTTTGTT	59.973
TRINITY_DN23877_c1_g2_i3_gene=TRINITY_DN23877_c1_g2_len=1029	(T)14	TGGAAATTGTGACAGTGGGA	59.935	CCAAACCAAGCTACGTGTCA	59.758
TRINITY_DN23877_c1_g4_i1_gene=TRINITY_DN23877_c1_g4_len=772	(GAA)5	GCGGAGGTTGAAATTTGTGT	59.978	CCCTCACTTTCCCATCCTTT	60.298
TRINITY_DN23879_c1_g1_i1_gene=TRINITY_DN23879_c1_g1_len=1315	(A)13	CCATCAACATCATAACCAAATCA	59.578	GATCCGTTGAATTTTGGTGC	60.318
TRINITY_DN23879_c3_g1_i1_gene=TRINITY_DN23879_c3_g1_len=1608	(A)14	TATTCGTCTCCTGCGGATCT	59.797	CGGTCTTGGACCCAGAAATA	59.926
TRINITY_DN23882_c1_g1_i2_gene=TRINITY_DN23882_c1_g1_len=2095	(A)10	AAACGTCCACACATTCTCCA	58.984	GGCGTTTGAAATAAGGGGAT	60.15
TRINITY_DN23882_c1_g1_i2_gene=TRINITY_DN23882_c1_g1_len=2095	(GA)8	TCAAAAATCGATCGTTAAATTCG	60.304	GAACAAGGGTTCCCTTTTGAA	60.318
TRINITY_DN23882_c2_g1_i2_gene=TRINITY_DN23882_c2_g1_len=1788	(ATA)6	ATGAAACATGACAGCACGGA	60.12	TGAAGCTAGCACTACCTGTGGA	60.074
TRINITY_DN23883_c1_g1_i2_gene=TRINITY_DN23883_c1_g1_len=791	(A)10	ATTGGAGAACCGATCCACTC	58.943	AGCCACAAAGATCAACCGTC	60.119
TRINITY_DN23895_c0_g1_i1_gene=TRINITY_DN23895_c0_g1_len=2088	(TGA)6	GCATCCTCTTCAACCAAAGC	59.82	TTGTCCAATCAATAACCGCA	59.93
TRINITY_DN23897_c0_g1_i2_gene=TRINITY_DN23897_c0_g1_len=1502	(A)13	ATCAAAGCTCAAATGGGCAC	60.081	AAAGAGTTGGCAACAAGCGT	59.92
TRINITY_DN23897_c1_g1_i3_gene=TRINITY_DN23897_c1_g1_len=765	(TAAT)5	GGTTGACTGCCTGAAACCTC	59.703	GGTTTGGCTTCCATTTTCAA	59.916
TRINITY_DN23904_c0_g1_i3_gene=TRINITY_DN23904_c0_g1_len=2374	(TCT)5	GTGAGGAAGAAATGCAGGGA	60.195	TGGTGGTGTACACAGCAAAAA	60.058
TRINITY_DN23908_c0_g1_i2_gene=TRINITY_DN23908_c0_g1_len=1366	(A)10	TGCTTCGTTACAAATAAATTGCTC	59.716	AAAGGGAGGAACACTTTGGC	60.476
TRINITY_DN23920_c2_g1_i6_gene=TRINITY_DN23920_c2_g1_len=2286	(TGG)5	CTCGTGCTTTCCATTGGTTT	60.11	CACAGAAGGCACCATAAGCA	59.864
TRINITY_DN23920_c3_g1_i1_gene=TRINITY_DN23920_c3_g1_len=405	(T)12	AGGGGAACGGTTTCTTTTTG	60.324	TCCACACCCTCTCTAACAATCA	59.592
TRINITY_DN23920_c3_g1_i1_gene=TRINITY_DN23920_c3_g1_len=405	(TGG)5	TGGTTCGGTTTTGGAAGACT	59.569	CAAAAAGAAACCGTTCCCCT	60.324
TRINITY_DN23923_c0_g1_i1_gene=TRINITY_DN23923_c0_g1_len=548	(A)15	CCGAGCATTGATTGTACCCT	59.955	CTTCACATGCGTTTTAGCCA	59.872
TRINITY_DN23923_c3_g1_i3_gene=TRINITY_DN23923_c3_g1_len=1858	(A)13	CGCACGCCTAGACTGTTAAT	58.081	AACGGATGCTGAAGCTGTCT	60.02
TRINITY_DN23927_c0_g1_i3_gene=TRINITY_DN23927_c0_g1_len=1822	(AAG)7	CAAAACCTAAGAAACTCGGGC	60.116	TTCGCAGGAAATATGGAAGC	60.175
TRINITY_DN23927_c0_g3_i1_gene=TRINITY_DN23927_c0_g3_len=1303	(CTT)6	GTCGGTAGTGCTGTTTGTCG	59.365	TCTCACACACACATTTTCTTCCTT	60.075
TRINITY_DN23927_c0_g3_i1_gene=TRINITY_DN23927_c0_g3_len=1303	(TTG)6	TGAACAAACTCGAACTTGCG	60.027	TCGACAAACAGCACTACCGA	60.449
TRINITY_DN23930_c3_g1_i1_gene=TRINITY_DN23930_c3_g1_len=392	(T)11	AAGCTTGAACAAAAATCGCC	59.343	TAAAACAAATGGTGCCTGGG	60.722
TRINITY_DN23930_c4_g1_i1_gene=TRINITY_DN23930_c4_g1_len=1181	(A)12	TGCACACCACAATCTTTTCC	59.547	TGAGGATTCAACCAGGTGCT	60.656
TRINITY_DN23930_c4_g3_i1_gene=TRINITY_DN23930_c4_g3_len=1643	(A)14	CTGAATTGCACATCGGTCAA	60.665	CAAGGACTGCCATTTCCACT	60.111
TRINITY_DN23943_c0_g1_i1_gene=TRINITY_DN23943_c0_g1_len=10353	(T)16	CGATTGAGGGGTAAGCAAGA	60.206	GATCACCAAGCACCCTCTGT	60.12
TRINITY_DN23947_c1_g2_i7_gene=TRINITY_DN23947_c1_g2_len=2510	(A)12	TGGATGGAAAAGAAAACGGA	60.418	GGCCCTGTTGGTCAAGTTTA	59.971
TRINITY_DN23949_c0_g1_i1_gene=TRINITY_DN23949_c0_g1_len=2270	(ATC)5	ATTGACCTCCGGAATGACTG	59.927	GAGGCGAGAACCTGAAACTG	59.989
TRINITY_DN23949_c0_g4_i4_gene=TRINITY_DN23949_c0_g4_len=1899	(A)10	TCTGCATCAACAAAACCATCA	60.104	GGTTCGAGAAATGGAAGGGT	60.306
TRINITY_DN23951_c0_g1_i1_gene=TRINITY_DN23951_c0_g1_len=1778	(T)11	TCCATCACAACGGCTAAACA	60.111	TTCACTTTAGGAGGAATCAAACAA	59.203
TRINITY_DN23952_c3_g1_i1_gene=TRINITY_DN23952_c3_g1_len=688	(A)11	TCCTGCAATGATTTCTCCCT	59.629	TTATTGTCCGCCCTCTCCTA	59.662
TRINITY_DN23954_c0_g1_i6_gene=TRINITY_DN23954_c0_g1_len=1409	(A)10	ATGGAAATTGAAAAGTGCGG	59.938	GAATCAATTCTTCGAATTCAGGT	58.639
TRINITY_DN23963_c1_g1_i1_gene=TRINITY_DN23963_c1_g1_len=1855	(A)15	GAGGCATAGAGCCAGTCACC	59.834	GAAGTTTGCTGCTCCGGTTA	60.386
TRINITY_DN23966_c0_g1_i2_gene=TRINITY_DN23966_c0_g1_len=1114	(A)10	TCTTTGATGCTTTCACACCG	59.84	CTGCGATTTGGGTTTTCAGT	60.11
TRINITY_DN23967_c1_g2_i2_gene=TRINITY_DN23967_c1_g2_len=1472	(A)12	TGACGTTGTTGTTGTTGCAG	59.346	CTCCATTCTTCTTTGTGGCG	60.766
TRINITY_DN23970_c1_g4_i1_gene=TRINITY_DN23970_c1_g4_len=1351	(A)10	CCATCTCATTCTCACCATGC	59.04	AATCTAACGCGGTTTTGGTG	59.996
TRINITY_DN23971_c2_g1_i2_gene=TRINITY_DN23971_c2_g1_len=4582	(A)11	GCAATACACTGTCCCAACCC	60.24	GATGAAGAAGCAGGTGAGGG	59.803
TRINITY_DN23974_c0_g1_i13_gene=TRINITY_DN23974_c0_g1_len=2583	(A)12	TCCATATTCGCCATTTGGTT	60.153	ACAAAGATGGTGTCATGCAG	57.067
TRINITY_DN23978_c0_g1_i2_gene=TRINITY_DN23978_c0_g1_len=1219	(TC)9	CGTCGACGGTAAACAAATGA	59.585	AGCTGGCCACACGTTTCTAT	59.763
TRINITY_DN23983_c4_g1_i3_gene=TRINITY_DN23983_c4_g1_len=1626	(A)18	CCATCCTTCAATTTCTAGCACA	59.225	GTTGAGCCCACAGAAAAACG	60.668
TRINITY_DN23984_c0_g1_i4_gene=TRINITY_DN23984_c0_g1_len=2155	(ATA)11	CCATTCATAATGGGGAGACG	60.148	CGTTGCAGTCGCATAAAGAC	59.493
TRINITY_DN23984_c0_g2_i4_gene=TRINITY_DN23984_c0_g2_len=401	(T)11	CCCAACGAAACAAATCCAAC	60.206	TGCTGTTGTGGTGAAGAAGC	60.032
TRINITY_DN23987_c0_g3_i1_gene=TRINITY_DN23987_c0_g3_len=566	(T)16	ATCGATTGGGATGTGGTGAT	60.018	TTGGACTTTGCTAGAGTTCGC	59.646
TRINITY_DN23988_c0_g1_i2_gene=TRINITY_DN23988_c0_g1_len=4161	(TTTC)6	AAGGGGAAAAGGAAGGTGTG	60.332	CCTTAGGCATCACAGCACAA	59.864
TRINITY_DN23988_c0_g2_i2_gene=TRINITY_DN23988_c0_g2_len=2661	(TG)10	CAAACCCCCAATCAAACACT	59.688	TTGGATCCCATCATGGTGTA	59.579
TRINITY_DN23996_c0_g1_i9_gene=TRINITY_DN23996_c0_g1_len=2555	(T)10	CCGAACGCAGAGTCAACAAT	61.236	GCTTTTGTGCCATTGTGATG	60.119
TRINITY_DN24000_c0_g1_i1_gene=TRINITY_DN24000_c0_g1_len=1007	(A)10	TATCGCTTGCCACCTACACA	60.28	TTCAGAAGGTCTACCGTGGG	60.103
TRINITY_DN24001_c0_g1_i2_gene=TRINITY_DN24001_c0_g1_len=1450	(TTC)6	TCTTCGCTGGTGAATTAGGG	60.206	CCAACGTTCTTCAGATATTCCC	59.835
TRINITY_DN24002_c0_g1_i3_gene=TRINITY_DN24002_c0_g1_len=490	(AT)6	GGAATTTCAGCCCAAACAAC	59.41	ACATCCCTCATCAAACCGTC	59.786
TRINITY_DN24002_c0_g1_i3_gene=TRINITY_DN24002_c0_g1_len=490	(AG)13	GGGAATTTGGTGAGGAGGTT	60.169	TGGACACACAAAACAACAAATACA	60.22
TRINITY_DN24002_c3_g2_i2_gene=TRINITY_DN24002_c3_g2_len=329	(AG)11	GGCAACAACGTTTTGGATTT	59.845	CAACAAACCCTCCTTTTCCTC	59.963
TRINITY_DN24002_c3_g3_i1_gene=TRINITY_DN24002_c3_g3_len=455	(TC)12	CCCTCTCTCTTTTGCTTTCG	59.191	GAGACTGAGCGAGCCATACC	59.981
TRINITY_DN24005_c1_g1_i5_gene=TRINITY_DN24005_c1_g1_len=1405	(TCC)6	CCACCACCATATCCAACTCC	60.05	GCTAGAAGGGCTCTGCTCAA	59.859
TRINITY_DN24006_c4_g2_i1_gene=TRINITY_DN24006_c4_g2_len=295	(A)10	AACAAATGGCACCAAAGAGG	59.971	TTTTGAATAGGCAGTCATTCCTT	59.175
TRINITY_DN24007_c1_g1_i4_gene=TRINITY_DN24007_c1_g1_len=1645	(AG)9	ACCCATGACGGTGAATTGAT	60.057	AATCGAGCCAAAATAGCACG	60.23
TRINITY_DN24016_c0_g1_i6_gene=TRINITY_DN24016_c0_g1_len=3927	(GCGT)12	AAGACTTAGAGCGAGCGAGC	59.129	CCATTGCCTATTTGCTTGAG	58.387
TRINITY_DN24016_c0_g1_i6_gene=TRINITY_DN24016_c0_g1_len=3927	(A)12	AATGGCGAAAGAGTCGAAAA	59.823	GGTCCGTATTGCTCTCAACC	59.556
TRINITY_DN24022_c1_g1_i1_gene=TRINITY_DN24022_c1_g1_len=1451	(TAGGGT)5	AGAGAGTCGGGAGAAAAGGC	59.957	TCCCACATCTCCCTCTACCA	60.465
TRINITY_DN24027_c0_g1_i1_gene=TRINITY_DN24027_c0_g1_len=687	(TGG)6	CAACAGCCACAACCTGAAGA	59.873	ACCCAACCCAACAAAACAAA	60.103
TRINITY_DN24027_c2_g1_i1_gene=TRINITY_DN24027_c2_g1_len=1164	(A)10	TAAACAACAGCAGCTCAGGG	59.072	TGCCATTTGGAGTGGACATA	59.924
TRINITY_DN24037_c1_g1_i3_gene=TRINITY_DN24037_c1_g1_len=2922	(T)11	CCAGCAACAGCTGAGCTAAA	59.366	CAAGAGCCTTCTTTTGGTGG	59.846
TRINITY_DN24037_c1_g1_i3_gene=TRINITY_DN24037_c1_g1_len=2922	(A)10	TCCCACTCAGAATAATGCCC	59.894	TGGTGAAGAACACAGCAAGG	59.873
TRINITY_DN24037_c1_g1_i3_gene=TRINITY_DN24037_c1_g1_len=2922	(A)12	TCCCTTGAATGCCTGAAGAC	60.195	TGTGCATTCAAACGTTGGTT	60.011
TRINITY_DN24050_c0_g1_i6_gene=TRINITY_DN24050_c0_g1_len=1349	(A)12	CCACAATCAAAGAATGCCAA	59.518	CTTGCAGAGTTGGGAAGACA	59.007
TRINITY_DN24051_c2_g2_i1_gene=TRINITY_DN24051_c2_g2_len=1045	(TC)11	TGCTTAAAGATTGCGTGTGC	60.021	GGTGTTGTCGAGTGGTGATG	60.005
TRINITY_DN24051_c4_g1_i2_gene=TRINITY_DN24051_c4_g1_len=802	(TC)12	CGAAGCTCTCTATCGGAACG	60.11	TGGGTTAAGAAAACCCTAATTTCA	60.101
TRINITY_DN24055_c1_g1_i1_gene=TRINITY_DN24055_c1_g1_len=1099	(AG)6	ATGTAACCGTCGTCCAGGAG	59.989	GAGGTTCCCAGATCCCTCTC	60.012
TRINITY_DN24055_c2_g10_i1_gene=TRINITY_DN24055_c2_g10_len=391	(CT)9	CGAATCCACAATCATTCCCT	59.75	AATCAATGGTGGACGATGCT	60.348
TRINITY_DN24055_c2_g4_i1_gene=TRINITY_DN24055_c2_g4_len=1794	(TG)8	GGCATGTGATCTTGGTGTTG	59.967	TCACCAGATGAGCGACAAAG	59.984
TRINITY_DN24055_c3_g2_i4_gene=TRINITY_DN24055_c3_g2_len=2401	(A)12	CAGCCAACTTTGAGAGCACA	60.175	ATCGCGGGTGATGAGAATAG	60.059
TRINITY_DN24055_c3_g2_i4_gene=TRINITY_DN24055_c3_g2_len=2401	(GA)11	TGGTGAATACCTTTGGTGATGA	60.227	ACCCTCACTCACACCTTTCC	59
TRINITY_DN24058_c2_g1_i8_gene=TRINITY_DN24058_c2_g1_len=2023	(A)10	ACATTCGCGTAAACCAGGTC	60	ATTCCGCCTGGGTATTTTCT	59.799
TRINITY_DN24059_c0_g1_i1_gene=TRINITY_DN24059_c0_g1_len=2884	(GAA)6	TGCGATTTCGAAGAAACAGA	59.542	AGCCTTTCAATTTCATTTCACA	58.742
TRINITY_DN24067_c0_g1_i1_gene=TRINITY_DN24067_c0_g1_len=933	(A)14	TCATAATCATTCACCCACCTAAAA	59.624	TCAGAATCCAGGTGCACAAA	60.24
TRINITY_DN24080_c0_g2_i1_gene=TRINITY_DN24080_c0_g2_len=1902	(GA)7	GGGGAGGTTGAGAAAGAGGA	60.565	TCTCTTTTCTCTTATTCCAAGAACAAC	59.756
TRINITY_DN24087_c1_g1_i2_gene=TRINITY_DN24087_c1_g1_len=1599	(AAG)6	AGAAGAGGTTGGTTGATGGG	58.989	GCCATCCTCTTTGACAAAACA	60.103
TRINITY_DN24087_c1_g2_i2_gene=TRINITY_DN24087_c1_g2_len=1215	(A)10	CACGGATCTCTTATCTCCGC	59.797	AAAATCGCTGTTTCAGGGTG	60.11
TRINITY_DN24088_c0_g3_i2_gene=TRINITY_DN24088_c0_g3_len=360	(T)15	CTTTTCGCGTAATTCCCTCA	60.202	TGAGCTGAACATCGAAGACC	58.96
TRINITY_DN24090_c0_g6_i1_gene=TRINITY_DN24090_c0_g6_len=1227	(GAA)5	ATGGCCGCATAAGAATCATC	59.891	TTGTGCATCAATCCTTTGCT	59.276
TRINITY_DN24091_c0_g1_i6_gene=TRINITY_DN24091_c0_g1_len=2886	(AC)7	ACCCAACTGGAACAGCAAAC	60.012	TCTTTGGACTGTGTTGCGAG	60.025
TRINITY_DN24091_c0_g1_i6_gene=TRINITY_DN24091_c0_g1_len=2886	(A)12	TCAACAACACCTCGCTCATC	59.837	GGATCCTGTTAAACTCGGCA	60.074
TRINITY_DN24099_c0_g1_i4_gene=TRINITY_DN24099_c0_g1_len=1085	(AG)9	CTAACTTTCAAAACGCCCCA	60.103	TCAAAGAAATCTGGCAAGGG	60.184
TRINITY_DN24100_c0_g1_i1_gene=TRINITY_DN24100_c0_g1_len=1446	(AG)8	CAATTTTGTGGTACGTGGGA	59.293	ATCCTTTGTCTTGTGCCACC	59.973
TRINITY_DN24102_c1_g3_i3_gene=TRINITY_DN24102_c1_g3_len=1799	(T)10	GCGTCCGCATAGATATTGGT	59.951	TGGCAAAACTATTTTGTTTTTCTTATT	59.782
TRINITY_DN24102_c1_g3_i3_gene=TRINITY_DN24102_c1_g3_len=1799	(TG)6	TGGGGTGGGTTAAGAAATCA	60.162	TCTATGCGGACGCACAAGTA	60.423
TRINITY_DN24103_c0_g2_i8_gene=TRINITY_DN24103_c0_g2_len=1698	(TA)7	CACGAGCCATTTCTTTGTGA	59.84	CCACAATGTAAAAAGACTCCATT	57.258
TRINITY_DN24104_c1_g1_i2_gene=TRINITY_DN24104_c1_g1_len=682	(CT)7	AAGCACCCTTATTCCATCAAA	58.569	GTTGGATCCGGGTTTTCTCT	60.306
TRINITY_DN24104_c1_g3_i1_gene=TRINITY_DN24104_c1_g3_len=369	(AG)7	TGTATTGTTGGATCCGGGTT	60.051	CACAATTCCTCTTCTTGCCTT	58.449
TRINITY_DN24105_c1_g1_i1_gene=TRINITY_DN24105_c1_g1_len=912	(A)10	TGAAAAGGGTCATTTTTCTGAG	58.352	TCAGTTCACCTCTTTCTACTTTGA	57.379
TRINITY_DN24109_c0_g4_i1_gene=TRINITY_DN24109_c0_g4_len=1828	(TGT)5	CATCAGGTGCTTCGATGAGA	59.942	ACTTCGAAAACCCACCCAAT	60.59
TRINITY_DN24110_c0_g3_i1_gene=TRINITY_DN24110_c0_g3_len=388	(A)12	TCCCATCACTCTCAAATCTCAA	59.67	AAAGCATGCGTCAATTTGTG	59.735
TRINITY_DN24125_c0_g8_i1_gene=TRINITY_DN24125_c0_g8_len=800	(T)14	TAACTCGACTCTGACGCCCT	60.012	ACGCAAAGCAAAAATGGAAA	60.599
TRINITY_DN24129_c0_g3_i1_gene=TRINITY_DN24129_c0_g3_len=2321	(T)10	GAGGTTTGGGAGTTTGGTGA	59.943	AAACAACACTTATCTTTAACCTCAAAA	58.075
TRINITY_DN24134_c0_g2_i1_gene=TRINITY_DN24134_c0_g2_len=221	(A)10	CCCATTATTCAAAAACAAGAATATC	57.293	TTGGGTCTTTCACAACATGC	59.547
TRINITY_DN24134_c0_g3_i2_gene=TRINITY_DN24134_c0_g3_len=2876	(A)10	AACCAACCACTTTTCAAATCG	58.983	GCTACTTTCGTTCTTTCTGCAA	58.834
TRINITY_DN24134_c1_g1_i4_gene=TRINITY_DN24134_c1_g1_len=6396	(A)14	AAATCAGAGCAATTGTGCCC	60.081	TTCTGAGGCTGTTGGAGGTT	59.844
TRINITY_DN24134_c1_g1_i4_gene=TRINITY_DN24134_c1_g1_len=6396	(AAT)8	TGCTCGATCTGGTTGTTGAG	59.984	GGAACCCAAACACGTCCTTA	59.83
TRINITY_DN24140_c0_g1_i1_gene=TRINITY_DN24140_c0_g1_len=1958	(TC)6	GCCGGGTTTTATCTCATGTC	59.391	TTTGATCGATTTGGGGATGT	60.133
TRINITY_DN24141_c0_g1_i7_gene=TRINITY_DN24141_c0_g1_len=1468	(A)10	TCTGTCGCCATCAACTCTTG	59.984	AAAAGACGTGGCTTCTTCCA	59.853
TRINITY_DN24141_c0_g3_i1_gene=TRINITY_DN24141_c0_g3_len=651	(A)10	CTAGAACATTGCAGCCACCA	59.864	TGATGTTCTTGTCGTTTTGTCA	59.22
TRINITY_DN24148_c0_g1_i1_gene=TRINITY_DN24148_c0_g1_len=285	(A)10	TGAGAATGAAACAACCAAGTCAA	59.64	GGTTTCTGAAGCTCAGGTAATG	58.009
TRINITY_DN24148_c1_g1_i4_gene=TRINITY_DN24148_c1_g1_len=2918	(A)13	TGGGACTCCATTGAATTTGTC	59.782	GGTTTTTGGAATGGCCTACA	59.801
TRINITY_DN24148_c1_g2_i5_gene=TRINITY_DN24148_c1_g2_len=2311	(TCA)6	CTTACAGCAGCACCCACTGA	60.049	ATTTTCATGGCAAATGGAGG	59.762
TRINITY_DN24159_c2_g1_i1_gene=TRINITY_DN24159_c2_g1_len=977	(GTT)6	TCCATGGTAGGTTGGGTGTT	60.088	TTTTTCTTTCCCTACTCCTCCC	59.946
TRINITY_DN24162_c1_g1_i1_gene=TRINITY_DN24162_c1_g1_len=905	(AAGCC)5	TGGACTAGAGGACACAACAGTCA	59.818	CCAAATGATGACATGGTGGA	60.177
TRINITY_DN24174_c2_g1_i3_gene=TRINITY_DN24174_c2_g1_len=2515	(A)10	AAACGCAGAATTGAAATGGC	60.081	TTGGAGGGTAGTGATTGTTGG	59.838
TRINITY_DN24177_c3_g2_i1_gene=TRINITY_DN24177_c3_g2_len=655	(A)12	ACAAAACCAGCTTCGAGGAA	59.853	ATGATTTTGCAGCCCTTTTG	60.074
TRINITY_DN24178_c2_g1_i1_gene=TRINITY_DN24178_c2_g1_len=1249	(T)10	CAATGCCACGTCAGCTTCTA	60.011	GCAGAGTGCTATTCAAGGTGC	60.037
TRINITY_DN24178_c3_g1_i1_gene=TRINITY_DN24178_c3_g1_len=665	(ACA)5	TGCTAGGAGTCGAATGGCTT	59.978	GGTGGGTCTTCAACATTGCT	59.973
TRINITY_DN24178_c4_g2_i1_gene=TRINITY_DN24178_c4_g2_len=1221	(AG)6	GGCAGGTTCCATTGTGATTT	59.797	GTTACTGCATTGGGTGGCTT	60
TRINITY_DN24178_c4_g2_i1_gene=TRINITY_DN24178_c4_g2_len=1221	(TA)7	GGCAGGTTCCATTGTGATTT	59.797	GTTACTGCATTGGGTGGCTT	60
TRINITY_DN24178_c4_g2_i1_gene=TRINITY_DN24178_c4_g2_len=1221	(TTG)5	TCTTCAGGTGCAGGAAGGTT	59.844	TAAGGGAAATCAATACGGCG	59.922
TRINITY_DN24178_c4_g3_i1_gene=TRINITY_DN24178_c4_g3_len=509	(AG)7	CCAATATCAGGGGACACACA	59.215	AAAGAGAGGCACAAGGGGTT	60.11
TRINITY_DN24178_c5_g1_i4_gene=TRINITY_DN24178_c5_g1_len=1901	(TAG)8	TGATTTGAGGTTGAACTCGG	58.695	TGTTGGTGGTGGCTACAGAA	60.152
TRINITY_DN24178_c5_g1_i4_gene=TRINITY_DN24178_c5_g1_len=1901	(A)13	TGTCACACCTTTAACTTTCCCA	59.512	TGGTTCATCAGTCACTTCTCTCA	59.899
TRINITY_DN24181_c2_g1_i5_gene=TRINITY_DN24181_c2_g1_len=2451	(AG)8	CACAAATTTTGAACATCCAATCA	59.728	CCTCACCACCCATAACCAAC	60.088
TRINITY_DN24182_c0_g3_i1_gene=TRINITY_DN24182_c0_g3_len=1514	(A)13	CAAACAGAATCCCAGCATCA	59.648	GGACGCACCGTAAGGATAAA	59.96
TRINITY_DN24183_c0_g1_i2_gene=TRINITY_DN24183_c0_g1_len=3448	(A)10	AAAAACCCAACACGATCAATG	59.716	TCAGCATGTTCCATCTTTGG	59.648
TRINITY_DN24183_c0_g1_i2_gene=TRINITY_DN24183_c0_g1_len=3448	(T)10	TCTTGCAAAATGGTTGCTTTT	59.75	CAATTCTAAGGCCTCCCACA	60.066
TRINITY_DN24186_c0_g1_i6_gene=TRINITY_DN24186_c0_g1_len=1942	(A)11	AACTTGACCGCATTGAGACC	60.119	CTGCCAGTTTTTCCCTTCAC	59.711
TRINITY_DN24188_c0_g1_i7_gene=TRINITY_DN24188_c0_g1_len=6624	(AG)7	AGCCCCGTTTTCTAGGGTTA	59.96	CTTCCAACAGCCTGCAAAA	59.973
TRINITY_DN24188_c0_g1_i7_gene=TRINITY_DN24188_c0_g1_len=6624	(TA)7	CTCCTTTTCGCACAGTCTCC	59.989	TCTGATGGTCAATGGGTTCA	59.893
TRINITY_DN24189_c0_g1_i1_gene=TRINITY_DN24189_c0_g1_len=4084	(T)10	TCCTTCTGCACCCAAAATTC	60.051	TTGTTTTGTTGAACCGACCC	60.766
TRINITY_DN24203_c3_g1_i3_gene=TRINITY_DN24203_c3_g1_len=563	(T)10	ATCAGCTTCGTTCCACCATC	60.081	CTCTCACCCATGAAAATGACAG	59.592
TRINITY_DN24213_c1_g1_i3_gene=TRINITY_DN24213_c1_g1_len=380	(GA)13	GATACATCGTCGGATGACCC	60.166	TCAATTCATAAACCCACGCA	59.93
TRINITY_DN24213_c2_g1_i1_gene=TRINITY_DN24213_c2_g1_len=956	(AG)7	AACACCAGCCATTGTTGTGA	60.008	TTCCTCTCCTTCTGCTTTGG	59.545
TRINITY_DN24213_c3_g1_i1_gene=TRINITY_DN24213_c3_g1_len=2249	(T)11	CAGGGGTAGCACAGCAATTT	60.132	CAGCTTCGATCAAACCCATT	60.074
TRINITY_DN24213_c3_g3_i2_gene=TRINITY_DN24213_c3_g3_len=826	(A)17	GCACGCACAGGTAACAGCTA	60.081	TTCAGGTTTTTGTTTCTATTTTTGAA	59.528
TRINITY_DN24215_c3_g5_i2_gene=TRINITY_DN24215_c3_g5_len=792	(A)10	TACTTCGACTCGCTGCTCTG	59.49	TCATTGTCGGTGCTGTGTTT	60.16
TRINITY_DN24215_c3_g7_i2_gene=TRINITY_DN24215_c3_g7_len=1103	(TTA)7	AAGCGTTACCCGGAGATTTT	59.966	CCAAACCCTCTCCATTTTCTC	59.926
TRINITY_DN24218_c0_g1_i1_gene=TRINITY_DN24218_c0_g1_len=326	(A)11	CTGTGTGGCCTGGGTAGATT	59.989	TAATCTTGCTGGGAATTGGG	59.894
TRINITY_DN24218_c1_g2_i1_gene=TRINITY_DN24218_c1_g2_len=2130	(AGA)5	AGGAGCACGAGAATGAAGGA	59.95	CCACGGACTCAACTCAATCA	59.676
TRINITY_DN24218_c1_g2_i1_gene=TRINITY_DN24218_c1_g2_len=2130	(AC)7	TCCATGCTTGCATGATTTTC	59.628	AAAGAGGCTGTCAAGTTGGG	59.328
TRINITY_DN24219_c0_g2_i2_gene=TRINITY_DN24219_c0_g2_len=3423	(A)10	GCCAGGGTTGTGAAAACATAA	59.853	TGATGGCATTCAAAGGAACA	60.049
TRINITY_DN24224_c0_g1_i4_gene=TRINITY_DN24224_c0_g1_len=2502	(AT)6	TCTGCTTCCGGATCTTCAAC	60.34	ACCCCTCCAAAACCCACTAA	60.581
TRINITY_DN24231_c0_g1_i3_gene=TRINITY_DN24231_c0_g1_len=2308	(A)10	AAAGCCATTGATGAGTTGGG	59.933	ATGTTATCGAACGGGTGGAA	60.192
TRINITY_DN24241_c0_g6_i1_gene=TRINITY_DN24241_c0_g6_len=753	(A)11	GAAGTTGGGCACGTGAGATT	60.119	GCTGGTTGACCTACTGTCTTCC	60.175
TRINITY_DN24242_c0_g2_i3_gene=TRINITY_DN24242_c0_g2_len=2477	(AG)6	ACCCACCAGACATTGAGAGG	59.962	TGCGTTTCATTTTTCAACCA	60.088
TRINITY_DN24243_c2_g2_i1_gene=TRINITY_DN24243_c2_g2_len=382	(GAA)5	GAGTCCTCCAGTGAGCAAGC	60.143	TTGTGGAGTGTGTTCCCAAA	59.976
TRINITY_DN24244_c1_g1_i1_gene=TRINITY_DN24244_c1_g1_len=626	(AG)10	GGTTGTGGTTGGTGTGTTTG	59.745	GCTTTCTCTTCCCTCCCAAT	59.651
TRINITY_DN24244_c2_g2_i1_gene=TRINITY_DN24244_c2_g2_len=1021	(GA)10	CGGCACTAATCCCTGACAGT	60.134	AGGTTGAAGGCCCAGAGAAT	60.074
TRINITY_DN24244_c2_g3_i2_gene=TRINITY_DN24244_c2_g3_len=1021	(CT)9	CCCAGAACCTTCACATCTTCA	60.096	GGGCGATGAAAGATTTGTGT	59.939
TRINITY_DN24245_c0_g4_i1_gene=TRINITY_DN24245_c0_g4_len=236	(ACA)8	GATTCAATCTCAGGATTGCCA	60.029	ACCCACGTCAAGTTTCAAGG	60.005
TRINITY_DN24247_c6_g1_i3_gene=TRINITY_DN24247_c6_g1_len=811	(A)10	ATAGGCCCACAACTCCCATT	60.578	TTCGATTTCTTTCGGGTGAG	60.184
TRINITY_DN24249_c0_g1_i2_gene=TRINITY_DN24249_c0_g1_len=3464	(T)12	ACTTGGACCTGAACCGTCAC	60.009	TGTCGCACCATTTTCTCAAC	59.697
TRINITY_DN24250_c2_g5_i1_gene=TRINITY_DN24250_c2_g5_len=594	(AT)11	TCATAGAAAAGTACAAATACAGATCCA	57.585	TTTGGTGGCTGTTTGTTTCA	60.127
TRINITY_DN24257_c3_g2_i10_gene=TRINITY_DN24257_c3_g2_len=3495	(A)10	AACATTCCTTTCCTCTGCGA	59.813	TGGCTCTTTGGAGAAATCAA	58.422
TRINITY_DN24257_c3_g2_i10_gene=TRINITY_DN24257_c3_g2_len=3495	(A)11	TAATGGGGGAAATTGTGCAT	60.016	CAAGGGACCAAGGGAAAAGT	60.332
TRINITY_DN24257_c3_g2_i10_gene=TRINITY_DN24257_c3_g2_len=3495	(A)11	TCCCAGCATCATTACTTCCA	59.075	ATGCACAATTTCCCCCATTA	60.016
TRINITY_DN24258_c0_g1_i5_gene=TRINITY_DN24258_c0_g1_len=1872	(A)11	TGTCAAAACATCCCTTGTTCA	59.01	TGCTACACTTGCACCAGCTT	59.664
TRINITY_DN24259_c0_g1_i10_gene=TRINITY_DN24259_c0_g1_len=2487	(A)10	AGCCCCTCCTTTTCCAAATA	59.903	TGGTCTCAAATGTGGTGGAA	59.935
TRINITY_DN24271_c0_g2_i1_gene=TRINITY_DN24271_c0_g2_len=2147	(T)10	GACCCCATTCATGACGTTTT	59.653	GTCCCCACTCCACACAAACT	59.859
TRINITY_DN24272_c0_g1_i1_gene=TRINITY_DN24272_c0_g1_len=256	(TG)8	GGGTAGGTCTCAGATACGCC	58.622	GCGCATGTTAGCACTCGTTA	60.044
TRINITY_DN24272_c2_g3_i1_gene=TRINITY_DN24272_c2_g3_len=341	(CT)9	CTGGCCAACTCAACTTCCAT	60.111	AATGAAAGCCAAATTCCACG	59.938
TRINITY_DN24272_c3_g1_i1_gene=TRINITY_DN24272_c3_g1_len=442	(GA)8	CATTTATCGTTTCCGTGCCT	59.96	CTCGAACGACGCCTAAAAAC	59.883
TRINITY_DN24272_c3_g3_i2_gene=TRINITY_DN24272_c3_g3_len=320	(GA)6	CGAAGAAGGTTGAGACGGAG	59.982	TGAATGGCACATCACCACTT	59.967
TRINITY_DN24272_c4_g1_i1_gene=TRINITY_DN24272_c4_g1_len=787	(GA)9	GATTGACCCGTTTTCTTGGA	59.91	TACACGCTCCACGTCATCAT	60.144
TRINITY_DN24283_c0_g1_i1_gene=TRINITY_DN24283_c0_g1_len=1341	(T)10	AAGCATGGGGATTTTGAGTG	59.933	TGAAACTTAGGATTCATTTAGCATCA	60.354
TRINITY_DN24297_c0_g1_i9_gene=TRINITY_DN24297_c0_g1_len=753	(AAT)8	GGGTAGCCTTACGCAAATCA	60.096	TGCTTTCCGTTCGCTTTAGT	60.018
TRINITY_DN24298_c0_g1_i4_gene=TRINITY_DN24298_c0_g1_len=1494	(A)10	TGGAATCGTCTGTTATAAACACAAAG	60.631	CGACCGAGCTTCTTATAGCTG	59.28
TRINITY_DN24299_c1_g3_i1_gene=TRINITY_DN24299_c1_g3_len=329	(A)10	GATGTACCAACCGAAATCGC	60.339	CCTTAAAGCCATTGCCTGTG	60.628
TRINITY_DN24303_c0_g1_i2_gene=TRINITY_DN24303_c0_g1_len=2389	(AGG)5	TGGGAGCAGAGAAAGTGGTT	59.844	AACCCATCATCTTCACAGCC	59.934
TRINITY_DN24304_c1_g1_i5_gene=TRINITY_DN24304_c1_g1_len=2216	(TC)7	CAAGGAAGATTTCAAGGGGC	60.929	ATTTGCCGACCCAGTGTTAG	59.993
TRINITY_DN24308_c2_g1_i7_gene=TRINITY_DN24308_c2_g1_len=3419	(GAA)6	GAACATCTTGCTCCATCCGT	60.081	AGCAAAGATTCCAAGGCTCA	59.955
TRINITY_DN24312_c0_g1_i1_gene=TRINITY_DN24312_c0_g1_len=2286	(A)17	CGATTTCTCGGATAACCCAA	59.894	CCTTCCACGATCCATTCAAA	60.832
TRINITY_DN24314_c0_g2_i1_gene=TRINITY_DN24314_c0_g2_len=341	(A)10	TATCTGGCGGGGAAGTTATG	59.916	ATCAAGAAAATGGGTGCGTC	59.939
TRINITY_DN24316_c0_g1_i3_gene=TRINITY_DN24316_c0_g1_len=2485	(A)12	GGTTTCTGGAATCGAGGACA	60.05	TGATCTGTGCCGTGAGTCAT	60.279
TRINITY_DN24317_c0_g1_i1_gene=TRINITY_DN24317_c0_g1_len=2663	(ATT)7	TCTGAAGAAGCAAGGCCAAT	59.955	GACGATTACATGGACTGGGG	60.195
TRINITY_DN24318_c0_g1_i1_gene=TRINITY_DN24318_c0_g1_len=1850	(TGG)5	ATGGATGGCTTTGAGATTCG	60.036	CGACCATGTCTGCTTCTTCA	59.984
TRINITY_DN24321_c1_g1_i2_gene=TRINITY_DN24321_c1_g1_len=757	(A)10	GTGAAACCATAACCATGCCC	60.059	GGATGGTTGGCAATTCTGTT	59.797
TRINITY_DN24321_c3_g1_i1_gene=TRINITY_DN24321_c3_g1_len=576	(CT)8	GACCAAGAATCTGGGCAAAA	60.051	TTGCAGAGGATGGAGATTGA	59.322
TRINITY_DN24321_c5_g1_i1_gene=TRINITY_DN24321_c5_g1_len=880	(AG)20	AAATCTCGGGCCAACTGTTT	60.856	GCGGGGTTGAGAAGTGAGTA	60.255
TRINITY_DN24325_c0_g4_i3_gene=TRINITY_DN24325_c0_g4_len=4180	(A)10	CAAGAGCAGGACACAACCAA	59.873	GGACAATGCAGGATGGAACT	59.934
TRINITY_DN24327_c1_g3_i4_gene=TRINITY_DN24327_c1_g3_len=4402	(T)10	ATGGGTGCCTCAATTTCATA	57.887	GGCAGTTGCAATGGTTTCTT	60.118
TRINITY_DN24329_c2_g3_i1_gene=TRINITY_DN24329_c2_g3_len=718	(T)11	CGCCTCACTAGTCCCCATAA	60.088	AACCTCGACTACGTTGTGTGAC	59.186
TRINITY_DN24333_c3_g3_i4_gene=TRINITY_DN24333_c3_g3_len=1141	(TCA)10	TGCAAAACCATCTTCGCATA	60.215	AAGCTTAACGACGAGACGGA	60.015
TRINITY_DN24336_c1_g2_i3_gene=TRINITY_DN24336_c1_g2_len=1841	(A)10	ATACCCCTAAGGTGTGGCAA	59.312	TTCTGGTTTTACACGACCTTGTT	59.955
TRINITY_DN24336_c2_g1_i5_gene=TRINITY_DN24336_c2_g1_len=1821	(T)10	GCGCAAACTTCCATCTTCTT	59.457	TATCTCTGTGAGGTTCCCCG	60.065
TRINITY_DN24341_c0_g2_i3_gene=TRINITY_DN24341_c0_g2_len=4016	(ATA)5	AATTGCACTTTCGGATCACC	59.939	TGTATTTGTTGATTCACACACGTT	59.357
TRINITY_DN24341_c0_g4_i1_gene=TRINITY_DN24341_c0_g4_len=653	(A)10	GATCCGAAAAAGAGATGCCA	60.155	GCAGCTGAATAGAGGGCAAC	59.985
TRINITY_DN24343_c1_g2_i1_gene=TRINITY_DN24343_c1_g2_len=1169	(T)10	TGGTTCTTTTCTCTGCACTCC	59.463	TTTGAGCTATGAAGCACGGA	59.566
TRINITY_DN24345_c2_g2_i1_gene=TRINITY_DN24345_c2_g2_len=1098	(A)13	CCGCCGCTATTGACTACTCT	59.499	CCTCATCTCCAATCTGAAAACC	59.94
TRINITY_DN24348_c0_g1_i2_gene=TRINITY_DN24348_c0_g1_len=2604	(AG)7	GGCAAAATGAGGCATAGCAT	60.067	TCCTCTTACATTCATTCCTTCCA	59.952
TRINITY_DN24354_c0_g2_i1_gene=TRINITY_DN24354_c0_g2_len=442	(GTT)5	ACGAATGCTCGACGAAGTTT	59.882	CACCACCTACCGTCCACTTT	59.884
TRINITY_DN24355_c0_g1_i6_gene=TRINITY_DN24355_c0_g1_len=714	(TAT)5	ATGTGAGTTGGTGGGGTCAT	60.096	AGTTGTTCCTTGCTGTCCTCA	59.899
TRINITY_DN24356_c2_g1_i1_gene=TRINITY_DN24356_c2_g1_len=246	(A)14	CCTAGTTTCCCCGCTACAGA	59.331	GGGTTTGTAAGTAGGGTTTGATCTT	60.053
TRINITY_DN24362_c0_g2_i1_gene=TRINITY_DN24362_c0_g2_len=411	(A)13	CAGAAGCCATACACTGTTGACC	59.662	TGTCCTTGTTGATGGCAAAG	59.691
TRINITY_DN24362_c0_g4_i1_gene=TRINITY_DN24362_c0_g4_len=1609	(A)10	ACAAAGCAATCAAGCCGAGT	59.882	TGGTTTATTGGTGCCTGAAA	59.013
TRINITY_DN24364_c3_g1_i1_gene=TRINITY_DN24364_c3_g1_len=1363	(GA)6	ATTGGTGGTGAGCAAAGGAC	59.973	CCTCACCACTATCTGACACACA	58.648
TRINITY_DN24364_c3_g1_i1_gene=TRINITY_DN24364_c3_g1_len=1363	(GAA)5	CTCTTCAAAAGGGGAGAGGC	60.319	GTCCTTTGCTCACCACCAAT	59.973
TRINITY_DN24364_c3_g1_i1_gene=TRINITY_DN24364_c3_g1_len=1363	(TGA)5	GAGGTTTGCCAACAACAGGT	60.012	ATGGTGAAATCCAAATCCCA	59.991
TRINITY_DN24371_c3_g1_i1_gene=TRINITY_DN24371_c3_g1_len=355	(A)10	TGAGCGAGTCTACCAACCAA	59.44	CGGCAAGTTTCGGTAAATCT	59.225
TRINITY_DN24372_c0_g1_i2_gene=TRINITY_DN24372_c0_g1_len=3453	(ATC)7	TCAAACCACCAAAAACAGCA	60.127	AGTCACAGTCAGACGGAGGG	60.306
TRINITY_DN24381_c0_g3_i3_gene=TRINITY_DN24381_c0_g3_len=4592	(AT)6	CTGAGATTTGATGGTCGTCG	59.241	TTTATGGCGGTAAACTGGCT	59.609
TRINITY_DN24382_c0_g1_i1_gene=TRINITY_DN24382_c0_g1_len=267	(A)11	AAGCACAGACATCGGAAACA	59.293	GTCAGTGTGGGTGTCGTGTC	60.053
TRINITY_DN24385_c2_g8_i2_gene=TRINITY_DN24385_c2_g8_len=1657	(A)10	CGACATTTCCCTCATCTTCTG	59.679	GTGGTGGATTTGGTAAACGG	60.088
TRINITY_DN24385_c2_g8_i2_gene=TRINITY_DN24385_c2_g8_len=1657	(GTT)6	TAGCAGCGGAGGAGTAGGAA	60.11	AGAAAAGCACCTCTACCGCA	60.015
TRINITY_DN24386_c0_g1_i4_gene=TRINITY_DN24386_c0_g1_len=2077	(T)10	ACCTTGCATCGGATCTGTCT	59.685	GGATTAGTCTCTGCAGTTGCG	60.03
TRINITY_DN24389_c0_g1_i3_gene=TRINITY_DN24389_c0_g1_len=3452	(CT)7	CCACAGTGCGGTCTGTTTAG	59.36	CATCGGTTAAATTCATGGTTGA	59.699
TRINITY_DN24390_c0_g1_i2_gene=TRINITY_DN24390_c0_g1_len=926	(A)14	GAAATTCCTGCCACTACGCT	59.34	TGGATTGTGATTTTGTGGGA	59.75
TRINITY_DN24391_c2_g1_i14_gene=TRINITY_DN24391_c2_g1_len=3901	(CAACCA)8	GGCATTGCCCTTATCAAAAA	59.907	AATTGATGGAGGTCTGGTGG	59.779
TRINITY_DN24401_c0_g1_i14_gene=TRINITY_DN24401_c0_g1_len=2973	(A)12	CGGCTTAGCAGGAAAACTTG	60.011	CTGCAGGTTGAAGTTGCTCA	60.175
TRINITY_DN24402_c0_g1_i1_gene=TRINITY_DN24402_c0_g1_len=1983	(A)10	CCATGTCACCCCATAACTCC	60.05	TTGGTGGATGAGATGACGAA	60.048
TRINITY_DN24406_c0_g1_i1_gene=TRINITY_DN24406_c0_g1_len=2014	(A)10	TCAAAAACTCAGCCCATGAA	59.247	CGGGACACTTCACCAATCTT	59.966
TRINITY_DN24413_c1_g3_i6_gene=TRINITY_DN24413_c1_g3_len=1058	(A)11	ATCCCTGTCCATCTGTCCAC	59.774	GTTCTTTCGAGCGGAGGTTT	60.743
TRINITY_DN24423_c0_g2_i8_gene=TRINITY_DN24423_c0_g2_len=1904	(T)10	CTCAGTTGGTAGAGCGGAGG	60.005	AAGGAGATGCTCGTGCTCAT	59.981
TRINITY_DN24426_c1_g1_i7_gene=TRINITY_DN24426_c1_g1_len=2157	(A)11	CGGCACAACTACAACAACAA	58.244	TCAGGCCATTAGAGAAGCTCA	60.103
TRINITY_DN24426_c2_g1_i5_gene=TRINITY_DN24426_c2_g1_len=2856	(A)10	TGAACTTGGCCATTTTCCAT	60.309	GCGAGAGAAATTGTATGGGG	59.528
TRINITY_DN24426_c2_g3_i2_gene=TRINITY_DN24426_c2_g3_len=923	(GTT)5	AAAGTTGGTCCATGTAGCCG	59.993	CCATGGTGGATTTTGGTTTC	60.029
TRINITY_DN24426_c2_g3_i2_gene=TRINITY_DN24426_c2_g3_len=923	(A)12	CCAGTCAAGAAGGAAGCCAG	59.982	CTTACGGGCAACGACCTAAC	59.632
TRINITY_DN24426_c2_g5_i1_gene=TRINITY_DN24426_c2_g5_len=867	(TTC)5	CAAAACACAACCACAGCCAC	60.049	GTTGAGAGATGAAGCGAGGG	59.95
TRINITY_DN24432_c2_g3_i1_gene=TRINITY_DN24432_c2_g3_len=220	(A)15	GGAGGCAAACCAGAGTGATG	60.656	GAGACAATTCTTCGCCGTGT	60.263
TRINITY_DN24432_c2_g4_i1_gene=TRINITY_DN24432_c2_g4_len=251	(A)10	TCTGCAAACCGTGTCATCAT	60.12	GTGGCGGTGAACAGTAGTCC	60.577
TRINITY_DN24432_c2_g5_i1_gene=TRINITY_DN24432_c2_g5_len=357	(A)10	ATCATTTCGGTTTGCCTCAC	59.939	CTGGAACCAGATGAGGAAGG	59.649
TRINITY_DN24439_c0_g1_i6_gene=TRINITY_DN24439_c0_g1_len=1826	(A)12	CAAAGCAAACTAAATGGAGGC	58.888	AATCACTCACCATCCTTGCC	59.934
TRINITY_DN24447_c0_g2_i3_gene=TRINITY_DN24447_c0_g2_len=1478	(A)10	TGCTTAATTTTTAGGCCATTCAA	59.984	ACTTTAGCATCCAGGGAGGG	60.455
TRINITY_DN24448_c0_g1_i3_gene=TRINITY_DN24448_c0_g1_len=2640	(T)10	GGATTGGAGATTTGCGATGT	59.9	AACATTCATAAACTCATGGGGG	59.945
TRINITY_DN24450_c0_g4_i2_gene=TRINITY_DN24450_c0_g4_len=2848	(AT)8	CTTCTGGAGAGGCATCGAAC	59.95	AGCTGCTACTTGGACTCGGA	60.156
TRINITY_DN24459_c0_g2_i3_gene=TRINITY_DN24459_c0_g2_len=1494	(CTC)5	CCGCCATTCGGTGTATTTAG	60.335	GCCAAAAACTGCAACCATTT	59.982
TRINITY_DN24459_c0_g2_i3_gene=TRINITY_DN24459_c0_g2_len=1494	(TTTGGA)5	GTGAAGGAGCAGAGATTCGG	59.95	ATTGATGACGGCGAAAGAAC	60.081
TRINITY_DN24464_c0_g1_i1_gene=TRINITY_DN24464_c0_g1_len=338	(GTT)6	AGCCATCAAATGAATCGACA	59.079	GCCAACACAATCACAACGAC	60.016
TRINITY_DN24464_c1_g1_i1_gene=TRINITY_DN24464_c1_g1_len=511	(ACA)5	CACCGCTTCCATAACAACCT	59.993	CGATTTGCTGGAAGGAGAAG	59.948
TRINITY_DN24464_c1_g2_i1_gene=TRINITY_DN24464_c1_g2_len=1394	(A)13	ATCAGCAACAATGCCAACAA	60.119	AGAAGCTCTTGCTTGAACGC	59.904
TRINITY_DN24464_c1_g2_i1_gene=TRINITY_DN24464_c1_g2_len=1394	(TGT)6	TAAGAGGTGTAACCGGGCTG	60.125	TCCACCTCGAACAACATCAA	60.088
TRINITY_DN24464_c1_g4_i1_gene=TRINITY_DN24464_c1_g4_len=767	(TGT)5	ACGAAAATGAGTTGGAACCG	59.971	TACTTTGCTCCCTTTGACCC	59.17
TRINITY_DN24467_c1_g3_i1_gene=TRINITY_DN24467_c1_g3_len=1961	(A)11	GACAATTTCGACCACAACCA	59.394	GCGGTGGTTTGATTCTGTTT	59.978
TRINITY_DN24467_c1_g3_i1_gene=TRINITY_DN24467_c1_g3_len=1961	(ACA)6	TGACCATCTACGTAGCACCAA	59.209	CGAACGTCGTGTTCCTTTTT	60.147
TRINITY_DN24468_c1_g2_i5_gene=TRINITY_DN24468_c1_g2_len=2293	(GA)6	AAAATTTCGGTCAGGGGTTC	60.166	GATCCCTTCATTCAGCCAAA	60.014
TRINITY_DN24468_c1_g3_i2_gene=TRINITY_DN24468_c1_g3_len=2638	(TA)8	GATCTCTGGGGAGGAGGAAC	60.012	AACCCTCGTACCGTGTCTTG	60.028
TRINITY_DN24469_c0_g1_i3_gene=TRINITY_DN24469_c0_g1_len=2091	(GAA)5	AACTCGAGCGCATTTAGCAG	60.678	CAAGTATTTGCGTGCTGTGC	60.467
TRINITY_DN24471_c0_g1_i7_gene=TRINITY_DN24471_c0_g1_len=1419	(A)12	GAGAAGCAACATCTAAGCAGCA	59.797	TGCTTTGGAATGCAATGTTT	59.161
TRINITY_DN24471_c0_g1_i7_gene=TRINITY_DN24471_c0_g1_len=1419	(AG)6	TGATTAGGGTTTGTTTGCGG	60.856	GCAGAGAAAATGGTTCCCAA	60.051
TRINITY_DN24476_c1_g6_i1_gene=TRINITY_DN24476_c1_g6_len=648	(GGT)5	GGTTGGAATGCGAATGATG	59.875	AAACTCCACCAACCAGCAAC	60.012
TRINITY_DN24478_c0_g1_i7_gene=TRINITY_DN24478_c0_g1_len=4543	(GCT)6	AGTCCGAAAAGCCAAAAAGG	60.584	GTTGGGACTAGCGACAGCTC	60.02
TRINITY_DN24481_c0_g1_i1_gene=TRINITY_DN24481_c0_g1_len=1894	(T)14	TCCCGTTTCAAGGAAAATTG	59.91	CATCAACGTAATCTTCGCCA	59.688
TRINITY_DN24482_c0_g2_i3_gene=TRINITY_DN24482_c0_g2_len=1217	(A)21	CCTGCAACCAAAATTTTTCA	58.649	GGATGCGGAGTTTGTTAAGG	59.569
TRINITY_DN24488_c7_g2_i1_gene=TRINITY_DN24488_c7_g2_len=269	(T)12	ACCATCGGCTCTGATACCAC	59.957	CACTCTTTTATCCTTCTACGCAAA	59.047
TRINITY_DN24489_c0_g1_i1_gene=TRINITY_DN24489_c0_g1_len=2920	(TCA)5	CTGCAAAGCTTCCTCGTCTT	59.757	CAACTCCAAGAAGGCTCCTG	59.982
TRINITY_DN24489_c0_g1_i1_gene=TRINITY_DN24489_c0_g1_len=2920	(T)10	TCACGACAGCTTCTGCTCTT	58.909	TGAATCGTTCAATTTTGCCA	60.051
TRINITY_DN24489_c0_g1_i1_gene=TRINITY_DN24489_c0_g1_len=2920	(A)13	TGCTCAGTCTCCATTTCGTG	59.984	AAGAGCAGAAGCTGTCGTGA	58.909
TRINITY_DN24491_c0_g1_i2_gene=TRINITY_DN24491_c0_g1_len=2117	(T)17	GGAAGACTCGCTGTTTCTGG	59.989	CGAATTGGGCTAGTAAGGAAA	58.397
TRINITY_DN24492_c0_g1_i1_gene=TRINITY_DN24492_c0_g1_len=448	(A)10	CAAGGCAAGACAACATAATTGG	59.514	TCACGCAAAACAGCGTAATC	59.879
TRINITY_DN24505_c0_g5_i1_gene=TRINITY_DN24505_c0_g5_len=971	(AG)6	TGGGGTTTGTAGGTTTCGAG	59.964	CAAGCATGCAAACAGATTATTG	58.38
TRINITY_DN24507_c1_g1_i4_gene=TRINITY_DN24507_c1_g1_len=3145	(GTT)7	CGAGGTTGGTTTAGTTGGGA	59.964	TTTTCCTTCTTCCTCCGACA	59.784
TRINITY_DN24507_c1_g1_i4_gene=TRINITY_DN24507_c1_g1_len=3145	(TAC)5	GGCAGCCTACAGAGATTGCT	59.603	CCCATGTAGAAACTCGATCTCA	59.195
TRINITY_DN24508_c1_g5_i2_gene=TRINITY_DN24508_c1_g5_len=1875	(A)13	CCTGAAAACAGAGAATGGGG	59.521	CCAAAGTCCGTGATTGGAGT	59.966
TRINITY_DN24509_c0_g1_i10_gene=TRINITY_DN24509_c0_g1_len=1646	(AG)6	AAAAGGCAAGAAGGGGATTG	60.423	GAGGACTGCTTTTGGGTCTG	59.844
TRINITY_DN24510_c0_g1_i6_gene=TRINITY_DN24510_c0_g1_len=3237	(A)10	CACCCATACCATTTTCATCG	58.695	TCATGGTTGGAAATTGACCC	60.56
TRINITY_DN24510_c0_g1_i6_gene=TRINITY_DN24510_c0_g1_len=3237	(A)10	CCCCACAATCAACAATCACTC	60.225	GCTTCTGGTTGCTCCACTTC	59.997
TRINITY_DN24510_c0_g1_i6_gene=TRINITY_DN24510_c0_g1_len=3237	(T)10	TGACCAGCCAAAGAGTTTGA	59.415	GGATACAAAACACAAAACAATGGA	60.023
TRINITY_DN24514_c1_g4_i2_gene=TRINITY_DN24514_c1_g4_len=1489	(A)10	GGTGTTGGTGATTTTGAAGTGA	59.875	GTTGCAGATTCGACAACATCA	59.713
TRINITY_DN24517_c0_g2_i1_gene=TRINITY_DN24517_c0_g2_len=3137	(A)11	AAAACAAGTGTCGGGGAGTG	60.005	TTGAAATACTCGAGTCTGGGAG	58.461
TRINITY_DN24517_c0_g2_i1_gene=TRINITY_DN24517_c0_g2_len=3137	(ACA)5	CCATGTACTCCGGGATCAAT	59.629	CAAGAAATGTCCACATCCCC	60.173
TRINITY_DN24518_c0_g1_i3_gene=TRINITY_DN24518_c0_g1_len=1558	(A)28	CCGTATCTCAACGCACTCAA	59.864	TGCCAGAGTTAGGGTTTTGAA	59.733
TRINITY_DN24522_c0_g1_i3_gene=TRINITY_DN24522_c0_g1_len=2106	(TTC)6	CAACCACCTCTGGTTCTGCT	60.298	GCGAAACACCACTTCCAAAT	59.978
TRINITY_DN24534_c3_g1_i3_gene=TRINITY_DN24534_c3_g1_len=3963	(TGGT)5	AGGGTTGGTTTGAGGAAGGT	59.834	GAAAGTCACTAGAAAACTAGAAAACCA	57.922
TRINITY_DN24534_c3_g1_i3_gene=TRINITY_DN24534_c3_g1_len=3963	(AAAT)5	TCGAGATGGAAATGAAACCC	59.871	ACCTTCCTCAAACCAACCCT	59.834
TRINITY_DN24534_c3_g1_i3_gene=TRINITY_DN24534_c3_g1_len=3963	(TG)10	TGCACAGTCAAAGCATGTCA	60.029	AATCACAAGTGTCGGTGCAG	59.751
TRINITY_DN24542_c1_g2_i1_gene=TRINITY_DN24542_c1_g2_len=319	(AG)6	GGGAGAGAGCGAGAGGAGTT	60.096	CGGGATTCTCCTTCTCATCA	60.15
TRINITY_DN24542_c3_g1_i13_gene=TRINITY_DN24542_c3_g1_len=1453	(A)10	ATTCCGAAGAAGCCATGAAA	59.645	ATCTTCCACTTCCACATGGC	59.934
TRINITY_DN24547_c3_g4_i1_gene=TRINITY_DN24547_c3_g4_len=1168	(A)11	TAGGTTGGATGCCAACAACA	59.964	TTGAGGGAGAGATTGATGGG	60.003
TRINITY_DN24558_c0_g1_i2_gene=TRINITY_DN24558_c0_g1_len=2698	(T)11	AAAAATGGAGGCCTTAGAGGA	59.21	AGCCTGCACAAATTGGAAGT	59.74
TRINITY_DN24563_c0_g1_i3_gene=TRINITY_DN24563_c0_g1_len=3810	(T)15	CCACCACCTTGTCTTGTCCT	60.002	TAGAGGATATGAATCGCGGG	60.016
TRINITY_DN24569_c5_g1_i2_gene=TRINITY_DN24569_c5_g1_len=1423	(TC)7	GGCTGGATTGAGCAGATCAT	60.189	TCAGCAGAAATAAACCGTGAA	58.426
TRINITY_DN24573_c0_g1_i7_gene=TRINITY_DN24573_c0_g1_len=3388	(TGT)5	CATTCCCGGAACAAAAATCA	60.671	CTTCCTCTTCCTCTTCGCCT	60.088
TRINITY_DN24575_c0_g1_i12_gene=TRINITY_DN24575_c0_g1_len=2156	(T)10	CCATTGATGTTGCAATTCCTT	59.815	AGTTGGTTTCTCCGCCTCTT	60.247
TRINITY_DN24577_c1_g2_i5_gene=TRINITY_DN24577_c1_g2_len=1367	(A)10	CCATTGTCAACCCCTCAAAC	60.21	GCGGGAGATCACAGATCAAT	60.042
TRINITY_DN24581_c0_g1_i3_gene=TRINITY_DN24581_c0_g1_len=1904	(T)10	CCCTTGAAACACAAACATGG	58.871	TGCCAATGAAAGCTATGGTG	59.688
TRINITY_DN24581_c0_g1_i3_gene=TRINITY_DN24581_c0_g1_len=1904	(T)11	GCTGGAGGTGGATCTTGGTA	60.073	AAGCTAATTAGGGCGGCAAT	60.082
TRINITY_DN24588_c0_g3_i1_gene=TRINITY_DN24588_c0_g3_len=2096	(CAC)6	TGAACGTTTCTCATCCTCTTCA	59.853	CAACAGTGCTAGCTCCACCA	60.049
TRINITY_DN24596_c0_g1_i8_gene=TRINITY_DN24596_c0_g1_len=1353	(GA)22	AAGAGAATCGGAAGGGGAAA	60.011	TACGTTTGGATGTGAAAGCG	59.729
TRINITY_DN24610_c0_g3_i1_gene=TRINITY_DN24610_c0_g3_len=1747	(GA)8	GATTCCGATGGTGCTGTTTT	59.939	CAAAGTCTCCCAAGCCAGAG	59.982
TRINITY_DN24611_c0_g1_i4_gene=TRINITY_DN24611_c0_g1_len=1444	(A)10	CCGCCTGAACAAATAAAAGAA	59.24	GGATTGAAGACCGATCCAAA	59.871
TRINITY_DN24611_c0_g1_i4_gene=TRINITY_DN24611_c0_g1_len=1444	(A)10	CCTGAACAACAAAAATTCGTGA	60.011	TCTCTTTGCCCTTCATCTCTTC	59.962
TRINITY_DN24613_c5_g1_i2_gene=TRINITY_DN24613_c5_g1_len=1249	(AAT)5	TCTTGTTCCTTGGCCTTGAC	60.232	TCCCATTTTACCCCTTTTCA	59.246
TRINITY_DN24615_c1_g1_i1_gene=TRINITY_DN24615_c1_g1_len=1843	(A)10	GTACCGCTAAGGCTCTTCCC	60.228	GATGGAGGTGGTTGCACTTT	59.973
TRINITY_DN24624_c0_g2_i1_gene=TRINITY_DN24624_c0_g2_len=432	(TG)7	AAAAACAATGTGCAAAGGGC	59.982	GGATAACTTGCCGAAATCCA	59.901
TRINITY_DN24625_c0_g1_i4_gene=TRINITY_DN24625_c0_g1_len=2771	(T)12	AACAGCTCAAGGTGGCATTT	59.74	AATGCACTTTACCCCTGCAA	60.502
TRINITY_DN24631_c0_g2_i4_gene=TRINITY_DN24631_c0_g2_len=3311	(TGT)6	TCCTCGTTCGAGTTCGAGAT	59.95	TCAGCCACAAAATCAGCAAC	59.847
TRINITY_DN24631_c0_g2_i4_gene=TRINITY_DN24631_c0_g2_len=3311	(TTG)5	TCCTCTACAACACCGAACCC	59.966	TGCAAAACAGTGGTTGTGGT	60.049
TRINITY_DN24631_c0_g2_i4_gene=TRINITY_DN24631_c0_g2_len=3311	(A)12	TCTCTTACCCTCTCCCCCAC	60.447	GCTTGGTTTCGTGATTTGTG	59.174
TRINITY_DN24632_c2_g3_i7_gene=TRINITY_DN24632_c2_g3_len=2459	(GAA)5	CGCGAAGAAGAACCTTATCG	59.975	ACGTTGCGATGAATTACGAA	59.186
TRINITY_DN24639_c0_g1_i3_gene=TRINITY_DN24639_c0_g1_len=1570	(AT)7	CGATCGGGTCAGTTGAGTTT	60.111	GGGAACAGCAAAAACAGCAT	60.118
TRINITY_DN24641_c1_g1_i1_gene=TRINITY_DN24641_c1_g1_len=1612	(AG)6	GGTGATGATTTTGTTTGGGC	60.177	AAAGGAAAAGTTGAAACAACAAAAA	59.538
TRINITY_DN24641_c1_g3_i1_gene=TRINITY_DN24641_c1_g3_len=494	(AG)9	GGGACTTTGCAGTTTCTGGA	60.232	GTTGACCTTGGGAAGGGAAT	60.169
TRINITY_DN24645_c1_g2_i5_gene=TRINITY_DN24645_c1_g2_len=2934	(T)11	CCAATCTTTGCTTCTATTTGGC	60.095	TGGAGGAATGAGATGGGAAG	60.003
TRINITY_DN24646_c3_g3_i1_gene=TRINITY_DN24646_c3_g3_len=412	(A)10	CGCCACTATTTGAAAACACC	58.147	TGGGTTTCCACGGTTTATTG	60.587
TRINITY_DN24650_c0_g2_i1_gene=TRINITY_DN24650_c0_g2_len=301	(TTCG)5	AGTTGTTCGACGGAATGGTC	59.973	GTTTCGTTTCCACTCCCCTT	60.34
TRINITY_DN24652_c0_g1_i2_gene=TRINITY_DN24652_c0_g1_len=2637	(TA)6	AAATGTAGGAGCAAAACAGTCCA	60.048	GGAGTAGGGGGAAAGAGCAT	59.536
TRINITY_DN24656_c2_g1_i1_gene=TRINITY_DN24656_c2_g1_len=1748	(A)10	AAACAACCCACAAAACCCAA	60.103	TTTGGGTTTGAGGAACAAGG	59.942
TRINITY_DN24656_c3_g2_i5_gene=TRINITY_DN24656_c3_g2_len=1317	(T)10	GCATTGTGTTCAACGTCCAG	60.16	CTGTTGATGCTGTGCCTTGT	59.905
TRINITY_DN24658_c0_g1_i1_gene=TRINITY_DN24658_c0_g1_len=438	(T)13	GGAAAAGAAGCTGTTGGTGG	59.711	GTTTCTTATCGGGCATTCCA	59.901
TRINITY_DN24660_c1_g1_i12_gene=TRINITY_DN24660_c1_g1_len=3281	(A)10	GTTGAAGATCAAAGGCCCAG	59.67	TTTGTATTCGCCACGTTCTTC	60.124
TRINITY_DN24662_c3_g3_i1_gene=TRINITY_DN24662_c3_g3_len=904	(A)17	ACACAACACAGACAGACGCC	59.789	TTTTCCCCTTCATTCGGATA	59.342
TRINITY_DN24670_c1_g1_i1_gene=TRINITY_DN24670_c1_g1_len=1985	(A)10	GCTGATCATTTTGCCTTGGT	60.081	TCTGTTCTTTCCCCTCTCCA	59.773
TRINITY_DN24671_c3_g1_i11_gene=TRINITY_DN24671_c3_g1_len=2245	(A)10	GGTCATTGCCCAAACTTTCA	60.874	TTGGATCTCAACCCGAAAAG	60.044
TRINITY_DN24671_c3_g3_i1_gene=TRINITY_DN24671_c3_g3_len=1220	(T)12	AGTAGAAGCCTCACCGGACA	59.867	TAAGCGCTTTTTGGTGCTTT	60.02
TRINITY_DN24672_c0_g1_i1_gene=TRINITY_DN24672_c0_g1_len=2176	(T)10	TCCAAGAAACTTCTCTCCCAA	58.895	CCGACGCACTTTTCCTAATG	60.628
TRINITY_DN24673_c0_g1_i4_gene=TRINITY_DN24673_c0_g1_len=2266	(T)10	CTTTCCCCACAATAGGTCCA	59.784	TCATTGGTTCCTTTCTTCTTCC	59.571
TRINITY_DN24675_c0_g1_i2_gene=TRINITY_DN24675_c0_g1_len=1516	(GA)6	TGCATAGACAGTTCCCATTGA	59.138	TGCCAGTGTCATTACCTCAGTC	60.179
TRINITY_DN24679_c0_g1_i2_gene=TRINITY_DN24679_c0_g1_len=1624	(AG)7	TGGATGAGGAAGCAAGTGAG	58.957	GCATGCTTTTGGGACATTTT	59.945
TRINITY_DN24679_c0_g2_i4_gene=TRINITY_DN24679_c0_g2_len=1948	(A)12	CCCTGCGGAAGTTACACAAT	59.993	GCAGCTGCAAACACACTGAT	60.064
TRINITY_DN24684_c0_g1_i2_gene=TRINITY_DN24684_c0_g1_len=2487	(CA)6	CCAGCTCATGTTGTTGTCGT	59.751	CCGAAAAACCCAACTGGATA	59.795
TRINITY_DN24684_c0_g1_i2_gene=TRINITY_DN24684_c0_g1_len=2487	(GTA)6	TGCATGCAAAGAAGAACCTG	59.988	AGTATTGCCGAGTGCTTTGC	60.416
TRINITY_DN24693_c1_g1_i1_gene=TRINITY_DN24693_c1_g1_len=418	(A)11	GGCCTGTGTTGATTTTGGTC	60.362	TCATTGCCACCATCATTTTC	59.33
TRINITY_DN24697_c1_g2_i2_gene=TRINITY_DN24697_c1_g2_len=618	(A)15	CCGAAATTAGTAGCGGTGGA	60.089	TCGCCTTGTTTTATTTGGTTG	59.986
TRINITY_DN24697_c1_g3_i4_gene=TRINITY_DN24697_c1_g3_len=407	(T)11	CGGTTGACCCACTGTCTTC	59.086	GGTGGTGTTAAAATCGTCGG	60.227
TRINITY_DN24699_c0_g3_i1_gene=TRINITY_DN24699_c0_g3_len=1186	(TC)7	CCTCCTCTCTATCTTTCAGCCC	60.694	GCAAATTTTAAGGGGGTGGT	60.055
TRINITY_DN24700_c8_g1_i2_gene=TRINITY_DN24700_c8_g1_len=3055	(GGT)7	GAAATGGATTGTGAGCGGAT	59.9	TCACAACAAAATCCAATGGC	59.375
TRINITY_DN24707_c0_g2_i3_gene=TRINITY_DN24707_c0_g2_len=2883	(T)10	TGATCTAAGGCGCCAGATTT	59.807	GCTCCAAACGTAGCAGTGTTC	59.935
TRINITY_DN24710_c0_g1_i1_gene=TRINITY_DN24710_c0_g1_len=1450	(GA)22	AGGGCGTGCTTTGAAGTAGA	60.015	TACAAAAAGACCCCAAAGCG	60.103
TRINITY_DN24714_c0_g2_i5_gene=TRINITY_DN24714_c0_g2_len=841	(TTG)5	GTAAGGGAATCCATGATCGG	59.2	GTGTCCCAGGAGGTCTCAAA	60.088
TRINITY_DN24714_c1_g1_i1_gene=TRINITY_DN24714_c1_g1_len=970	(AGA)5	GCAGCAACATTTGCATCAGT	59.878	TTTTTCCAACCACACAACCA	59.834
TRINITY_DN24714_c2_g1_i2_gene=TRINITY_DN24714_c2_g1_len=1254	(A)10	TAGCATTGCCTTGCCTTCTT	59.982	GGCCCATGATTGATCTTTTG	60.274
TRINITY_DN24714_c2_g2_i2_gene=TRINITY_DN24714_c2_g2_len=3923	(TCT)5	ATCCCTCAAAACACGAGCAG	60.255	TGCATATGATAATCGAGACCG	58.615
TRINITY_DN24716_c1_g1_i4_gene=TRINITY_DN24716_c1_g1_len=664	(T)12	GAGGAGCAGAAGAGGTGTGC	60.143	AAATCTCAACCCACCCACTG	59.82
TRINITY_DN24729_c0_g1_i1_gene=TRINITY_DN24729_c0_g1_len=3108	(CAT)5	ATGTTTGGGGGAACTAGGCT	59.827	CATCGCGATAGCATGAAGAA	59.937
TRINITY_DN24737_c0_g1_i10_gene=TRINITY_DN24737_c0_g1_len=2075	(A)12	CCAAAAGGGAATGATTTTCCA	60.996	ATCTGTGGCGGTGAAAAGTT	59.598
TRINITY_DN24741_c2_g1_i2_gene=TRINITY_DN24741_c2_g1_len=2207	(AG)7	GGAACCCAATTCTTGCTGAA	60.051	GTCCAGAGAAAAGCAAGCGT	59.621
TRINITY_DN24742_c0_g4_i2_gene=TRINITY_DN24742_c0_g4_len=308	(AC)8	ACCACACCCCACAAACACTT	60.174	ATGGTTATCCATGGGCTCTT	58.334
TRINITY_DN24748_c1_g1_i3_gene=TRINITY_DN24748_c1_g1_len=667	(A)15	CCAAACACTCCCTTAGCCAC	59.592	TTGAGACCGTTTTTGAAGGG	60.081
TRINITY_DN24750_c0_g2_i4_gene=TRINITY_DN24750_c0_g2_len=2647	(A)12	ACGTATTGTTCAGGCCCATC	59.82	TTGTTTCCTGTAATTTGGCCTT	59.878
TRINITY_DN24755_c0_g1_i3_gene=TRINITY_DN24755_c0_g1_len=2830	(CAG)6	CCTGATCAGAAAATTAGGGCA	59.168	ATACCGGAGAGGGGAGTGAT	59.778
TRINITY_DN24755_c0_g1_i3_gene=TRINITY_DN24755_c0_g1_len=2830	(GGT)5	CTGTTGTAGGAGGAGGGCTG	59.861	ATCCCTCCCAGAGGAATGTT	59.755
TRINITY_DN24756_c0_g1_i14_gene=TRINITY_DN24756_c0_g1_len=2546	(CCA)6	AACTCACCCCACTTCCACTG	60.002	AGGCCTCGTGTATATGGTGG	59.836
TRINITY_DN24763_c0_g1_i1_gene=TRINITY_DN24763_c0_g1_len=398	(TC)10	AAGGGGTTCACTGTGTGGAG	60.002	AGAGAGAAAGAGTGAATCGGGA	59.461
TRINITY_DN24766_c0_g2_i1_gene=TRINITY_DN24766_c0_g2_len=1725	(A)14	GGCAATGCCAAAGAAACAAT	59.945	CATCCGCAGAGCTACAACAA	60.011
TRINITY_DN24770_c1_g1_i9_gene=TRINITY_DN24770_c1_g1_len=1034	(GA)13	TCGTCGATCTCGGTTCCTAC	60.218	TCTCATCTTCCCAATGCTGA	59.322
TRINITY_DN24771_c0_g2_i1_gene=TRINITY_DN24771_c0_g2_len=2194	(A)11	AGCACATCCCAGCAGAAACT	59.874	TGCAGATCAAGGTCCCTTTT	59.67
TRINITY_DN24772_c0_g3_i1_gene=TRINITY_DN24772_c0_g3_len=1389	(A)11	AACACCATTATTTCAACTTCCCTC	59.67	TGAAGAGGGTTTGTAGTGACTTTG	59.727
TRINITY_DN24773_c0_g1_i16_gene=TRINITY_DN24773_c0_g1_len=5166	(AC)7	ATGTCGCCGGTATTTCTCAC	59.962	AGACTGCACTCTGCTGGGTT	60.057
TRINITY_DN24773_c0_g1_i16_gene=TRINITY_DN24773_c0_g1_len=5166	(A)11	GCAACCTCCACCACAAAACT	60.012	CGGTTTTCGGTATGATTTCG	60.315
TRINITY_DN24774_c4_g1_i1_gene=TRINITY_DN24774_c4_g1_len=1061	(T)14	TCATGTGAGGACACAAGATGAA	59.139	AAGGGCCGTTTACAACCTCT	59.998
TRINITY_DN24782_c1_g3_i2_gene=TRINITY_DN24782_c1_g3_len=1163	(T)10	TGCCAAAGAAGAGAGGGAGA	60.065	TCATTGTCCTATTTAAGTAGCTTTGG	59.231
TRINITY_DN24782_c1_g4_i3_gene=TRINITY_DN24782_c1_g4_len=1236	(A)12	TCCCCTCTTGTAAAACCTGTAA	57.803	TGCCAAAGAAGAGAGGGAGA	60.065
TRINITY_DN24784_c0_g1_i2_gene=TRINITY_DN24784_c0_g1_len=1393	(GA)10	CCTCCAAACGATGAATCTTGA	60.059	CTTTCCCCAGTTGAAAACGA	60.081
TRINITY_DN24786_c2_g1_i1_gene=TRINITY_DN24786_c2_g1_len=1787	(A)16	ATAGAACGTGGGTGGTCACG	60.833	TGTTTTGCAGCCATTGAAAG	59.849
TRINITY_DN24786_c2_g1_i1_gene=TRINITY_DN24786_c2_g1_len=1787	(A)11	TGACTTTTTGCAGTTTTTGTGG	60.179	GCCTCACAAGATTCCCTCTCT	59.832
TRINITY_DN24786_c3_g1_i8_gene=TRINITY_DN24786_c3_g1_len=1879	(A)13	GAAACAGATTCCCCTTCCTCA	60.428	GTTTTGTTGCCGTCGTTTTC	60.523
TRINITY_DN24786_c3_g1_i8_gene=TRINITY_DN24786_c3_g1_len=1879	(A)13	TCAAACCATGATTCCCCTTC	59.727	GCGATTTCAGTCGGTAGAGG	59.836
TRINITY_DN24786_c4_g1_i5_gene=TRINITY_DN24786_c4_g1_len=3047	(T)11	GAACCAACCAGCGAGATCAT	60.081	AGTGTGAGTTTGGGTGTTTGA	58.102
TRINITY_DN24790_c0_g2_i6_gene=TRINITY_DN24790_c0_g2_len=2649	(A)12	GAAGCCAAGCAAAAGAGTAGG	58.276	TTTGTTGAAATGCATCGCTC	59.816
TRINITY_DN24790_c0_g2_i6_gene=TRINITY_DN24790_c0_g2_len=2649	(A)11	TCTAGGAGCGATGCATTTCA	59.523	TCACAGCGGGATGACAATAA	60.073
TRINITY_DN24794_c0_g4_i3_gene=TRINITY_DN24794_c0_g4_len=1503	(T)12	GGTGACAGCACAGCAAGAAG	59.622	CTCGAGTCCCCCAAATATCA	59.887
TRINITY_DN24797_c0_g8_i1_gene=TRINITY_DN24797_c0_g8_len=1174	(A)10	GGTCCCATACATAAGTTATACAATCAA	58.687	CTTCGGGGACGATGAATAAA	59.894
TRINITY_DN24798_c2_g4_i2_gene=TRINITY_DN24798_c2_g4_len=619	(GAA)8	AGCGAAGGTCGTGAAACTGT	59.914	TTCAACATAACACCGCCAAA	59.969
TRINITY_DN24799_c0_g1_i1_gene=TRINITY_DN24799_c0_g1_len=551	(AAC)6	TCCCTCTTTCAACAACACCA	59.109	TGGGTGCAAGAGATTGTTTG	59.691
TRINITY_DN24799_c3_g2_i1_gene=TRINITY_DN24799_c3_g2_len=282	(A)10	TGGGATACAAATGAAACTCAATG	58.865	TCACATTGCGTGACAAACCT	60.16
TRINITY_DN24801_c1_g1_i3_gene=TRINITY_DN24801_c1_g1_len=821	(A)10	ATCTAACACCTGCGATGGCT	59.723	AACCAACATATAACACCCTTTTCA	58.779
TRINITY_DN24802_c2_g4_i2_gene=TRINITY_DN24802_c2_g4_len=1463	(A)10	CATGTCCCAATTGCAAAACA	60.357	TTTTTCCTTTTGGGTTGCTG	60.081
TRINITY_DN24803_c0_g1_i8_gene=TRINITY_DN24803_c0_g1_len=1740	(A)12	GAAGGAGGCAATTTAAGGGC	60.041	ACATTTCAACGGGATACGGA	60.192
TRINITY_DN24803_c0_g2_i7_gene=TRINITY_DN24803_c0_g2_len=1920	(A)10	CGTTTTCTGAAGTGGCTCCT	59.473	GGGTTCAGGTCCTTATTCTGC	59.954
TRINITY_DN24807_c0_g2_i4_gene=TRINITY_DN24807_c0_g2_len=1928	(TGA)11	CGCCCATTCTGCTACTCTTC	59.978	TTGGCCATACCTAAACAAAGAAA	59.892
TRINITY_DN24809_c1_g4_i2_gene=TRINITY_DN24809_c1_g4_len=1960	(A)10	CCGTGTTTCAATCCTCCAAT	59.79	GCTCCCATTTAATTTGTTGGTC	59.722
TRINITY_DN24809_c1_g4_i2_gene=TRINITY_DN24809_c1_g4_len=1960	(A)10	GGTTAACGGATCCCCAACTT	60.053	GCCCTTGTATTATGGGCCTC	60.662
TRINITY_DN24809_c1_g7_i1_gene=TRINITY_DN24809_c1_g7_len=1398	(CT)9	CCAGATGCAATCTCCTCCAT	60.034	TGTTGCCGAAGTTGTTGAAG	59.881
TRINITY_DN24814_c0_g1_i4_gene=TRINITY_DN24814_c0_g1_len=1946	(TA)8	CGAACCCACTGTCATTGTTG	60.001	CCAGTGGCTGGATAAGGAAG	59.688
TRINITY_DN24818_c1_g2_i1_gene=TRINITY_DN24818_c1_g2_len=817	(AAC)8	TGGGACGGATGGAGTATGAT	60.158	GCGGGAGTTGATCCATGTAG	60.483
TRINITY_DN24820_c1_g4_i2_gene=TRINITY_DN24820_c1_g4_len=364	(AGA)5	TGCAATCACAACACATTTTCC	59.435	GCAGCGGTTCTACGGATCTA	60.374
TRINITY_DN24826_c0_g1_i2_gene=TRINITY_DN24826_c0_g1_len=2063	(A)10	GGGATTGATTCAAACAAATTGC	60.536	CTGGAACTTCTTGTTTGGGC	59.711
TRINITY_DN24829_c0_g1_i3_gene=TRINITY_DN24829_c0_g1_len=2314	(GTT)5	GCTGTTCCGATTTCCAAGAG	59.813	AGCAGTGAAACCCCAACAAC	60.012
TRINITY_DN24829_c0_g1_i3_gene=TRINITY_DN24829_c0_g1_len=2314	(AG)13	TGGGTCTGAAGCTGTTTTGA	59.415	CGTTACCGTTTAACCCCTTTC	59.76
TRINITY_DN24829_c0_g2_i1_gene=TRINITY_DN24829_c0_g2_len=868	(GTT)5	GGTTGCGGATTGTTAGGTTG	60.365	TCTGGCTCATAGTTCGTCCC	60.218
TRINITY_DN24830_c1_g1_i1_gene=TRINITY_DN24830_c1_g1_len=1020	(TA)7	CCAAACCCTGTTGTTTGACA	59.435	AAAACCATAGCGTACGTGGC	60.025
TRINITY_DN24830_c1_g3_i1_gene=TRINITY_DN24830_c1_g3_len=943	(A)10	AACGTTGTGCTGCTGAAGAC	59.09	CCTCTCCTCCGTCAATTCAA	60.187
TRINITY_DN24830_c1_g4_i1_gene=TRINITY_DN24830_c1_g4_len=1599	(T)16	CTTGTCCTCGGAATTCTTGC	59.813	CAACAAACACCTCCTCCACA	59.565
TRINITY_DN24832_c0_g1_i1_gene=TRINITY_DN24832_c0_g1_len=3270	(AG)7	TCCAGAGGAATCCAATGGTAA	59.373	GGTCAAGCAAGCTCACACAA	60.032
TRINITY_DN24838_c4_g1_i3_gene=TRINITY_DN24838_c4_g1_len=1135	(A)10	TGCATCGCAAATGTGAAAGT	60.265	TGTTGGACGAACCAATCAGA	60.088
TRINITY_DN24841_c0_g1_i1_gene=TRINITY_DN24841_c0_g1_len=1058	(GTA)5	GGTGCTTCCATGATCTCACA	59.637	CCTCCTCCTTCTTCTCCTTTG	59.443
TRINITY_DN24844_c0_g1_i7_gene=TRINITY_DN24844_c0_g1_len=1943	(A)10	GGATGGAGAAGCAAATAACCA	59.033	TTGGCAAAGTTGTGTGTCGT	60.199
TRINITY_DN24852_c3_g2_i5_gene=TRINITY_DN24852_c3_g2_len=3068	(A)14	ACCAACACATGCTTCCATGA	59.967	TCCACAAGAACCCAATTAAGG	58.936
TRINITY_DN24854_c0_g1_i1_gene=TRINITY_DN24854_c0_g1_len=1287	(TGG)5	AGAGTAGATGGCTACGCCGA	60	ACCACCATACAACCACCACC	60.408
TRINITY_DN24862_c3_g1_i2_gene=TRINITY_DN24862_c3_g1_len=1887	(A)13	CATTGTGTCCAGAAAGGCAA	59.691	TCTGCTCAAGGAGAAACCGT	59.989
TRINITY_DN24862_c3_g1_i2_gene=TRINITY_DN24862_c3_g1_len=1887	(T)11	GTGAAGTTAATTTCGCCGGA	60.074	AAAAACGCTCTTGTACGAAAACT	58.627
TRINITY_DN24863_c0_g1_i1_gene=TRINITY_DN24863_c0_g1_len=1308	(A)10	CCATGAATCTGTGCATCTTGTT	60	GCTTGGAACCTTTGGACAAC	59.574
TRINITY_DN24865_c0_g1_i2_gene=TRINITY_DN24865_c0_g1_len=2560	(A)10	CGATGCTCAATCCTTCCAAT	60.036	TTCTCTTGTGTGAAGGTGCAA	59.475
TRINITY_DN24866_c0_g1_i5_gene=TRINITY_DN24866_c0_g1_len=1805	(GCG)5	ATGCGCCGTTTGAAACTTAC	60.138	TCATCATGTCCGATCACTCC	59.431
TRINITY_DN24866_c0_g1_i5_gene=TRINITY_DN24866_c0_g1_len=1805	(TCA)6	TCCCCTTCCCTTCATCTTCT	60.008	TTCCTCATGCTGTGTCTTGG	59.831
TRINITY_DN24871_c0_g1_i2_gene=TRINITY_DN24871_c0_g1_len=2260	(GGT)6	AGGGTGGAATTTAGGGGATG	60.011	GATCTATACGGCCGAGCAAC	59.696
TRINITY_DN24872_c2_g4_i1_gene=TRINITY_DN24872_c2_g4_len=5008	(A)10	CAACCTTCACTGCAAGCTCA	60.175	GGTCTCACACTTGTTTGGCA	59.726
TRINITY_DN24877_c1_g3_i1_gene=TRINITY_DN24877_c1_g3_len=592	(A)10	GGGTATCGCCATATAACCGA	59.643	CGGCGAGGTGAGTAATGTTT	60.132
TRINITY_DN24885_c0_g1_i6_gene=TRINITY_DN24885_c0_g1_len=2106	(A)14	TGCCCAACAACATAATCCTG	59.395	CTTGGGGTAAAATGGTTTGG	59.175
TRINITY_DN24885_c0_g3_i3_gene=TRINITY_DN24885_c0_g3_len=2246	(A)14	TGCAGCCTTAAAAGGACCAT	59.708	TGCAATAATGCAACTTCAAACA	59.26
TRINITY_DN24889_c1_g2_i4_gene=TRINITY_DN24889_c1_g2_len=1511	(A)15	GAAACCGGGATAACACGCTA	59.96	GGATACTGCAGGGCAAGAAA	60.214
TRINITY_DN24896_c0_g2_i15_gene=TRINITY_DN24896_c0_g2_len=2342	(A)15	CAACTTCCTCACCGTCGATT	60.111	ACCATGCTCAAACTTGCCTC	60.263
TRINITY_DN24896_c0_g2_i15_gene=TRINITY_DN24896_c0_g2_len=2342	(TC)7	CTGAACTGCCCAATACAGCA	59.864	AAGGACTTTCCTCTGTTAGAAGCA	59.954
TRINITY_DN24897_c1_g1_i4_gene=TRINITY_DN24897_c1_g1_len=2047	(A)11	CGTCATGACCATACTCACGG	59.984	GAAATGGGTTGGCCTATGAA	59.762
TRINITY_DN2490_c0_g1_i1_gene=TRINITY_DN2490_c0_g1_len=543	(AC)6	TCGTCTGACATGTGTTGTCG	59.265	TCAGGCAAAAGGAGGAGAAA	59.926
TRINITY_DN24914_c0_g1_i1_gene=TRINITY_DN24914_c0_g1_len=1359	(TCT)6	GGATTATAGGCAGCGTCCAA	60.06	CTCCAACAACTTCCCACGTT	60.005
TRINITY_DN24914_c1_g2_i2_gene=TRINITY_DN24914_c1_g2_len=903	(TCT)6	TCATCTCATCATTCTTTTCCCC	60.265	CGCCTTGACATGAACCTTTT	60.11
TRINITY_DN24918_c0_g6_i1_gene=TRINITY_DN24918_c0_g6_len=479	(TTG)6	ATCAACAGGTGGTGGACGAT	60.246	TGTTTGCGGTATTCAAGATCA	59.172
TRINITY_DN24924_c1_g2_i2_gene=TRINITY_DN24924_c1_g2_len=371	(CT)10	TCATGACAGTAACAACTGTAAAGAAGA	58.567	TGAAGTGAGAGAGTCGAGGGA	60.12
TRINITY_DN24924_c2_g1_i1_gene=TRINITY_DN24924_c2_g1_len=435	(A)18	ATTTGTTCCCCTCCCTGAAA	60.663	GTTTTGTCCCATGCTTCTGG	60.495
TRINITY_DN24924_c3_g2_i2_gene=TRINITY_DN24924_c3_g2_len=462	(AG)8	GCAGCAAGAACGACCATTTT	60.257	ATGCATGAGTTTGTTTTGCG	59.735
TRINITY_DN24943_c0_g1_i1_gene=TRINITY_DN24943_c0_g1_len=359	(A)11	CTAATGGGGGTGATGTGAGG	60.187	ATCCCTCTGCAATGTTAGCG	60.235
TRINITY_DN24947_c1_g1_i1_gene=TRINITY_DN24947_c1_g1_len=497	(TA)10	CTTGAGGGGGAGTGTTGAGA	60.229	TCATCGATGTATCAATCGGC	59.46
TRINITY_DN24948_c3_g1_i2_gene=TRINITY_DN24948_c3_g1_len=862	(TTC)8	TCTGGCAATGCCCTTAGACT	59.836	ATTGACGATTGAGGCTTGCT	59.843
TRINITY_DN24948_c5_g1_i1_gene=TRINITY_DN24948_c5_g1_len=884	(ATAC)5	CCCCCTAAATCAAATATCCCC	60.551	ATGACAAAGGGGGATAAGGC	60.152
TRINITY_DN24953_c0_g1_i1_gene=TRINITY_DN24953_c0_g1_len=2365	(GA)7	TGCCAAATGCTGGTAAGAGA	59.42	CATGCAAGAAGTTGAATTATGGA	59.133
TRINITY_DN24955_c0_g1_i6_gene=TRINITY_DN24955_c0_g1_len=1613	(CT)8	GAGGAGGTTGTGGAGATGGA	60.048	TGGTGCTCCCCCTACTTAATC	60.326
TRINITY_DN24958_c1_g4_i2_gene=TRINITY_DN24958_c1_g4_len=565	(AAAT)5	ACATTACATTTGTCAGCACAGC	57.839	TTCCCCATCTCACTTTCAGG	60.042
TRINITY_DN24958_c2_g3_i1_gene=TRINITY_DN24958_c2_g3_len=896	(T)10	AACAACACATCAGAGGCGTG	59.751	CCGGGACTCAGAAGATGAGA	60.34
TRINITY_DN24959_c3_g1_i1_gene=TRINITY_DN24959_c3_g1_len=909	(A)10	TGGTGCTAAGAGGAAGTGAACA	59.914	CTTGCTTTGCAATTTCATTCA	58.947
TRINITY_DN24962_c0_g3_i5_gene=TRINITY_DN24962_c0_g3_len=1644	(A)11	GGTTAAAAGGGAACAACACCAA	60.122	GGATTTGAATCTCAAGAAGCCA	60.562
TRINITY_DN24971_c0_g2_i1_gene=TRINITY_DN24971_c0_g2_len=521	(GA)11	GTTTTGGAGTCGGGTTTGAA	59.948	CTAACCGGTCTGGTCCACTC	59.574
TRINITY_DN24974_c0_g1_i5_gene=TRINITY_DN24974_c0_g1_len=1305	(A)11	CTTCATTTGCTGCACCTTCA	59.988	TTTGGTGCTTCAACTTCTGC	59.05
TRINITY_DN24976_c0_g3_i1_gene=TRINITY_DN24976_c0_g3_len=480	(TTG)8	TCGCATTTGATACCCAGACA	60.073	CAGTCTACACGAGTCAATACAAGC	58.163
TRINITY_DN24982_c2_g1_i3_gene=TRINITY_DN24982_c2_g1_len=1020	(TTG)5	AAGAAAACAAGACTCGCGCT	59.266	TTGAGTCAAAACAAAACATTGAA	57.415
TRINITY_DN24982_c3_g1_i8_gene=TRINITY_DN24982_c3_g1_len=2288	(A)16	CCAACCAACTTATCAACTCCAA	58.994	GGAACATCCTCTTCAAGCCA	60.195
TRINITY_DN24986_c0_g1_i7_gene=TRINITY_DN24986_c0_g1_len=2265	(A)10	GCAAAAAGGCTTGCAACTTC	60.003	GCTAGTGTCATGTTGGGGCT	60.142
TRINITY_DN24998_c1_g1_i2_gene=TRINITY_DN24998_c1_g1_len=1741	(T)10	TCGGATGCGAGACAATATCA	60.182	TTTCTCACAGTGGAGCCCTT	59.844
TRINITY_DN25000_c5_g1_i1_gene=TRINITY_DN25000_c5_g1_len=1283	(AT)11	GCCCAAAAATTCCTGGGATA	60.984	GGAAGGGAATGATGACGAAA	59.871
TRINITY_DN25000_c5_g2_i2_gene=TRINITY_DN25000_c5_g2_len=730	(T)10	TGACGAAAACTTTAGCCCCA	60.608	ATCTGGGAGATCAGAAGCGA	59.91
TRINITY_DN25005_c1_g1_i2_gene=TRINITY_DN25005_c1_g1_len=2869	(T)11	AGCTTTTACCACCCCCATCT	59.827	TCACCCTATCAACGTGGTTTC	59.845
TRINITY_DN25005_c1_g5_i1_gene=TRINITY_DN25005_c1_g5_len=773	(A)10	TGCCATATATGTGAAAGTGAAATC	58.091	TGCCCTCTCAAGTCACCTAA	58.442
TRINITY_DN25009_c0_g1_i4_gene=TRINITY_DN25009_c0_g1_len=3522	(A)14	GCCAAGCAAATAACCAAGTCA	60.124	AAAGACTGCCGCGAACTTTA	60.018
TRINITY_DN25011_c1_g1_i1_gene=TRINITY_DN25011_c1_g1_len=2540	(AAG)5	AAATCCAACATCTAGGTGCTACAAC	59.857	TCAAAGGTTTGGAGGAACTCA	59.697
TRINITY_DN25015_c1_g1_i4_gene=TRINITY_DN25015_c1_g1_len=1104	(ATC)5	ATCACCAGCATCCTCCAAAG	60.073	AGCTTAAACGTTTGCGTCGT	59.948
TRINITY_DN25015_c1_g1_i4_gene=TRINITY_DN25015_c1_g1_len=1104	(GGTTAG)5	GCCAATAACGAGACGTGGTT	60	ATCCTCAGCGTCAAATCACC	60.081
TRINITY_DN25015_c1_g1_i4_gene=TRINITY_DN25015_c1_g1_len=1104	(A)10	GGTGGGTATTAGCGGGAAAT	60.041	GCACCTACGTGCTCACACTC	59.498
TRINITY_DN25015_c2_g1_i17_gene=TRINITY_DN25015_c2_g1_len=2601	(TCC)7	AAGTGGGACTGGATGACCTG	59.962	TTTGTCCAATGAATCAATCAAA	57.991
TRINITY_DN25018_c0_g2_i5_gene=TRINITY_DN25018_c0_g2_len=2166	(A)10	TGCAACACAAAAGACCAAAAA	59.236	CCCCACTAAGGGGAGGTTTA	60.172
TRINITY_DN25020_c1_g1_i7_gene=TRINITY_DN25020_c1_g1_len=2672	(A)10	GCAATCACAGAACACAGCTCA	60.048	AAAAACCGCATGTCAGGAAC	59.978
TRINITY_DN25020_c1_g2_i1_gene=TRINITY_DN25020_c1_g2_len=1068	(T)16	GGAATGAGGGGGAAAACAGT	60.169	GTTGGGGAATCCCTTTCTGT	60.169
TRINITY_DN25028_c1_g1_i6_gene=TRINITY_DN25028_c1_g1_len=2530	(A)11	AAGAGAAACCAGCTACACCCA	58.851	GCACAATTTCACACCCACAC	59.862
TRINITY_DN25028_c1_g1_i6_gene=TRINITY_DN25028_c1_g1_len=2530	(TTC)5	GTGTGGGTGTGAAATTGTGC	59.862	TTTTCAAGAGAGAGAAAGAGAAAGAGA	59.856
TRINITY_DN25028_c1_g3_i1_gene=TRINITY_DN25028_c1_g3_len=1466	(GA)6	GAGCGAAGACGTTGAGAAGG	60.134	TCACAACTCACTCACTCACTTCAA	59.992
TRINITY_DN25029_c1_g1_i9_gene=TRINITY_DN25029_c1_g1_len=2414	(A)10	CCACATGAAGAACAAAGCCA	59.691	GGAGTGAGATGCATGACCAA	59.637
TRINITY_DN25031_c1_g1_i2_gene=TRINITY_DN25031_c1_g1_len=762	(T)15	ACGTGGTGGTGACATTGAGA	60.005	AGGGAGGAAGGAGAGACAGG	59.801
TRINITY_DN25031_c1_g1_i2_gene=TRINITY_DN25031_c1_g1_len=762	(CT)9	TCAAACGGTCACCCTCTCTT	59.697	TCCCCAAAATTCCAAAACAA	60.138
TRINITY_DN25036_c2_g1_i1_gene=TRINITY_DN25036_c2_g1_len=393	(A)13	TCTCTTTCTCATCTTTGTCCCC	59.691	CTCTCACGGTCGGGTACCTA	60.126
TRINITY_DN25036_c2_g2_i4_gene=TRINITY_DN25036_c2_g2_len=972	(T)13	CAAAGCCTCTTCATCCGAAC	59.813	TTTGTCCCCTTTCTTCTAAACA	57.915
TRINITY_DN25046_c0_g1_i4_gene=TRINITY_DN25046_c0_g1_len=2026	(A)10	AGAACAAGTAGGCGCTTCCC	60.763	AGAAATTGGTGGAGGAGCTG	59.284
TRINITY_DN25049_c0_g1_i3_gene=TRINITY_DN25049_c0_g1_len=1468	(A)11	GTTGGGCACAGAGGCTAAAA	60.249	GGCGACTGGCTATTGGTTTA	60.096
TRINITY_DN25054_c0_g1_i5_gene=TRINITY_DN25054_c0_g1_len=2220	(A)11	AATTCCCGACACAGTGGAAG	59.966	GTTCGGTCTGTTCTGCAGGT	60.307
TRINITY_DN25055_c1_g1_i6_gene=TRINITY_DN25055_c1_g1_len=2481	(T)10	CAGCCATATCCAACAAAACAA	58.544	CTGGGTCTTCCTTGTTCTTCA	59.314
TRINITY_DN25055_c1_g1_i6_gene=TRINITY_DN25055_c1_g1_len=2481	(GA)10	TGGGTTGATAGGGAGGTTGA	60.309	CAGTTTTGTGCAAATTCCGA	59.706
TRINITY_DN25060_c0_g4_i5_gene=TRINITY_DN25060_c0_g4_len=1113	(A)11	CCAAATCAAACCTGGAAAACA	59.825	AATCAGCCACCTGCAAAATC	60.081
TRINITY_DN25064_c1_g1_i6_gene=TRINITY_DN25064_c1_g1_len=3023	(A)12	GAACACAGATCCTCCACACAAA	60.012	CGATTTTGTTTCCACAACCC	60.206
TRINITY_DN25064_c1_g1_i6_gene=TRINITY_DN25064_c1_g1_len=3023	(A)10	GAACTTCCACCACCCTTTGA	59.943	TTTGTGTGGAGGATCTGTGTTC	60.012
TRINITY_DN25065_c0_g1_i1_gene=TRINITY_DN25065_c0_g1_len=622	(A)14	GGAGCAGAATACGCGAAATG	60.742	TGTTTTGGTTCATTTTCCCC	59.64
TRINITY_DN25065_c1_g1_i1_gene=TRINITY_DN25065_c1_g1_len=1623	(A)12	AGTATTTTGCCGACCACCAC	59.859	GCCCCAAAACAAACAAGAAA	59.953
TRINITY_DN25065_c3_g5_i6_gene=TRINITY_DN25065_c3_g5_len=2258	(A)10	TAGCCCAAGAAAACCCTGAA	59.679	GAAAGAGCACACAAATGGCA	59.847
TRINITY_DN25075_c0_g1_i12_gene=TRINITY_DN25075_c0_g1_len=2047	(GA)6	CGACGCCAAATCCATTAGTT	59.96	AAACCCTCAAAACCCTCCC	60.154
TRINITY_DN25081_c0_g3_i1_gene=TRINITY_DN25081_c0_g3_len=1087	(A)11	TCAGTTTCATCCAAACAGCAA	59.307	GCGTGTCGATTTCGAGATTT	60.221
TRINITY_DN25086_c2_g1_i8_gene=TRINITY_DN25086_c2_g1_len=1694	(A)11	CAAAGACAGTGCCAATTCCA	59.691	CTTCGTGGTGGAAGAGTGGT	60.151
TRINITY_DN25094_c1_g1_i1_gene=TRINITY_DN25094_c1_g1_len=3332	(AG)6	GGTGATGCGAATTTTGGTTT	59.807	CGAGTCGAGTCACCACTGTC	59.442
TRINITY_DN25094_c1_g1_i1_gene=TRINITY_DN25094_c1_g1_len=3332	(ATG)6	TGCATATCCCGAATCTCCTC	59.998	CGGCGACAAATTTTCCTCTA	60.202
TRINITY_DN25094_c2_g1_i1_gene=TRINITY_DN25094_c2_g1_len=2891	(A)14	AAATCCCTTAAATCCAAAGCAA	59.028	TTGGGAGAAATCACATGCAG	59.648
TRINITY_DN25103_c0_g1_i2_gene=TRINITY_DN25103_c0_g1_len=986	(A)13	AAAGAAAAACCCAAATCCGC	60.292	TTTCGATACTCCACCCGTTC	59.933
TRINITY_DN25103_c1_g1_i1_gene=TRINITY_DN25103_c1_g1_len=1643	(A)18	AAAATTGTTTGTTGCCAGCC	59.982	TTGATTGGCCTTATTCCAGC	60.038
TRINITY_DN25105_c0_g1_i1_gene=TRINITY_DN25105_c0_g1_len=1634	(A)10	AAATCTGTTGACCCCCTTCC	60.169	AAAAGTGTGCTTTCTGATGCAA	59.926
TRINITY_DN25110_c0_g1_i2_gene=TRINITY_DN25110_c0_g1_len=3903	(ATT)6	CAGGAGGTGCACTATCAGCA	60.008	TCGAGTCATCATCGGCATAG	59.781
TRINITY_DN25111_c0_g1_i1_gene=TRINITY_DN25111_c0_g1_len=1178	(A)11	TCTGCGTTGTCATAACCAAAAG	60.166	ATGGGGTAAACTGTGGCATC	59.676
TRINITY_DN25118_c1_g1_i1_gene=TRINITY_DN25118_c1_g1_len=635	(TC)10	CTCCGCCATTTTTCAGTTTC	59.685	TGGTGGAAGGAGGTATCAAGA	59.536
TRINITY_DN25118_c1_g2_i1_gene=TRINITY_DN25118_c1_g2_len=243	(TC)8	GGGATTCACACTCACGATCA	59.478	GAAGATGGTGAATGGAGGGA	59.862
TRINITY_DN25119_c0_g1_i1_gene=TRINITY_DN25119_c0_g1_len=306	(TC)7	TCCCTCTTTCTCTCCTTCACC	59.803	ACTTTGGCTTTGATTGGGAA	59.546
TRINITY_DN25126_c2_g5_i1_gene=TRINITY_DN25126_c2_g5_len=315	(A)11	CCCTACACTGAAAACCCCAA	59.824	TTCGGATGGTTGAGATGAGA	59.166
TRINITY_DN25127_c0_g1_i2_gene=TRINITY_DN25127_c0_g1_len=1423	(A)13	GAACCATGCTTCTACCCGAA	60.074	AGCTTTCTTGTTGCCCTTTG	59.494
TRINITY_DN25127_c0_g2_i5_gene=TRINITY_DN25127_c0_g2_len=2783	(T)10	CCCATGGATGAAAGGAGAGA	60.003	TCAAACGCATCCTCACAAAC	59.697
TRINITY_DN25127_c0_g3_i1_gene=TRINITY_DN25127_c0_g3_len=2798	(GA)9	CCGCATTGAAGTTTTTAGCC	59.72	CATTCACCCCACGTTTCTCT	59.966
TRINITY_DN25132_c0_g1_i2_gene=TRINITY_DN25132_c0_g1_len=1851	(T)10	GCATACCCTTTCTTTGATTGGA	60.312	GCAGAAGGTGTGGTGGAGAT	60.12
TRINITY_DN25134_c0_g1_i1_gene=TRINITY_DN25134_c0_g1_len=6865	(T)15	GATGAGGGTTTGGAGTTGGA	59.903	ATTCACCGGCATTAAAACCA	60.188
TRINITY_DN25149_c1_g4_i2_gene=TRINITY_DN25149_c1_g4_len=842	(AAG)5	GGAGTTGGTGGAACTTTGGA	59.943	AACACCTTGTTTGGCTCCAC	60.012
TRINITY_DN25155_c1_g1_i3_gene=TRINITY_DN25155_c1_g1_len=1011	(GAA)6	AGAAGAAGACGTCGTCGGAA	59.989	AAGCTAAACGGTGCGTTCAT	59.775
TRINITY_DN25158_c0_g1_i3_gene=TRINITY_DN25158_c0_g1_len=2736	(CT)8	TGCTCTGAGAGGTTGTTGGA	59.545	TTCCCTTCACCATGTTCCTC	59.903
TRINITY_DN25158_c0_g1_i3_gene=TRINITY_DN25158_c0_g1_len=2736	(TAT)5	TGGTTGAAGAGAAGGTTGAGC	59.463	TTCCAACAACCTCTCAGAGCA	60.959
TRINITY_DN25163_c0_g1_i3_gene=TRINITY_DN25163_c0_g1_len=1990	(T)12	GCCTTGATCAACCGACCATA	60.864	TGCCTTCCTACTCGTTCGAC	60.397
TRINITY_DN25168_c0_g8_i1_gene=TRINITY_DN25168_c0_g8_len=347	(AGA)5	CGTATTGAATCTCGTTGGAACA	59.996	GGTTTGGACATTGTTTGCCT	59.836
TRINITY_DN25174_c0_g2_i7_gene=TRINITY_DN25174_c0_g2_len=2149	(AG)10	TGCGTAGACGTACACTGGTTG	59.837	TCCTTCTTTTCAATCGCTCG	60.46
TRINITY_DN25178_c0_g1_i1_gene=TRINITY_DN25178_c0_g1_len=1296	(T)10	TCGCAGCTCCTCTCTCTCTT	59.579	GAGTGAGGTTGTTGGCGAAT	60.119
TRINITY_DN25178_c0_g5_i1_gene=TRINITY_DN25178_c0_g5_len=328	(AG)8	AATCTGGAAAGCGTTCATGG	60.074	GCCATAACAGAATGCTCCCT	59.154
TRINITY_DN25183_c0_g1_i2_gene=TRINITY_DN25183_c0_g1_len=3858	(A)10	CAATAGGATCCCCAGAAGCA	60.029	TCACGTTGTTATTACCGAATTTGT	59.72
TRINITY_DN25183_c0_g1_i2_gene=TRINITY_DN25183_c0_g1_len=3858	(A)12	TGCAGTGTATTGTATAACCTCAAATG	59.432	GCAAAGCCATGTGTCTGCTA	60.019
TRINITY_DN25186_c0_g6_i1_gene=TRINITY_DN25186_c0_g6_len=1025	(A)10	CCCTGTCCCAAATAACTGGA	59.784	GGAATGGTGCTGTTGTTCCT	59.973
TRINITY_DN25187_c0_g2_i2_gene=TRINITY_DN25187_c0_g2_len=1475	(T)11	GTGGTGAAGAGGATAGGCCA	60.073	TACGCAACCCAATGAAACAA	59.969
TRINITY_DN25188_c0_g1_i3_gene=TRINITY_DN25188_c0_g1_len=1734	(TTC)7	ATAGAAGCGCGTTGTCGTTT	59.911	AATCGAACGCTTTGAGCCTA	59.982
TRINITY_DN25190_c0_g2_i5_gene=TRINITY_DN25190_c0_g2_len=1875	(TTC)5	GACGGAACGGAAGGTTGTAA	59.971	CTCCACCATGCTTTCTCTCC	59.803
TRINITY_DN25192_c3_g2_i8_gene=TRINITY_DN25192_c3_g2_len=880	(A)10	TGAACCACAAGCGAGAAGTG	60.025	TTTTGAGCTCGATTTAATTTTCG	59.765
TRINITY_DN25194_c0_g4_i1_gene=TRINITY_DN25194_c0_g4_len=743	(A)10	CCTCCACGTCGTCACAACTA	59.745	TGATTGACGTCGTCCTTTGA	60.24
TRINITY_DN25195_c3_g2_i1_gene=TRINITY_DN25195_c3_g2_len=1071	(A)10	CAAAAACAGACCCAACGAAA	58.648	CCATCATGTACTGTCCCCCT	59.655
TRINITY_DN25203_c0_g1_i6_gene=TRINITY_DN25203_c0_g1_len=2977	(A)18	GATAAGCGCCTTGCAGTTTC	59.988	AACTGGGAGGATCTATGGGC	60.293
TRINITY_DN25212_c0_g1_i1_gene=TRINITY_DN25212_c0_g1_len=2006	(AT)6	GCCACTGGCTGCAAATAAAT	60.103	GGCTATCTTGGAAAAAGGGG	59.903
TRINITY_DN25214_c0_g3_i6_gene=TRINITY_DN25214_c0_g3_len=2193	(A)10	CTGATGAGCAAAGCACCATC	59.399	TTAATGTCCTTCGTGTTGCG	59.729
TRINITY_DN25215_c0_g1_i1_gene=TRINITY_DN25215_c0_g1_len=374	(CT)7	CCTCAATCTACGGAGCACTCA	60.403	CGCCATCAATTACTTCCGTT	59.96
TRINITY_DN25215_c1_g1_i3_gene=TRINITY_DN25215_c1_g1_len=3472	(A)11	ATTTTTGGCATGCCTTATGC	59.935	CTGGGGTGAACGAAGCTTTA	60.241
TRINITY_DN25215_c1_g1_i3_gene=TRINITY_DN25215_c1_g1_len=3472	(A)11	TGGCTGAACAAAAATTACAAAAA	58.751	CAAGGCAGACTGTGATGGTC	59.261
TRINITY_DN25215_c2_g1_i4_gene=TRINITY_DN25215_c2_g1_len=2810	(A)10	AGTTTGGCCGAAAACAAATG	59.975	CCCTGCTGTGGTGCTTCTA	59.992
TRINITY_DN25216_c0_g1_i16_gene=TRINITY_DN25216_c0_g1_len=2537	(AAC)5	TGAAAGCAATTGCGTACGAG	60.014	TCACCATCTTCCGCAATACA	60.073
TRINITY_DN25217_c2_g1_i2_gene=TRINITY_DN25217_c2_g1_len=3006	(A)10	GAACGTTGTTTGGTGGGAAC	60.255	CATCCATTCTCCATCGTTCA	59.451
TRINITY_DN25218_c1_g1_i17_gene=TRINITY_DN25218_c1_g1_len=1518	(A)13	GCAAATGTTCCACCTGCTCT	60.263	TTCTATTGCGGCGTTAGAGG	60.356
TRINITY_DN25222_c0_g7_i2_gene=TRINITY_DN25222_c0_g7_len=369	(CT)7	TCACCACTTGAAGAATCACCA	59.124	AGTGGTGAGTGATGATGAAGAAG	58.322
TRINITY_DN25224_c2_g3_i1_gene=TRINITY_DN25224_c2_g3_len=1446	(TG)6	TGGATGTTCAAGCATAGGCA	60.22	GCCTCTTATCACTCCACGACA	60.27
TRINITY_DN25225_c0_g1_i7_gene=TRINITY_DN25225_c0_g1_len=2508	(A)12	GATTCTCACCACCACGGTTT	59.827	CCCAAAACCAACGAAGAAAA	59.947
TRINITY_DN25230_c0_g4_i2_gene=TRINITY_DN25230_c0_g4_len=778	(T)10	CCAATCAGCCATTCGAAGAT	60.036	AGATACATCTGAGCCGTCGAA	59.851
TRINITY_DN25240_c1_g1_i3_gene=TRINITY_DN25240_c1_g1_len=5016	(AAC)5	GCCTAAGTGCAAATCCTCAAA	59.352	TGACGCAAGTTGATCCATGT	60.12
TRINITY_DN25243_c0_g3_i1_gene=TRINITY_DN25243_c0_g3_len=764	(AGT)5	GTCCCAAAAGTCCCTTCCAT	60.169	TCCAACAAGCCATGAAACAA	60.088
TRINITY_DN25243_c1_g5_i1_gene=TRINITY_DN25243_c1_g5_len=1112	(TGA)9	AGAGAGACGGAAGGGAGGAG	59.945	CATGAACATGCAGGAAGGTG	60.112
TRINITY_DN25247_c0_g3_i3_gene=TRINITY_DN25247_c0_g3_len=2015	(T)10	CCACCACCTCTCTCACCAAT	59.962	TGGATTTGTTTTATATTTATGCATGTG	60.244
TRINITY_DN25249_c2_g3_i1_gene=TRINITY_DN25249_c2_g3_len=1790	(A)16	ACCATCAACATCCCCATGAT	59.869	GTGTGTTGCTATTGCCCCTT	60
TRINITY_DN25251_c0_g1_i4_gene=TRINITY_DN25251_c0_g1_len=2474	(TAAA)5	GGAATGGATGAACAAAGGTTTT	59.223	TTGCGATTTCAGCTTCATTG	59.953
TRINITY_DN25257_c0_g1_i9_gene=TRINITY_DN25257_c0_g1_len=7393	(CA)6	AAAAATCATGCATAGCGCAC	58.799	TCACTTCCCAGCTTGTACCC	60.111
TRINITY_DN25262_c0_g1_i9_gene=TRINITY_DN25262_c0_g1_len=1650	(T)11	TGCATATCAAACCACATTCAA	57.493	CAATGAAGACAACTCCACCAAA	60.008
TRINITY_DN25262_c0_g1_i9_gene=TRINITY_DN25262_c0_g1_len=1650	(T)10	TGCATATCAAACCACATTCAA	57.493	CAATGAAGACAACTCCACCAA	58.609
TRINITY_DN25266_c0_g1_i1_gene=TRINITY_DN25266_c0_g1_len=722	(AG)9	CTCTGCTAGAAATCCACCGC	59.978	TGAAATTCACTTCCACCCAA	58.947
TRINITY_DN25269_c0_g3_i6_gene=TRINITY_DN25269_c0_g3_len=3769	(A)10	CCAAAAGAAACCAAATCAACAA	59.007	AAAGTGGGTTTGTGTGTGGC	60.854
TRINITY_DN25269_c0_g3_i6_gene=TRINITY_DN25269_c0_g3_len=3769	(TTC)5	TGGTTGCTGTTGCTATTGCT	59.493	TTGAGGACAGTGCAAGTTCG	60.025
TRINITY_DN25272_c6_g3_i1_gene=TRINITY_DN25272_c6_g3_len=2296	(A)13	GCTGCAGTAGGGATTGTTAGC	59.013	TAGCTTGTAGGCACGCAAAA	59.648
TRINITY_DN25273_c0_g1_i1_gene=TRINITY_DN25273_c0_g1_len=897	(CT)6	CCCTTTTTCCTCGAAACCTC	60.046	GTCGGCAGTGAACGGTAATC	60.526
TRINITY_DN25278_c1_g8_i1_gene=TRINITY_DN25278_c1_g8_len=228	(A)12	TAATCAGCCCAAAACCATCC	59.762	TGAGGGTCTATTTTAGGGGGA	59.779
TRINITY_DN25282_c0_g1_i1_gene=TRINITY_DN25282_c0_g1_len=945	(AAC)5	CGATTCCCTTTGACCAAAAA	59.91	TGTCAGCGGTCATCTTGTTC	59.837
TRINITY_DN25282_c0_g1_i1_gene=TRINITY_DN25282_c0_g1_len=945	(AGG)7	TGAGACGGTGGATTTTCGTT	60.495	TCTCCCACAATTCCAACACTC	59.958
TRINITY_DN25282_c0_g4_i1_gene=TRINITY_DN25282_c0_g4_len=630	(AG)14	AGTGAGGAGAAAATTGGGGG	60.298	GCGTTCCTATCCACTCTTTCC	60.089
TRINITY_DN25286_c0_g1_i1_gene=TRINITY_DN25286_c0_g1_len=2833	(A)10	AGGCACAGACAAAAGCAACA	59.49	TGGACATCCCAGAAATTGTGT	60.225
TRINITY_DN25296_c0_g3_i1_gene=TRINITY_DN25296_c0_g3_len=717	(A)10	TAGCAATTTGCCCCCTTTGT	61.691	TTTGTTTTCCTCGTTGTCCC	59.948
TRINITY_DN25298_c1_g1_i1_gene=TRINITY_DN25298_c1_g1_len=215	(A)10	TGCATAAATTGTGTATCACCCC	59.592	CAATTTGGTGGAATGCATGA	60.321
TRINITY_DN25299_c0_g2_i2_gene=TRINITY_DN25299_c0_g2_len=520	(A)10	ATTGGTTGGTCTCCGGTATG	59.67	TCCATCAGATCCACGATGAA	60.006
TRINITY_DN25299_c0_g3_i1_gene=TRINITY_DN25299_c0_g3_len=750	(A)10	CCGCTGAGTCATCCGTTATT	60.096	TCAGTTCCACACGCAGATGT	60.319
TRINITY_DN25301_c0_g1_i3_gene=TRINITY_DN25301_c0_g1_len=2704	(A)10	TGAGGACCACGACAATTCAA	60.088	TGCTGTTTGATGCACTTCTG	58.571
TRINITY_DN25305_c1_g1_i1_gene=TRINITY_DN25305_c1_g1_len=1959	(T)14	AACCAAAAGCCATCACATCC	59.797	TTGCAGCCTTTTTCTTTGTG	59.083
TRINITY_DN25313_c0_g1_i1_gene=TRINITY_DN25313_c0_g1_len=1809	(AGA)5	GCATCGGAAATTTGCTTCAT	60.045	CAAGGCTCCAACTGATAGGC	59.836
TRINITY_DN25314_c2_g1_i3_gene=TRINITY_DN25314_c2_g1_len=1350	(CCA)5	CTTCCTCCCCCTATACCACC	59.646	TGGTTTAGGCCAAGGTTTTG	59.968
TRINITY_DN25314_c3_g1_i12_gene=TRINITY_DN25314_c3_g1_len=2339	(CCA)5	CACCAGCAAGAAACCCATTT	59.971	GGATGGAGGGGGTTACTCAT	60.015
TRINITY_DN25317_c0_g1_i6_gene=TRINITY_DN25317_c0_g1_len=2652	(T)15	GTTCGCCGCTGCTATCTATC	59.973	GATACCAAGAAACCCCACCA	59.647
TRINITY_DN25319_c2_g1_i2_gene=TRINITY_DN25319_c2_g1_len=922	(G)14	AAAAAGGGGTTCACCTGAGA	58.618	TGTTGTTGCTTGGTTGCATT	60.157
TRINITY_DN25326_c0_g2_i4_gene=TRINITY_DN25326_c0_g2_len=1196	(T)10	TGCTCGCATAAATTAACCCA	59.169	TGATTGGATGAGTTTGTTGTAGGT	59.804
TRINITY_DN25329_c2_g1_i5_gene=TRINITY_DN25329_c2_g1_len=1875	(AT)11	CATCAACCCCGCAGAAGTAT	59.955	GGTTAATGGGAGACAAGCGT	59.056
TRINITY_DN25334_c0_g1_i1_gene=TRINITY_DN25334_c0_g1_len=3685	(A)10	CATGTATGAGGGAAGAGGGG	59.356	TGAATGTGAAGCGCTACTGG	60.011
TRINITY_DN25337_c2_g1_i8_gene=TRINITY_DN25337_c2_g1_len=2712	(A)13	GCCACCACAAAGTTAACCAG	58.132	GGGTGCTGCAAAGGTTAAAA	60.11
TRINITY_DN25352_c0_g2_i1_gene=TRINITY_DN25352_c0_g2_len=354	(A)10	TGACGATAAAGTTGTTGTCCCA	60.399	TTTCGCAAACATCATCCAGA	60.197
TRINITY_DN25366_c2_g2_i2_gene=TRINITY_DN25366_c2_g2_len=2459	(ATC)10	CACTCTGGACACCACCAGAA	59.705	TGAAGTGTTGAGCTGGGATG	59.831
TRINITY_DN25370_c0_g1_i1_gene=TRINITY_DN25370_c0_g1_len=2063	(A)10	TGAATTTTGCATTCAACCAA	57.606	TGCATTGGTGTTTACCTGGA	59.964
TRINITY_DN25374_c0_g1_i1_gene=TRINITY_DN25374_c0_g1_len=2988	(TA)6	GGGTATGAAGACATTAAGCGAGA	59.643	GTGTTTGCTTGGCCTTGTTT	60.154
TRINITY_DN25374_c0_g2_i1_gene=TRINITY_DN25374_c0_g2_len=727	(A)15	CACCCACAAACCAAATCTTCA	60.771	TCGCTGAATGAGTTCACACC	59.837
TRINITY_DN25376_c2_g2_i2_gene=TRINITY_DN25376_c2_g2_len=1212	(A)16	TGCCTGTTTAGGGCATTTGT	60.502	GCCCTCTTGCACAATTTAGG	59.708
TRINITY_DN25380_c2_g1_i2_gene=TRINITY_DN25380_c2_g1_len=3267	(GTT)6	CAAGTGCCAACTCAGCAGAA	60.175	TGGGGTGCTACACAAATCAA	59.964
TRINITY_DN25380_c2_g1_i2_gene=TRINITY_DN25380_c2_g1_len=3267	(TTG)5	GTGTTGTTGTTGGTTCGACG	60.049	TGTTCAATGGTGTTGGAGGA	59.935
TRINITY_DN25380_c2_g1_i2_gene=TRINITY_DN25380_c2_g1_len=3267	(TTA)16	TGGTTGTGACGAAATTTTGAA	59.048	CGTCGAACCAACAACAACAC	60.049
TRINITY_DN25381_c0_g2_i4_gene=TRINITY_DN25381_c0_g2_len=2136	(T)10	CATTCCCATTTGCTTTAGCC	59.547	TATGGCCGGTTGTTTTATGG	60.56
TRINITY_DN25381_c0_g2_i4_gene=TRINITY_DN25381_c0_g2_len=2136	(T)12	GCAACAAGGTCTCATCATGC	59.25	GTTGTTTTGCGGAGGAGATG	60.636
TRINITY_DN25381_c0_g2_i4_gene=TRINITY_DN25381_c0_g2_len=2136	(T)12	GGAACTCCTCCATCTCCTCC	60.012	GATGAGACCTTGTTGCTTGGA	60.248
TRINITY_DN25383_c4_g2_i1_gene=TRINITY_DN25383_c4_g2_len=428	(A)10	TAGTCTCAACCGCAGCACAT	59.47	TTTTGCTATTTTCAGTTCATCATCA	60.019
TRINITY_DN25386_c0_g1_i2_gene=TRINITY_DN25386_c0_g1_len=2048	(A)10	CGCAAAAAGGTGGTAATTGG	60.348	GAAGACAAAGCAAACCCTCC	58.766
TRINITY_DN25387_c0_g1_i4_gene=TRINITY_DN25387_c0_g1_len=2168	(A)10	CGGATACGAAATCGAGAGGA	60.17	TCGCTTCCAATCAAATCTCC	60.155
TRINITY_DN25387_c0_g1_i4_gene=TRINITY_DN25387_c0_g1_len=2168	(A)10	GGACTGCCATACCTGATGCT	60.104	TCATTCACCGTGGTCAGATT	58.933
TRINITY_DN25389_c0_g2_i3_gene=TRINITY_DN25389_c0_g2_len=2397	(ATC)5	CCTTTCCTCCTGAACCAACA	60.081	CATTCAGACAGTGATTGCGG	60.263
TRINITY_DN25397_c2_g2_i1_gene=TRINITY_DN25397_c2_g2_len=1364	(AAG)5	ATCCGTCCCCTTCGTATCTT	59.789	GACGGAGGTTGCAAGATGAT	60.081
TRINITY_DN25401_c1_g1_i15_gene=TRINITY_DN25401_c1_g1_len=1666	(A)11	GAACCTGGATCCAATTGCTG	60.461	TGAATCGCACTGACCTCAAC	59.837
TRINITY_DN25403_c6_g2_i3_gene=TRINITY_DN25403_c6_g2_len=3661	(GA)6	TGGTTTTGTTGCAGAGAGGA	59.415	GACATGATCCCCACTCCCTA	59.737
TRINITY_DN25406_c0_g1_i3_gene=TRINITY_DN25406_c0_g1_len=3330	(GA)21	AACGAGGAAAGTGAGGAGAGG	59.864	CTCATTTCATCACCCAACCC	60.173
TRINITY_DN25406_c0_g2_i6_gene=TRINITY_DN25406_c0_g2_len=2029	(T)10	TGCAATTTCCCTCAACATGA	60.049	TTGTGTGGAAAATGTTTGGG	59.268
TRINITY_DN25410_c3_g4_i1_gene=TRINITY_DN25410_c3_g4_len=316	(AAACA)5	TCGAAGCATCTTTCGGTAGC	60.49	CATTTTGGAGGGTTTGGTTG	60.198
TRINITY_DN25412_c0_g1_i1_gene=TRINITY_DN25412_c0_g1_len=1280	(CT)6	TCGTTCCCATGGTTTCTCTC	60.05	CCAGATGACAAAGATTAGTGCG	59.769
TRINITY_DN25412_c3_g2_i1_gene=TRINITY_DN25412_c3_g2_len=490	(A)10	CCAACCATGCTTGAACCAAT	60.755	TGGGTGTCTTTTCAGTTCTTCC	60.508
TRINITY_DN25415_c0_g2_i1_gene=TRINITY_DN25415_c0_g2_len=3465	(AGG)5	GAGGGTGCACCAAGAACAAT	59.973	ATCAGGAAGAGCGGAACTGA	59.95
TRINITY_DN25415_c0_g2_i1_gene=TRINITY_DN25415_c0_g2_len=3465	(A)10	GCAGCCGTAAGTGAAGGGTA	60.27	GTTGCTCCACCACCAAAGAT	59.973
TRINITY_DN25418_c0_g2_i2_gene=TRINITY_DN25418_c0_g2_len=2405	(A)12	CATGGACTTTGTGGTTCCAA	59.389	GCTAACTGTCAAAGGATAAGTGAGG	59.751
TRINITY_DN25420_c1_g1_i2_gene=TRINITY_DN25420_c1_g1_len=1790	(A)11	TCTCTTGCATGTTATTGAGACACA	59.813	GCTGATATTGGGCTCTGCAT	60.207
TRINITY_DN25420_c1_g3_i2_gene=TRINITY_DN25420_c1_g3_len=2058	(A)10	CGTTAGCACGGCATGTAAGA	59.895	GATGTCTGAGAATGCCACGA	59.794
TRINITY_DN25420_c1_g3_i2_gene=TRINITY_DN25420_c1_g3_len=2058	(ATA)5	GATTTGGTAGGTTTTGGGCA	59.801	CCACAGTTCTTGAGTTCTGGC	59.899
TRINITY_DN25420_c1_g3_i2_gene=TRINITY_DN25420_c1_g3_len=2058	(A)10	GATTTGGTAGGTTTTGGGCA	59.801	CCACAGTTCTTGAGTTCTGGC	59.899
TRINITY_DN25422_c2_g1_i2_gene=TRINITY_DN25422_c2_g1_len=1186	(CT)6	GCCAACTCATACGACCGATT	59.962	TCTTGGTGATTCCTCTGCAA	59.369
TRINITY_DN25428_c3_g2_i1_gene=TRINITY_DN25428_c3_g2_len=2280	(T)12	AAAGAAAGAAGGCTCCACCC	59.691	GTACGGTACGGAGACGGAAG	59.615
TRINITY_DN25428_c3_g2_i1_gene=TRINITY_DN25428_c3_g2_len=2280	(A)10	GCAAGAGTCAACACAACCCA	59.726	TACAGCCATGGCAGAATCAA	60.22
TRINITY_DN25432_c1_g1_i1_gene=TRINITY_DN25432_c1_g1_len=1106	(CTCTCA)13	ATCCCCCATAACCGTTTCTC	60.017	TTCTGAGTTTGTGCTTTGGC	59.05
TRINITY_DN25432_c2_g1_i1_gene=TRINITY_DN25432_c2_g1_len=2017	(TGT)5	GAAGGGAGAATGCGTTTGAG	59.813	ACGACACGATCAACCATGAA	59.967
TRINITY_DN25435_c0_g1_i1_gene=TRINITY_DN25435_c0_g1_len=231	(GTT)6	TCTTTGGACGACAACCTCGT	60.69	GGGTAATTGACCATGCTTTTG	59.329
TRINITY_DN25438_c0_g6_i1_gene=TRINITY_DN25438_c0_g6_len=1151	(A)10	CCAACTCAACCGATCAAACA	59.541	ATCACTTTCATCGATTCCGA	58.088
TRINITY_DN25448_c2_g1_i2_gene=TRINITY_DN25448_c2_g1_len=1574	(A)10	CATGCACGCATCTTATTGAG	57.889	TGTCTGAGCACCGAAGAAGT	58.594
TRINITY_DN25450_c0_g2_i2_gene=TRINITY_DN25450_c0_g2_len=1401	(CAC)5	CATTGTGAAACTCGCCCTTT	60.11	CCACTTCGAAGACGACGATT	60.255
TRINITY_DN25455_c2_g1_i2_gene=TRINITY_DN25455_c2_g1_len=1850	(T)11	GAATCATTGGGAATTGGGAA	59.558	ACAAGCTATGCCCAACCAAG	60.132
TRINITY_DN25459_c4_g3_i3_gene=TRINITY_DN25459_c4_g3_len=2286	(T)10	GTTGTGCTTGTGATGTTGGG	60.008	AAGAAGGCATGGCTTGAAGA	59.955
TRINITY_DN25459_c4_g6_i1_gene=TRINITY_DN25459_c4_g6_len=940	(T)10	CACGGTCATCACTCAACCTG	60.154	ACTCAAGAACGCCAACAACA	59.339
TRINITY_DN25461_c0_g1_i7_gene=TRINITY_DN25461_c0_g1_len=2956	(A)10	CAACACATCACGGGTCTTTG	60.001	TGGAAGTTTGGAGAACCACC	59.943
TRINITY_DN25461_c0_g1_i7_gene=TRINITY_DN25461_c0_g1_len=2956	(AG)9	GTCCAAAGGGGCTGTATGTG	60.375	CTTTCTCTCACTTGCCCGTC	59.989
TRINITY_DN25461_c0_g2_i1_gene=TRINITY_DN25461_c0_g2_len=547	(AG)10	ACGCGACCAATGAGAGAGAT	59.834	TTCGTTCCCATGTTTCACAA	59.941
TRINITY_DN25466_c1_g1_i1_gene=TRINITY_DN25466_c1_g1_len=889	(A)10	CAACAGCAACAGTGCCAAAT	59.764	CCCTTGCCTGTAACTTCCAT	59.052
TRINITY_DN25472_c0_g2_i1_gene=TRINITY_DN25472_c0_g2_len=486	(A)10	AAAAATGAACTGCAATACGGG	59	TGCTCACCCTGATGATGAAT	59.04
TRINITY_DN25474_c1_g2_i2_gene=TRINITY_DN25474_c1_g2_len=326	(A)13	CGTTCCACCTATAACCGATCA	59.831	GTTTTTCTTCAACCGGAGCA	60.227
TRINITY_DN25476_c1_g3_i1_gene=TRINITY_DN25476_c1_g3_len=284	(A)19	GGTACCAAATTCAAACCAAAGTG	59.675	TCCAGTGAGACATCGACAGG	59.82
TRINITY_DN25485_c0_g2_i6_gene=TRINITY_DN25485_c0_g2_len=1457	(A)10	TCCACCAAACTAAATTCGCC	59.938	GGAGATGTGAATGAGGCTGG	60.622
TRINITY_DN25488_c0_g1_i2_gene=TRINITY_DN25488_c0_g1_len=965	(AT)7	GGGCCATGGTGACTTTATTG	60.192	TGATCTTTCTTCGAACTTTTTATCA	58.563
TRINITY_DN25493_c0_g1_i1_gene=TRINITY_DN25493_c0_g1_len=3169	(GT)6	CCAGAACAAGACCTGACAAGC	59.899	CAAACAACCAGATGGTCCAA	59.389
TRINITY_DN25493_c0_g1_i1_gene=TRINITY_DN25493_c0_g1_len=3169	(A)10	GGATCTAACACCAAACCAATCA	58.812	TCATATGATCTTTGCTCCGTCT	58.814
TRINITY_DN25496_c1_g1_i1_gene=TRINITY_DN25496_c1_g1_len=1506	(TG)6	GATGGAATGGTTTTGATGCC	60.141	TCAGTCCATGTTGCGTTGTT	60.16
TRINITY_DN25497_c1_g5_i1_gene=TRINITY_DN25497_c1_g5_len=750	(A)11	CGGCAGACAGAAGAACACATT	60.306	CCTGCCACGTGTCCTTTAAT	59.993
TRINITY_DN25509_c0_g2_i1_gene=TRINITY_DN25509_c0_g2_len=420	(A)10	GCGATATACTTTGAACGCGA	58.939	GTTGGAACATTGTGGAAGCA	59.547
TRINITY_DN25510_c0_g2_i5_gene=TRINITY_DN25510_c0_g2_len=2744	(T)11	CACAAAAGCAGCAGCAGAAG	59.928	TCATCATGACTTTGAGTCACTAAGC	59.839
TRINITY_DN25510_c0_g4_i1_gene=TRINITY_DN25510_c0_g4_len=240	(A)10	CATATTCACGCGATTCATGC	60.066	CCGATGTCTGTGCTTCATTG	60.263
TRINITY_DN25518_c0_g1_i9_gene=TRINITY_DN25518_c0_g1_len=1979	(A)10	CACACTTCCGTATGAGGCAA	59.716	ATGCGTTGGTTTCATGGTTT	60.235
TRINITY_DN2552_c0_g1_i1_gene=TRINITY_DN2552_c0_g1_len=478	(GA)8	TCCTTTCTGGCAATGTTGTG	59.691	CAGCATAGTCTGCAGGGTCA	60.008
TRINITY_DN25521_c1_g1_i1_gene=TRINITY_DN25521_c1_g1_len=3302	(TTG)6	AGTTGTTGCTGCGTGGAAGT	60.896	CAGACACACACCTTCATCGG	60.154
TRINITY_DN25526_c0_g1_i3_gene=TRINITY_DN25526_c0_g1_len=1306	(T)10	CAAAATTTGCCAAACACCCT	59.839	GCTGATTGAGAAATGGGAGAA	59.259
TRINITY_DN25535_c1_g1_i1_gene=TRINITY_DN25535_c1_g1_len=810	(A)11	TCCAACTGAGCTACCCCATC	60.073	GTTTTCGGCTAAATGGAAGC	58.833
TRINITY_DN25538_c0_g3_i1_gene=TRINITY_DN25538_c0_g3_len=1849	(ACC)6	AAGACACACTCCCCTCCCTT	59.968	TGATCGGAGGAAGGTTTTTG	60.044
TRINITY_DN25539_c0_g3_i4_gene=TRINITY_DN25539_c0_g3_len=3199	(T)15	CATCGTTTCACCGATCTTCA	59.648	TGGTTTCCTTTCTTTTTCTTTCTC	59.34
TRINITY_DN25545_c1_g1_i1_gene=TRINITY_DN25545_c1_g1_len=1288	(A)10	GCCAAAAAGAGGGAATTCAA	59.135	CGCCGTCGATTCTCTATCTC	59.939
TRINITY_DN25547_c0_g1_i1_gene=TRINITY_DN25547_c0_g1_len=2950	(TGA)6	GCGAGTTTGGGTTTTGAGAG	59.853	TTTGTTTAGCACACAACAGCG	59.964
TRINITY_DN25557_c0_g1_i4_gene=TRINITY_DN25557_c0_g1_len=2148	(AT)7	GATGTTCCAGTGGTTGCCTT	59.973	CAGCACCATTCACAACCCTA	59.566
TRINITY_DN25558_c0_g1_i3_gene=TRINITY_DN25558_c0_g1_len=2289	(T)10	GCCGCAACAAAACACTTTTA	58.866	TTCTGCAAGATTGCAAGGTG	59.988
TRINITY_DN25560_c1_g10_i1_gene=TRINITY_DN25560_c1_g10_len=750	(T)14	ATGAACTTGGTAAGGGTGCG	59.993	CGGTAGGCCTTGAAGTAGGTT	59.661
TRINITY_DN25561_c1_g4_i4_gene=TRINITY_DN25561_c1_g4_len=2358	(A)14	GGACCCTGATACGCCATTTT	61.072	CCCTGTCACCACACATCAAC	59.846
TRINITY_DN25561_c1_g6_i1_gene=TRINITY_DN25561_c1_g6_len=612	(TCA)6	GAGTCGGCAACATGAATCAA	59.654	TTACCTGTGTCGGCGTGTTA	60.172
TRINITY_DN25565_c0_g1_i2_gene=TRINITY_DN25565_c0_g1_len=2147	(CTTT)7	AGTAGCCATGGAAATGGTCG	59.955	TGAACGGTGACAGTGTCTGAG	59.924
TRINITY_DN25568_c1_g1_i3_gene=TRINITY_DN25568_c1_g1_len=1146	(CT)6	GGGGGTTACGATTCATTCAT	58.573	TGCTTAAAGTCGTGGTGCAG	60.05
TRINITY_DN25569_c0_g4_i6_gene=TRINITY_DN25569_c0_g4_len=1416	(A)10	CACAAATGCCACAAAACCTG	60.004	CCTCTCCCTCTTTTCTCCGT	59.811
TRINITY_DN25569_c0_g5_i2_gene=TRINITY_DN25569_c0_g5_len=2872	(GCT)5	AGTATGCAGGAATTGCAGGG	60.096	GCAACAGCAACAACAGCAAT	59.918
TRINITY_DN25572_c0_g1_i1_gene=TRINITY_DN25572_c0_g1_len=215	(AGA)5	CGGTAACGTTCTTCCTCGAC	59.734	AAAAGCGGAAAAAGAGAGGC	59.966
TRINITY_DN25578_c0_g1_i1_gene=TRINITY_DN25578_c0_g1_len=664	(T)16	GGGAAAGACGAAGTGAGACG	59.844	CGGCAAATATACCAATACAAATAACA	60.249
TRINITY_DN25578_c2_g1_i4_gene=TRINITY_DN25578_c2_g1_len=1408	(T)14	GCAGTGGCAAGAAGGGAGTA	60.397	TCCCAAGAGAACATGAAGCC	60.195
TRINITY_DN25579_c1_g1_i1_gene=TRINITY_DN25579_c1_g1_len=954	(ATGA)5	GTGGAGAAGGCAACCTTTGA	60.232	GGTTGGTTATTCATGCACCTTT	60.116
TRINITY_DN25579_c2_g3_i1_gene=TRINITY_DN25579_c2_g3_len=852	(CAT)6	CAAAAAGCTCCAGAAACCCA	60.22	GATTGCTTGCAGGGTATGGT	59.962
TRINITY_DN25579_c2_g6_i1_gene=TRINITY_DN25579_c2_g6_len=405	(TGT)6	CGCAGTTGCTGATGAGGTAA	60.011	CTCCCCTTTTCGTTAGACCC	59.934
TRINITY_DN25579_c2_g7_i1_gene=TRINITY_DN25579_c2_g7_len=1326	(TGT)6	CGTTGACCTCTTTCAATGGC	60.636	TGCTTGATCCACGAAGATACC	60.088
TRINITY_DN25579_c2_g7_i1_gene=TRINITY_DN25579_c2_g7_len=1326	(ATG)8	TCCCTTCTCTTTTGTTTGCC	59.288	TGGTCAAGAACATGCCAGAA	60.24
TRINITY_DN25589_c0_g2_i3_gene=TRINITY_DN25589_c0_g2_len=676	(A)14	ACTCAAATGGGAATCAACCG	59.79	TTGTTGCCCTTTTGTTCCTC	60.088
TRINITY_DN25589_c0_g2_i3_gene=TRINITY_DN25589_c0_g2_len=676	(TCA)8	GCCAAAAAGGACCTATAATCTTCA	59.88	TAGAAAGGCGATGGAGGAGA	59.91
TRINITY_DN25590_c0_g1_i8_gene=TRINITY_DN25590_c0_g1_len=1431	(A)10	GCGTTTCGCTTCTTTCGTAT	59.501	TTGAAGGACTATTGAAGCCCA	59.693
TRINITY_DN25592_c0_g1_i3_gene=TRINITY_DN25592_c0_g1_len=1846	(TCA)7	GGCAACCGAAGTCATGCTAT	60.103	CTGCCAACGACATTGTGACT	59.751
TRINITY_DN25595_c3_g1_i1_gene=TRINITY_DN25595_c3_g1_len=331	(AAAT)5	ACTGATTCCACTCCTGCCAT	59.535	CGCATACTCAAAATGAAGGG	58.241
TRINITY_DN25595_c4_g1_i15_gene=TRINITY_DN25595_c4_g1_len=3783	(T)10	AGTGTTGGAGTGAAGGGTGG	60.002	CATACGTGGCAGCTTAGGGT	60.154
TRINITY_DN25595_c4_g1_i15_gene=TRINITY_DN25595_c4_g1_len=3783	(AAAT)5	TCCAAAAAGCATCAAAAGCC	60.188	AAACAAATGATGCTCCTGCC	60.081
TRINITY_DN25603_c0_g1_i17_gene=TRINITY_DN25603_c0_g1_len=4113	(T)12	AAACAATTTCATGTTATTGCTATGGA	60.036	CCAATGAACCAAGCCAGAGT	60.111
TRINITY_DN25603_c0_g1_i17_gene=TRINITY_DN25603_c0_g1_len=4113	(A)12	TCATTTCCTAATTTTAACACATGCT	58.289	CAGGATCGTTCACTTCATGC	59.245
TRINITY_DN25606_c0_g1_i2_gene=TRINITY_DN25606_c0_g1_len=1595	(TAG)5	TGGTGAGGCAATGATGAAAA	60.049	TCCCCACGCATTTCTATTCT	59.528
TRINITY_DN25606_c0_g2_i2_gene=TRINITY_DN25606_c0_g2_len=2137	(ATT)5	TCACCACCACCACCTTGATA	59.806	AGATTTCACCTGGGAACACG	59.966
TRINITY_DN25610_c0_g1_i2_gene=TRINITY_DN25610_c0_g1_len=1756	(A)15	GGTTTTTCAGGGGGTTGATT	60.032	TTATCACGTTCCCATCACCA	59.774
TRINITY_DN25614_c1_g1_i1_gene=TRINITY_DN25614_c1_g1_len=3067	(AG)6	CTCCTTCAACCTGCTGCTTC	60.134	GCAATTTTCAGAGCATTTTTCC	60.082
TRINITY_DN25614_c1_g1_i1_gene=TRINITY_DN25614_c1_g1_len=3067	(AGT)6	GTTGGGAGGATCAAGACGAA	60.05	GAGTGAAAAAGCGGGATCTG	59.813
TRINITY_DN25617_c0_g1_i2_gene=TRINITY_DN25617_c0_g1_len=1185	(GAG)5	ACATCACTTGAAGTCCCCCA	60.363	GGATTGCACGGTAGACCATT	59.82
TRINITY_DN25620_c0_g1_i1_gene=TRINITY_DN25620_c0_g1_len=374	(GA)9	GCTAGGGAAAATTGAAGGGG	59.903	GAGTGTGCAATTGTGGTTGG	60.008
TRINITY_DN25620_c1_g1_i7_gene=TRINITY_DN25620_c1_g1_len=3522	(A)10	AAATTCCATCCAATTTTCCAG	57.91	CCAATGATGTTGAATTTGGG	58.669
TRINITY_DN25620_c1_g1_i7_gene=TRINITY_DN25620_c1_g1_len=3522	(TC)7	TCGGATCCAACCCAATCTAA	60.266	AAATTAAACAAACCAAAGTCATTCAA	59.326
TRINITY_DN25622_c1_g1_i2_gene=TRINITY_DN25622_c1_g1_len=1218	(AG)8	AACTCCATGATTCTCGTGCC	60.081	CGACCATTCCTCTTCTTTCTCT	58.988
TRINITY_DN25622_c1_g2_i1_gene=TRINITY_DN25622_c1_g2_len=1603	(GA)6	TACTCGGTGGTTGTTGGTGA	60.001	GATGTGTTCCTAACCGAACTCAG	60.047
TRINITY_DN25626_c0_g2_i2_gene=TRINITY_DN25626_c0_g2_len=1029	(A)11	CAAAAGCTGTATTTTCCGGC	59.72	CGCATAAGCGCTTCTCAAA	60.244
TRINITY_DN25630_c2_g3_i1_gene=TRINITY_DN25630_c2_g3_len=912	(A)10	CAAGGGATGAGAACAAGATCC	58.582	AATTCATTGCACAAGACGCA	60.265
TRINITY_DN25632_c0_g2_i1_gene=TRINITY_DN25632_c0_g2_len=1829	(A)10	ACCAAACCAGACACCAAACC	59.721	TGTTCTTTCTTTGTTTGGGATG	59.108
TRINITY_DN25635_c1_g1_i1_gene=TRINITY_DN25635_c1_g1_len=1188	(T)10	CCAATCTATCATTGCCGGAT	59.745	CGCAATTCAATTCAGCGATA	59.803
TRINITY_DN25635_c3_g8_i1_gene=TRINITY_DN25635_c3_g8_len=5339	(T)11c	ACGATTCGAGACCCCTTTTT	59.94	TCTGAAACCGTGGCACAATA	60.111
TRINITY_DN25635_c3_g8_i1_gene=TRINITY_DN25635_c3_g8_len=5339	(A)10	CAAACTTGATACTGATTTTTCCGA	59.556	GCTTTTCACCCTTCATTCCA	60.051
TRINITY_DN25635_c3_g8_i1_gene=TRINITY_DN25635_c3_g8_len=5339	(T)11	CATAGGCTTGTGACAAAGAAGA	57.187	TTTTCAAATTTTAATGGGAAGGA	58.926
TRINITY_DN25635_c3_g8_i1_gene=TRINITY_DN25635_c3_g8_len=5339	(A)10	GAAAACGTTGTCCAGACATCATAA	60.276	CCGTTCGATTAATCCGTAAAT	58.03
TRINITY_DN25638_c3_g1_i1_gene=TRINITY_DN25638_c3_g1_len=3193	(TGT)6	AACGGAAACCGTAGATGCTG	60.132	GACGACAAGACGAATGAGCA	59.992
TRINITY_DN25638_c4_g4_i2_gene=TRINITY_DN25638_c4_g4_len=1009	(ATTA)5	AACAATTATCGGTAACGAACAAAA	58.939	ATTGGCTACACGGCTCAATC	60.103
TRINITY_DN25638_c4_g4_i2_gene=TRINITY_DN25638_c4_g4_len=1009	(AAG)5	TCATCACCACCACCAACATC	60.23	CCTGCTCCTGTTGGAAGAAG	59.982
TRINITY_DN25639_c0_g2_i7_gene=TRINITY_DN25639_c0_g2_len=1679	(GA)8	CCCCTTTGCTCATGTTGATT	59.933	ATGCTTTCTTGGTTCACGCT	59.882
TRINITY_DN25646_c1_g2_i1_gene=TRINITY_DN25646_c1_g2_len=728	(TA)6	ACTGCATAGCATGGGTCCTT	59.579	GTCGTCAGGCTGTCACAACA	60.951
TRINITY_DN25647_c0_g3_i1_gene=TRINITY_DN25647_c0_g3_len=993	(A)11	CAATTTCACCAACCCCAAAC	60.066	TTGGTTCATGCTGCTTTCAG	59.988
TRINITY_DN25647_c1_g1_i1_gene=TRINITY_DN25647_c1_g1_len=218	(A)18	TGATCTTCTGCTGCTCATCAA	59.688	TCAATTTTCGTTTGCATTCTTC	59.234
TRINITY_DN25651_c1_g1_i7_gene=TRINITY_DN25651_c1_g1_len=3843	(A)14	TCAGTCACCAAGGTACCCAA	58.98	TCGATTTCATTTCATTTCGATG	59.907
TRINITY_DN25654_c0_g1_i2_gene=TRINITY_DN25654_c0_g1_len=2265	(A)12	AAAAGTTTCTTCGGAACAGGAA	59.282	ATGGTGTCCACTCCACCTTT	59.279
TRINITY_DN25654_c0_g1_i2_gene=TRINITY_DN25654_c0_g1_len=2265	(A)11	CCGTTTCAATGCTTGGTTCT	60.11	TTTTCTATAGGCGTCAGTTCCA	58.899
TRINITY_DN25656_c0_g1_i1_gene=TRINITY_DN25656_c0_g1_len=1799	(AGA)5	ATCGAAAGGCCACAAGAAGA	59.813	AAATTCGCCATCTTCCTTCA	59.645
TRINITY_DN25656_c0_g2_i1_gene=TRINITY_DN25656_c0_g2_len=973	(AGA)6	AGGTGTGTCGTTTTTGGAGC	60.156	CGCAGAAAGAAAGATGGAGG	59.948
TRINITY_DN25660_c2_g1_i11_gene=TRINITY_DN25660_c2_g1_len=4921	(T)10	CACCAGGGAAATCGGTAGAA	59.926	GCGGTACTGGAGGATGAAAA	60.074
TRINITY_DN25660_c2_g1_i11_gene=TRINITY_DN25660_c2_g1_len=4921	(A)10	CGTGCAGTGTCACATGATTG	59.732	TGATGGGATGATTGAAGATAGG	58.857
TRINITY_DN25660_c2_g6_i1_gene=TRINITY_DN25660_c2_g6_len=370	(T)14	GGAGAGTCCCAACCGATGTA	59.927	CCGATGTAAAAAGTGATTCTTTGA	59.556
TRINITY_DN25660_c2_g6_i1_gene=TRINITY_DN25660_c2_g6_len=370	(T)13	TGGAAACTCCCACCGATTTA	60.301	GGGACTCTCCACCGATGTAA	59.927
TRINITY_DN25661_c0_g1_i13_gene=TRINITY_DN25661_c0_g1_len=3531	(T)11	GCGGTGAGAGAGGAATCTTG	59.95	CGGACCCGAAATCTGAAAT	59.879
TRINITY_DN25667_c1_g6_i1_gene=TRINITY_DN25667_c1_g6_len=263	(A)10	TCAACCTAAGCTTCCTATTGCC	59.758	AGCATGAAGCTTGGAAGGAG	59.574
TRINITY_DN25677_c0_g1_i2_gene=TRINITY_DN25677_c0_g1_len=1037	(T)11	AAGCACTTTCTTCCCTCGCT	60.517	TTTTCGAAATTAGAGTGAATAAAATTG	58.451
TRINITY_DN25677_c1_g5_i5_gene=TRINITY_DN25677_c1_g5_len=2457	(T)12	CAATTGGGGGAAATTGAAGA	59.733	CAAGCATAGAAATCGCAACG	59.467
TRINITY_DN25678_c0_g1_i1_gene=TRINITY_DN25678_c0_g1_len=2381	(GA)9	CCCATGTTGCAAGTGACTGA	60.722	TCTAACTTCACAGCCCCACC	60.111
TRINITY_DN25679_c0_g1_i8_gene=TRINITY_DN25679_c0_g1_len=3128	(A)11	GTCTTGGGCAAAAGATTCCA	60.051	GTGGCGCACAATTTTCTTCT	60.257
TRINITY_DN25686_c0_g1_i3_gene=TRINITY_DN25686_c0_g1_len=1109	(AGA)6	AGGCTTGTACCTTGAGCGAA	60.015	TCAACTTTTCTTCTTCCGCC	59.429
TRINITY_DN25686_c1_g3_i5_gene=TRINITY_DN25686_c1_g3_len=881	(AAG)5	TGCTATGAGTCCACACCCAA	60.112	TTCTCGTCGACTCCTCCAGT	59.986
TRINITY_DN25687_c0_g1_i4_gene=TRINITY_DN25687_c0_g1_len=1597	(A)10	TCCTGCAAAGAAACAAAGCC	60.365	TGTTCCAATCTATGGGCACTT	59.443
TRINITY_DN25687_c0_g2_i6_gene=TRINITY_DN25687_c0_g2_len=4029	(A)16	AGGCATCCAAAGTATCCACG	59.955	TTGCCCTTGACGAAGTATTTG	60.117
TRINITY_DN25688_c0_g1_i3_gene=TRINITY_DN25688_c0_g1_len=1913	(CAA)5	CATTTCTGAAAAGCCCCAAA	60.046	TAGGCAGTCCACAACCAACA	60.152
TRINITY_DN25694_c3_g1_i3_gene=TRINITY_DN25694_c3_g1_len=2101	(TGA)5	AGGTTGCAAGACAGAAACAACA	59.819	ACCCAAAGCTCTTCCGTTTT	60.11
TRINITY_DN25694_c3_g1_i3_gene=TRINITY_DN25694_c3_g1_len=2101	(A)13	GCCTAGGAATACTATCAATCACGC	60.358	GCGGAGTAATGGCCCTAGAT	60.439
TRINITY_DN25702_c0_g1_i1_gene=TRINITY_DN25702_c0_g1_len=2502	(T)10	GCGAAGACGGAGCACATAAT	60.243	TTCATCCCACAAACCTCTCC	59.903
TRINITY_DN25704_c0_g2_i1_gene=TRINITY_DN25704_c0_g2_len=1294	(AGA)5	GAACATCAGTGCGCTGAAAA	59.995	GTGGCGCCATCTGTAGACTC	60.833
TRINITY_DN25710_c3_g1_i1_gene=TRINITY_DN25710_c3_g1_len=218	(AC)6	TCTTCGACTGGACAACCTCC	60.238	GGTTGTGCATCAGTTGCTTG	60.31
TRINITY_DN25712_c0_g1_i1_gene=TRINITY_DN25712_c0_g1_len=1196	(CTT)5	TGGTCATCTTCTTCAGCGTG	59.984	AAGAAGAAAAAGAAGCCCGC	59.966
TRINITY_DN25712_c0_g2_i2_gene=TRINITY_DN25712_c0_g2_len=1307	(A)10	CTGCTTCTCCACTCTCCTCG	60.275	TGGATAAGTTGGCCCAGAAG	60.066
TRINITY_DN25713_c1_g1_i5_gene=TRINITY_DN25713_c1_g1_len=1846	(CTA)6	CTGGTTTGGTGCATTCATTG	59.964	CCCAAAACTCATCAACAGGA	58.541
TRINITY_DN25713_c1_g1_i5_gene=TRINITY_DN25713_c1_g1_len=1846	(AG)10	GGTGGATGATGAAGCATTGTT	59.811	TCATCATCGTCACGTCGTTT	60.12
TRINITY_DN25713_c1_g1_i5_gene=TRINITY_DN25713_c1_g1_len=1846	(AGA)5	TCCATCTCGAACTCACCACA	60.246	TGTGGATGGTTGGTTACAATG	59.159
TRINITY_DN25714_c4_g1_i1_gene=TRINITY_DN25714_c4_g1_len=1145	(A)10	AATTGGCGTAAACCCATCTG	59.823	TCTGATTTATTCTTGCCACGG	60.081
TRINITY_DN25717_c2_g3_i2_gene=TRINITY_DN25717_c2_g3_len=2002	(TGT)15	ACAACAGTTCCCCAAACGAG	60.005	TCACAACCCAACCACAAAGA	59.976
TRINITY_DN25717_c3_g1_i1_gene=TRINITY_DN25717_c3_g1_len=3068	(T)11	CATGATGGTATCCACCCTCC	60.011	CAATGGGGTATGGGAATGAG	60.006
TRINITY_DN25722_c0_g1_i14_gene=TRINITY_DN25722_c0_g1_len=2526	(GT)7	CGTTATATTTCGTGCGTTGC	59.24	GGGGAGCATTGGTCACTAAA	59.933
TRINITY_DN25723_c0_g2_i6_gene=TRINITY_DN25723_c0_g2_len=2571	(TTG)5	GGTTGGGAAGGAGAAAAAGG	59.912	CCGATGGATCGGACTATTTT	58.857
TRINITY_DN25727_c0_g1_i10_gene=TRINITY_DN25727_c0_g1_len=1804	(TTC)5	CCAGCCATGACAAACATGAG	60.112	AAAAGAACGGTGAAGTTGGAAA	60.015
TRINITY_DN25727_c1_g1_i1_gene=TRINITY_DN25727_c1_g1_len=1869	(A)12	GGAATTGGAGGGGGAACTTA	60.124	TGAGGATGACGACAATGAGC	59.794
TRINITY_DN25729_c0_g2_i8_gene=TRINITY_DN25729_c0_g2_len=1349	(A)24	ATAGTGCTGGTTCACGGGTC	59.997	ATGTCTGTGGCTCTTGGTCC	60.12
TRINITY_DN25732_c1_g1_i1_gene=TRINITY_DN25732_c1_g1_len=1011	(GAT)5	TAGCAGGCTTTCCTTCCTCA	60.088	TCGCTGTCTCTTCTCAACCA	59.701
TRINITY_DN25737_c0_g1_i4_gene=TRINITY_DN25737_c0_g1_len=2583	(T)10	TCAATGCTTCCTCCAACTCC	60.195	ACCAGACCTTTAGCTGGCAA	59.875
TRINITY_DN25738_c1_g2_i4_gene=TRINITY_DN25738_c1_g2_len=1784	(GAA)7	TGATCGGAACCAGGAAAATC	59.871	AGACAGAGGTGTACTCGCCG	60.466
TRINITY_DN25738_c1_g3_i6_gene=TRINITY_DN25738_c1_g3_len=2117	(TAA)5	TGAATCTGTTCTTCTATGAGGCA	58.986	AGTCCCAAGGCTGGGATAAT	59.789
TRINITY_DN25738_c1_g3_i6_gene=TRINITY_DN25738_c1_g3_len=2117	(T)11	TGGACATGAAAAGGAGTTGAGA	59.711	CCAAACCAAACCGAGTCAAT	59.83
TRINITY_DN25740_c2_g3_i1_gene=TRINITY_DN25740_c2_g3_len=252	(T)15	GGTTGTGGTGTTGTTGTTGC	59.905	CCACTGAAATTTGAAAGCCAA	60.096
TRINITY_DN25742_c0_g1_i1_gene=TRINITY_DN25742_c0_g1_len=2582	(A)14	CCTTGCAGACGCTCTTAGGT	59.639	TCGCTTTCTCTCTCGTCGAT	60.24
TRINITY_DN25742_c0_g2_i6_gene=TRINITY_DN25742_c0_g2_len=1563	(T)14	GTGCCACGTACAAGCCTACA	59.788	GAAGAGCTGCTTAAGGAGGGA	60.103
TRINITY_DN25743_c1_g1_i2_gene=TRINITY_DN25743_c1_g1_len=251	(TCT)5	GAAAACATGCATTCATCCCC	60.141	TCAGGAAGAAAGAAAAAGAGGAAA	59.882
TRINITY_DN25747_c0_g1_i1_gene=TRINITY_DN25747_c0_g1_len=2590	(A)11	CCGTCCAGTTTCTGTCCTGT	60.151	TGAGTTCCATTTTGAATCTCTCA	58.823
TRINITY_DN25762_c0_g2_i5_gene=TRINITY_DN25762_c0_g2_len=1019	(A)10	CTTGCGTGCACGAGAAAATA	60.014	CATCTTCCACCTCTTTGGGA	60.042
TRINITY_DN25765_c0_g2_i5_gene=TRINITY_DN25765_c0_g2_len=1081	(T)10	GAACCACGGCGAGGTAATAA	59.96	ACCCCTACCCATTCTGTTCC	60.052
TRINITY_DN25769_c3_g3_i5_gene=TRINITY_DN25769_c3_g3_len=928	(AT)11	AATCTGCCCATTTCAGCAAG	60.214	TGAAAAGATTTGCGGACACA	60.234
TRINITY_DN25769_c3_g3_i5_gene=TRINITY_DN25769_c3_g3_len=928	(A)10	TGGACTTAGAGAGAGTCATATGCAA	59.467	TTGTCTTCACACCAACCAAAA	59.058
TRINITY_DN25772_c0_g2_i1_gene=TRINITY_DN25772_c0_g2_len=426	(TTC)7	AGCCACTTTCCGAGATGTTC	59.288	AGCAAACCCGGAAGAAAAAT	59.945
TRINITY_DN25772_c2_g7_i2_gene=TRINITY_DN25772_c2_g7_len=617	(TTC)7	TGCCTTGATCCTTTCCGTTA	60.576	CGGACAAGTCCGAGAAAAAG	59.846
TRINITY_DN25773_c3_g1_i1_gene=TRINITY_DN25773_c3_g1_len=1409	(GA)7	ATTCCGGTCATGTCTGTTCC	59.786	TGAAATTTTTAAGCGTGCCC	60.075
TRINITY_DN25777_c1_g1_i3_gene=TRINITY_DN25777_c1_g1_len=2139	(ACA)5	CAAAAGACTGAAAGGGCTGC	59.993	CGAATTCCATTCCAAGCCTA	60.031
TRINITY_DN25784_c0_g1_i6_gene=TRINITY_DN25784_c0_g1_len=2141	(T)13	CACTGCGTGTTGTGTGAGAA	59.48	ACGCAAAAAGCTTCACGACT	60.059
TRINITY_DN25784_c0_g1_i6_gene=TRINITY_DN25784_c0_g1_len=2141	(T)10	TCCCGATTAACTCTCGCTCT	59.031	TAAAATGCGAATATGCGACG	59.699
TRINITY_DN25788_c1_g2_i1_gene=TRINITY_DN25788_c1_g2_len=1924	(CAT)7	AACAACACCAAAACCAAGCC	59.875	ATGGCAGCCACAGAAATTGT	60.526
TRINITY_DN25788_c1_g2_i1_gene=TRINITY_DN25788_c1_g2_len=1924	(ATG)5	TCCACCTATTCTTGTTCCGC	60.074	TCAAATCTCAGCTTCACACACA	59.49
TRINITY_DN25793_c0_g1_i13_gene=TRINITY_DN25793_c0_g1_len=2627	(GTT)6	GTCGACGATTCAGCTTGTGA	59.992	TGAGTTTTCAGCAATGGCAA	60.379
TRINITY_DN25794_c0_g1_i2_gene=TRINITY_DN25794_c0_g1_len=739	(TGT)5	GTCTGCTTCAGCTTCGTCCT	59.751	AATGCAACAACATGCAGCAC	60.741
TRINITY_DN25795_c1_g2_i8_gene=TRINITY_DN25795_c1_g2_len=1255	(CAT)5	CATCTTCATCACTGGCCCTT	60.073	GAAAACCAGAGGGGAGGTTC	59.912
TRINITY_DN25796_c1_g4_i1_gene=TRINITY_DN25796_c1_g4_len=597	(AG)6	GCAAATCCGCCAATACACAT	60.731	GATGGATTGAAATGTGTTGCAT	59.696
TRINITY_DN25804_c0_g3_i1_gene=TRINITY_DN25804_c0_g3_len=2227	(A)11	ACCTTGTTCGGCACAAAAAC	60.015	TAAGTGGAATGGAAAAGGCG	60.067
TRINITY_DN25804_c0_g3_i1_gene=TRINITY_DN25804_c0_g3_len=2227	(AGA)5	TCAATGTTACTTGCAGGCTCA	59.478	TAATGGTGTTCGTGGTGACG	60.427
TRINITY_DN25806_c0_g1_i6_gene=TRINITY_DN25806_c0_g1_len=2939	(A)10	AATAATGGGCAGTGACTCGG	59.955	CTTTTCTCTCTTGTTGGCGG	59.986
TRINITY_DN25809_c0_g1_i1_gene=TRINITY_DN25809_c0_g1_len=243	(AG)8	TGGAAACAAGGTTTTGCAGAG	60.269	TGTTTCCATTCTCATTTATCGG	58.943
TRINITY_DN25815_c0_g2_i2_gene=TRINITY_DN25815_c0_g2_len=1172	(TTC)6	CAACCCCAATTTCGTGATTC	60.17	GCAAGACAAACACACACGCT	59.953
TRINITY_DN25816_c0_g1_i4_gene=TRINITY_DN25816_c0_g1_len=1692	(A)10	CTGGCCAAAACTCCATTTGT	59.971	CTTTTGTGATTTCGGTCGGT	59.971
TRINITY_DN25817_c0_g1_i5_gene=TRINITY_DN25817_c0_g1_len=1851	(A)12	CTCCTTCCTCTTTCCCTTGG	60.175	GCAACAGACTTGATGTCGGA	59.837
TRINITY_DN25817_c0_g4_i5_gene=TRINITY_DN25817_c0_g4_len=1258	(A)11	ATCTTGCACCAAATGAAGGG	59.933	AAAGCAAGAACCTGACGGAG	59.473
TRINITY_DN25819_c0_g3_i1_gene=TRINITY_DN25819_c0_g3_len=355	(ATG)5	GTTGTAAGGTCAGGGGCTCA	60.111	AAGGTTTTTGCAACACTTCCA	59.64
TRINITY_DN25819_c1_g2_i7_gene=TRINITY_DN25819_c1_g2_len=4220	(CAT)5	AGCCAACTGATTCGCATTCT	59.843	TTCCGGATCCTGATTTTCAC	59.871
TRINITY_DN25819_c2_g1_i3_gene=TRINITY_DN25819_c2_g1_len=1223	(A)10	AATGTACGAGTCCGATTGCG	61.052	GGGAAGGGAACCAAACAAAA	61.05
TRINITY_DN25823_c0_g2_i2_gene=TRINITY_DN25823_c0_g2_len=1575	(AC)6	CCACTCCACACCCAATTTTT	59.688	ATTCTGAAGACCGGAGACGA	59.803
TRINITY_DN25830_c0_g2_i1_gene=TRINITY_DN25830_c0_g2_len=843	(CT)10	GAGGTTCAGAGATTGCAGCC	59.957	GGTGATGAAGGATCTGAGGAA	59.079
TRINITY_DN25832_c0_g1_i3_gene=TRINITY_DN25832_c0_g1_len=2246	(GCG)6	GTCAGTGGAGGAAGAGGCTG	59.986	CTCTCTCTCCACCAACTCCG	59.978
TRINITY_DN25834_c0_g2_i5_gene=TRINITY_DN25834_c0_g2_len=1955	(ACA)6	TGAGACGGGGTAGAACGAGT	59.721	TCATTCTCGACCTCACAACG	59.831
TRINITY_DN25839_c0_g1_i1_gene=TRINITY_DN25839_c0_g1_len=908	(T)11	TCACGTATCCGGAGGGTATC	59.773	CTCCGATACGGCATCCATAC	60.318
TRINITY_DN25845_c2_g1_i1_gene=TRINITY_DN25845_c2_g1_len=1210	(T)11	AACTATTCCCTCCGTTCCCA	60.683	TGAGATTTTTATATACTCCCTCTGTCC	59.405
TRINITY_DN25845_c2_g1_i1_gene=TRINITY_DN25845_c2_g1_len=1210	(A)10	GGACAGAGGGAGTATATAAAAATCTCA	59.405	AATGAGAGACTCTGGGCGG	60.356
TRINITY_DN25845_c2_g2_i4_gene=TRINITY_DN25845_c2_g2_len=1946	(GA)8	TGATTCGACGAAGTGAGGTG	59.831	GCTGGAGACAGAAAACACCC	59.703
TRINITY_DN25845_c2_g6_i2_gene=TRINITY_DN25845_c2_g6_len=953	(GA)7	CATCCTCGTTCTTCCTCTGC	59.95	ACACAATATAAAACTCAAAATTTCACA	57.461
TRINITY_DN25855_c5_g4_i9_gene=TRINITY_DN25855_c5_g4_len=1513	(TGT)5	TCTTCCCGCTTTTTCTCAAA	59.931	ACATAAACCGCACACTTCCC	59.859
TRINITY_DN25857_c0_g3_i4_gene=TRINITY_DN25857_c0_g3_len=1616	(A)10	GGCAACGTACAGCACTGAAA	59.911	ATTTTTCCGATTTGCCTGTG	59.938
TRINITY_DN25857_c0_g5_i2_gene=TRINITY_DN25857_c0_g5_len=872	(A)10	GGCAACGTACAGCACTGAAA	59.911	TTCTTTAATCTGAGGCTTCTTCAA	58.757
TRINITY_DN25859_c2_g1_i3_gene=TRINITY_DN25859_c2_g1_len=1567	(T)11	CACCCACCAACTAATGTCCC	60.088	CAAGAAATGGAGGGAACGAA	60.044
TRINITY_DN25862_c2_g1_i3_gene=TRINITY_DN25862_c2_g1_len=3835	(CA)6	TCAAAAATCAATGGGAAGCA	59.087	AATGACTAGCGGGTGTGTGA	59.165
TRINITY_DN25863_c0_g2_i1_gene=TRINITY_DN25863_c0_g2_len=750	(A)10	AACCGGACTTTTGGGTTTTC	60.2	TTTTCCTTTCTCATTTCTTCTGC	59.048
TRINITY_DN25863_c1_g1_i3_gene=TRINITY_DN25863_c1_g1_len=1185	(A)12	TATCTGAGAAGTGGGGTGCC	60.073	CTGCAGGGTATGTCACATGG	59.984
TRINITY_DN25867_c2_g2_i2_gene=TRINITY_DN25867_c2_g2_len=1328	(TC)8	TCAAATCCTCACCCTCCATC	59.862	TATGCTTCAGCTTGGCATTG	59.976
TRINITY_DN25874_c2_g1_i1_gene=TRINITY_DN25874_c2_g1_len=260	(A)10	GTTGTTATGAGAAACGAGAAAACA	57.572	TTAATGCATTGGGTTGGGTT	60.053
TRINITY_DN25876_c0_g2_i6_gene=TRINITY_DN25876_c0_g2_len=921	(T)10	TACCATCCCACCTTCGTTTC	59.79	ATACGAGGGGCATCACATTC	59.78
TRINITY_DN25877_c1_g1_i4_gene=TRINITY_DN25877_c1_g1_len=2683	(GA)20	TGGAGAATGATGTGAGCGAC	59.794	AAACAACCGCTATTAGCTTTGAA	59.384
TRINITY_DN25877_c1_g2_i1_gene=TRINITY_DN25877_c1_g2_len=1706	(CT)12	CATGGAAGTCACACCACCTG	59.997	TTCAGAGAAGAAAAAGTGACACAGA	59.611
TRINITY_DN25884_c0_g2_i1_gene=TRINITY_DN25884_c0_g2_len=992	(A)13	TGAGAAACAACCTGCTGTGG	59.873	TTCAACACTTGCGTCACCAT	60.16
TRINITY_DN25885_c1_g2_i1_gene=TRINITY_DN25885_c1_g2_len=943	(T)10	CGATTAACGCGTCTGGATTT	60.096	GCCATTCGATCCCTGTTCTA	60.036
TRINITY_DN25890_c0_g2_i3_gene=TRINITY_DN25890_c0_g2_len=1109	(GA)6	GGAGGAAGTGAGGTCGATCA	60.199	TCTTCTCCCTGCTTTTTCCA	59.926
TRINITY_DN25895_c0_g1_i2_gene=TRINITY_DN25895_c0_g1_len=357	(TC)9	TCAAATTCACTTCCACCCAA	58.947	CTCTGCTAGAAATCCACCGC	59.978
TRINITY_DN25895_c1_g1_i1_gene=TRINITY_DN25895_c1_g1_len=422	(AG)7	CTCTGCTAGAAATCCACCGC	59.978	TCAAATTCACTTCCACCCAA	58.947
TRINITY_DN25900_c1_g2_i3_gene=TRINITY_DN25900_c1_g2_len=2549	(ATC)6	CCCTTTGTTAGAGGCTCCCT	59.707	TGCTAAACGTGTTCCTGCTG	60.05
TRINITY_DN25902_c0_g1_i1_gene=TRINITY_DN25902_c0_g1_len=1701	(AG)6	GCTGGTGGACATGTTGATTG	59.967	AACCCTTCTTTTTCTCTGTCCC	59.982
TRINITY_DN25912_c0_g2_i3_gene=TRINITY_DN25912_c0_g2_len=1306	(A)12	TGAGACCAGAGAATACATCCAAGA	60.13	GATGAAGGAAGTGGCGGTAA	60.074
TRINITY_DN25912_c0_g4_i1_gene=TRINITY_DN25912_c0_g4_len=218	(A)12	TCCGAGATATGATAAATAAAAAGATTC	57.565	AAAGCACAGTAACTTCTCACTAGTTTT	57.678
TRINITY_DN25914_c0_g1_i1_gene=TRINITY_DN25914_c0_g1_len=260	(AAC)7	CGCAGAAGAGTCATAGTTGCC	60.03	TCATCATGCTCCCCTTTTTC	60.014
TRINITY_DN25914_c2_g1_i1_gene=TRINITY_DN25914_c2_g1_len=744	(AAC)6	TCAAACTACCGGAATCGGTC	59.933	ATATTCCGCACTCCGATTGA	60.435
TRINITY_DN25914_c3_g2_i1_gene=TRINITY_DN25914_c3_g2_len=1534	(TGT)7	TCAATTGAACCAACCTGAATTG	59.839	TGGATAAGCTTTGGTTTCACC	59.077
TRINITY_DN25915_c1_g1_i3_gene=TRINITY_DN25915_c1_g1_len=3945	(T)10	CCTCCGACACCCTCACTAAA	60.103	AAGCCTCTCCTTTCCCATTC	59.651
TRINITY_DN25915_c1_g1_i3_gene=TRINITY_DN25915_c1_g1_len=3945	(T)10	CGAAGAAGATGAAGCGGAAG	60.088	AGTCGTTGCAATGGAAAACC	59.978
TRINITY_DN25920_c0_g1_i8_gene=TRINITY_DN25920_c0_g1_len=3922	(A)11	GCCTACTTCTGAAGGCATGG	59.836	GGGCTTCCTCCTCAGTTTTC	60.19
TRINITY_DN25921_c2_g1_i4_gene=TRINITY_DN25921_c2_g1_len=640	(A)10	CAAAAAGAAAGAAGAGGGCAAA	59.873	TGTGTTTGTTCGTTGCGTTT	60.195
TRINITY_DN25921_c3_g2_i6_gene=TRINITY_DN25921_c3_g2_len=2383	(T)10	GCGATTCCGTTGTACTGGTT	60	GATGGATGTGGTGTACCATACG	60
TRINITY_DN25922_c5_g2_i1_gene=TRINITY_DN25922_c5_g2_len=1906	(A)14	CGTTGGGATGGTGAATAATG	58.695	GTGTCTTGGTGGTTGCATTG	60.008
TRINITY_DN25924_c1_g1_i1_gene=TRINITY_DN25924_c1_g1_len=464	(A)13	TCCTTCATAACTCACAAGTGCAA	59.799	AAGAGGGGCCAAGTGAAAAT	59.94
TRINITY_DN25924_c1_g4_i1_gene=TRINITY_DN25924_c1_g4_len=258	(TTG)6	CCAAGTGAAAATGGGGATTG	60.162	CAACATGCTTGCTAACAAGTAACA	59.42
TRINITY_DN25931_c0_g1_i2_gene=TRINITY_DN25931_c0_g1_len=1963	(A)15	ATTTCTGTTTCCGTGCCAAG	60.11	TCTGAAACAAAACGTAACCGA	58.332
TRINITY_DN25937_c0_g2_i1_gene=TRINITY_DN25937_c0_g2_len=239	(GA)	GAAAGACAAGAAGGAAGAGAGGAA	59.546	TCTCTTTTGTCGTCCTTTCTCA	59.097
TRINITY_DN25939_c0_g1_i1_gene=TRINITY_DN25939_c0_g1_len=1688	(GA)6	GGAGCAGGCAAGAAATTGAG	59.955	ACTCACCCTTTCCCTTCGTT	59.972
TRINITY_DN25942_c2_g1_i2_gene=TRINITY_DN25942_c2_g1_len=7438	(T)10	AGCCCACACCTGAAAAACAT	59.454	ATCTTCAATTGGACCCCCTC	60.133
TRINITY_DN25945_c0_g1_i1_gene=TRINITY_DN25945_c0_g1_len=3592	(A)10	ATTTAGCCGCCTCAGACTCA	59.978	GTTGGTTGCAGCCGTTTATT	60.003
TRINITY_DN25952_c0_g2_i7_gene=TRINITY_DN25952_c0_g2_len=3743	(T)10	AACGTAATGTGCCAATGCAA	59.999	ATTGAGTTGTCGGGTGGAAG	59.966
TRINITY_DN25954_c4_g2_i1_gene=TRINITY_DN25954_c4_g2_len=1796	(CAC)8	GTTGCAATGCACGAACAACT	59.77	TCATTTGTCAAGGAGTGTGGA	59.124
TRINITY_DN25954_c4_g2_i1_gene=TRINITY_DN25954_c4_g2_len=1796	(AG)8	TCTAAGCCACAAAAACTAACACC	57.586	GAAACCTGTTGTGGTCGTGA	59.571
TRINITY_DN25954_c5_g2_i3_gene=TRINITY_DN25954_c5_g2_len=867	(GTG)7	AGGGTGAGTTGGAACGACAG	60.151	CCCAACTAAATCACCAGCTCA	60.118
TRINITY_DN25956_c1_g1_i4_gene=TRINITY_DN25956_c1_g1_len=2222	(A)13	CCTGTCAAATATGTCGGCAA	59.542	TTTTCTGTTTCCAGGGTTTG	57.702
TRINITY_DN25962_c1_g1_i1_gene=TRINITY_DN25962_c1_g1_len=382	(ACA)5	AGCATCCGTGAAAACCACTC	60.119	TAGCCGACCCCATTTACTGA	60.46
TRINITY_DN25965_c2_g1_i1_gene=TRINITY_DN25965_c2_g1_len=1403	(TTG)7	GGAAAAGCAGAAACACCGAC	59.717	CGGCGGTCAAATGTATTCTT	59.96
TRINITY_DN25965_c2_g2_i3_gene=TRINITY_DN25965_c2_g2_len=2245	(AG)8	ACAACGGTTTGTGTGGCATA	59.888	AGCGAGAGATTGAGGGAACA	59.95
TRINITY_DN25965_c2_g2_i3_gene=TRINITY_DN25965_c2_g2_len=2245	(CT)7	ACAACGGTTTGTGTGGCATA	59.888	TTCATTTCATCCATCCCTCC	59.685
TRINITY_DN25965_c2_g2_i3_gene=TRINITY_DN25965_c2_g2_len=2245	(T)13	ATGGAACGGAATGCATCCTA	60.296	CACCGATTTGAATTGCATGA	60.466
TRINITY_DN25965_c2_g2_i3_gene=TRINITY_DN25965_c2_g2_len=2245	(A)10	GAAGAAAATCCACTGCCTGC	59.82	CAATTATGCCACACAAACCG	59.849
TRINITY_DN25970_c1_g5_i1_gene=TRINITY_DN25970_c1_g5_len=1984	(GTT)5	GGAGAAGGTGGTGTCATTGG	60.363	GATGGCAACCAGAAGAGGAA	60.195
TRINITY_DN25970_c1_g6_i1_gene=TRINITY_DN25970_c1_g6_len=260	(AAC)5	GCCACTCTCAAGGTTTCTCC	58.868	GGGCCCATTAGTGTATGTGG	60.074
TRINITY_DN25973_c0_g2_i1_gene=TRINITY_DN25973_c0_g2_len=3150	(TTC)5	CTCAATTGGTTCCATTCCCA	60.692	CCAAGACAACACTGCACTCG	60.5
TRINITY_DN25975_c0_g2_i1_gene=TRINITY_DN25975_c0_g2_len=1591	(GA)6	TAGCACGGTTATCACCCCAT	60.214	TCATGAATTGGTTTCCTTCCTC	60.299
[truncated: 3,221 more rows]
